# Supplementary material for: The palladium(ii)-catalyzed regioselectiveortho-C–H bromination/iodination of arylacetamides within situgenerated imidic acid as the directing group: mechanistic exploration
Source: Royal Society of Chemistry journal article supplement (doi:10.1039/c9ob01082c), 2019-01-01

## Supporting Information

### Palladium(II)-Catalyzed Regioselective *Ortho*-C-H Bromination/Iodination of Arylacetamides *via* in situ Generated Imidic Acid as Directing group: Mechanistic Exploration

Yogesh Jaiswal, Yogesh Kumar and Amit Kumar\*

Department of Chemistry, Indian Institute of Technology Patna, Bihta 801106, Bihar, India

\*E-mail: [amitkt@iitp.ac.in](mailto:amitkt@iitp.ac.in) or [amitktiitk@gmail.com](mailto:amitktiitk@gmail.com)

#### Contents

|                                                                                               |         |
|-----------------------------------------------------------------------------------------------|---------|
| 1. Procedure for intermolecular competition experiment between 1b and 1j.....                 | S2      |
| 2. Procedure for intermolecular competition experiment between 1a and 5.....                  | S2      |
| 3. Procedure for Intermolecular competition experiment between 1a and 1a-d <sub>5</sub> ..... | S2-S3   |
| 4. Procedure for parallel experiment between 1a and 1a-d <sub>5</sub> .....                   | S3..S4  |
| 5. Procedure for intermolecular deuterium exchange without NBS in D <sub>2</sub> O.....       | S4      |
| 6. Procedure for intermolecular deuterium exchange with NBS in D <sub>2</sub> O.....          | S4-S5   |
| 7. Procedure for intermolecular deuterium exchange without NBS in CF <sub>3</sub> COOD.....   | S5-S6   |
| 8. Procedure for intermolecular deuterium exchange with NBS in CF <sub>3</sub> COOD.....      | S6      |
| 9. XRD data.....                                                                              | S7-S7   |
| 10. Reaction monitoring by <sup>1</sup> H NMR experiment.....                                 | S9-S10  |
| 11. DFT details.....                                                                          | S11-S16 |
| 12. References.....                                                                           | S17-S18 |
| 13. NMR data.....                                                                             | S19-S54 |

**1. Procedure for intermolecular competition experiment between 1b and 1j.** A suspension of Pd(OAc)<sub>2</sub> (5.0 mol %, 2.4 mg), NBS (1.2 equiv, 43 mg), TFA (10.0 equiv, 150.0 μL), **1b** (0.2 mmol, 29.8 mg, 1.0 equiv), and **1j** (0.2 mmol, 36 mg, 1.0 equiv) was stirred in DCE (2.0 mL) for 24 h at 50 °C. After cooling to room temperature, the solvent was evaporated in vacuum. The reaction mixture was diluted with ethyl acetate, followed by neutralization with an aqueous solution of sodium bicarbonate. After extraction with ethyl acetate, the organic layer was washed with brine solution and dried over sodium sulfate. The combined organic layer was concentrated under vacuum. The crude mixture was purified by column chromatography using ethyl acetate/hexanes as eluent. Compound **2b** was isolated in 57% yield and **2j** was formed in trace amount.

**2. Procedure for intermolecular competition experiment between 1a and 5:** To a oven dried sealed tube, phenylacetamide (**1a**) (30 mg, 0.20 mmol), N-benzyl phenylacetamide (**5**) (45 mg, 0.20 mmol), Pd(OAc)<sub>2</sub> (2.4 mg, 0.05 mmol), NBS (43 mg, 0.24 mmol), TFA (10 equiv, 150 μL) and DCE (2.0 mL) was added. The mixture was stirred at 50 °C for 24 h. After cooling to room temperature, the solvent was evaporated in vacuum. The reaction mixture was diluted with ethyl acetate, followed by neutralization with an aqueous solution of sodium bicarbonate. After extraction with ethyl acetate, the organic layer was washed with brine solution and dried over sodium sulfate. The combined organic layer was concentrated under vacuum. The crude mixture was purified by column chromatography using ethyl acetate/hexanes as eluent. Compound **2a** was isolated in 38% yield and **4a** was formed in 28% amount.

**3. Procedure for intermolecular competition experiment between 1a and 1a-D<sub>5</sub>:** To a oven dried sealed tube, following the general procedure, phenylacetamide (**1a**) (27 mg, 0.20 mmol), deuterated phenylacetamide (**1a-D<sub>5</sub>**) (28 mg, 0.20 mmol), Pd(OAc)<sub>2</sub> (2.4 mg, 0.05 mmol),

NBS (43 mg, 0.24 mmol), TFA (10 equiv, 150  $\mu$ L) and DCE (2.0 mL) was added. The mixture was stirred at 50  $^{\circ}$ C for 2 h. After cooling to room temperature, the solvent was evaporated in vacuum. The reaction mixture was diluted with ethyl acetate, followed by neutralization with an aqueous solution of sodium bicarbonate. After extraction with ethyl acetate, the organic layer was washed with brine solution and dried over sodium sulfate. The combined organic layer was concentrated under vacuum. The crude mixture was purified by column chromatography using ethyl acetate/hexanes as eluent. The ratio of **1a** and **1a-D<sub>5</sub>** was determined by  $^1$ H NMR analysis, found to be  $k_H/k_D \approx 1.0$ .

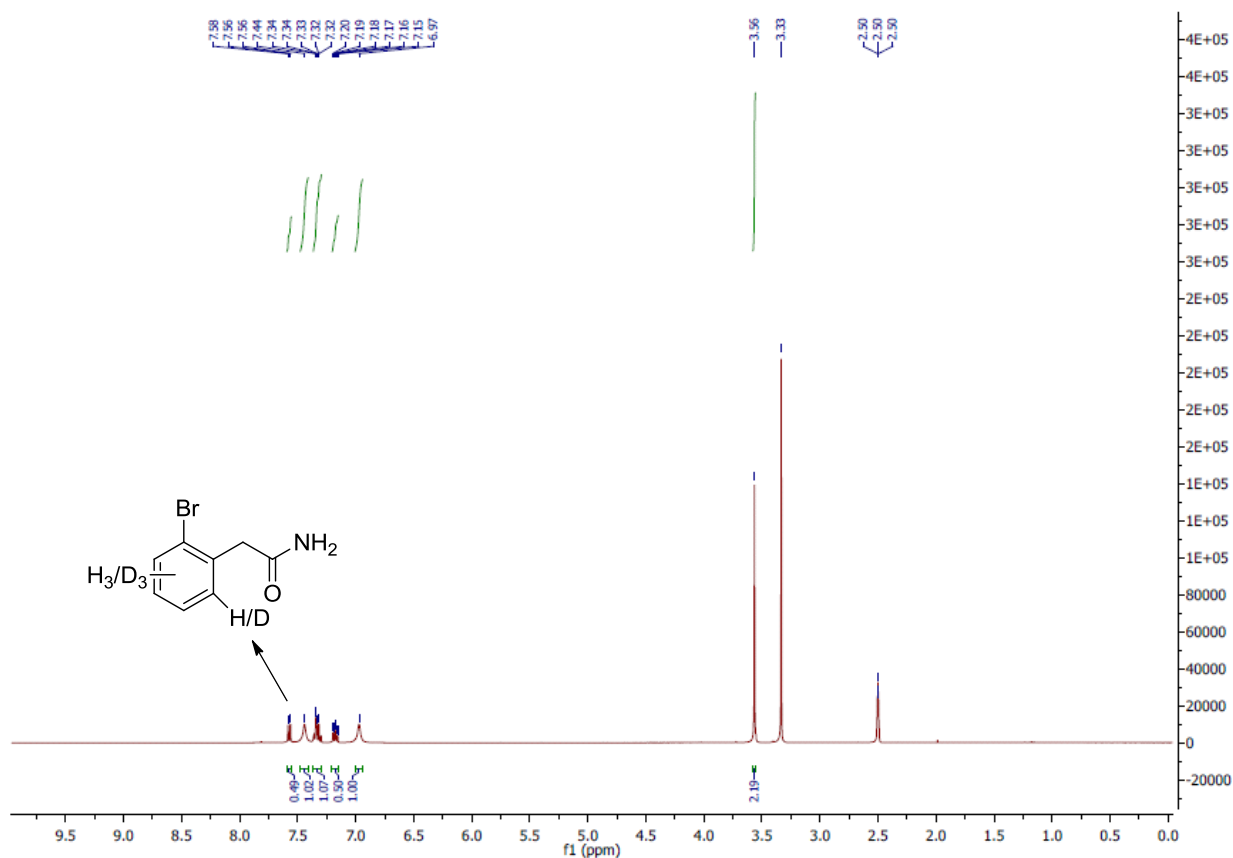

**4. Procedure for parallel experiment between **1a** and **1a-D<sub>5</sub>**:** Following the general procedure, two parallel reaction for phenylacetamide (**1a**) (27 mg, 0.25 mmol) and deuterated phenylacetamide (**1a-D<sub>5</sub>**) (28 mg, 0.25 mmol), were performed. The mixture was stirred at 50

°C for 2 h. After cooling to room temperature, the solvent was evaporated in vacuum. The reaction mixture was diluted with ethyl acetate, followed by neutralization with an aqueous solution of sodium bicarbonate. After extraction with ethyl acetate, the organic layer was washed with brine solution and dried over sodium sulfate. The combined organic layer was concentrated under vacuum. The crude mixture was purified by column chromatography using ethyl acetate/hexanes as eluent. Product **2a** was isolated in 18% yield and **2a-d<sub>4</sub>** was isolated in 14% yield.

**5. Procedure for H/D exchange experiment without NBS in D<sub>2</sub>O:** In a oven dried sealed tube equipped with stirrer bar, was sequentially added phenylacetamide (**1a**) (0.25 mmol, 34.0 mg), Pd(OAc)<sub>2</sub> (5.0 mol%, 2.8 mg), D<sub>2</sub>O (10.0 equiv, 50.0 μL) and TFA (10.0 equiv, 190.0 μL). Then 2.0 mL of DCE was added in the reaction mixture. The reaction was stirred at 50 °C for 24 h and the solvent was evaporated in vacuum. The reaction mixture was diluted with ethyl acetate, followed by neutralization with an aqueous solution of sodium bicarbonate. After extraction with ethyl acetate, the organic layer was washed with brine solution and dried over sodium sulfate. The combined organic layer was concentrated under vacuum. The crude mixture was purified by column chromatography using ethyl acetate/hexanes as eluent to give starting material in 90% yield without any deuterium exchange.

**6. Procedure for H/D exchange experiment with NBS in D<sub>2</sub>O:** In a oven dried sealed tube equipped with stirrer bar, was sequentially added phenylacetamide (**1a**) (0.25 mmol, 34 mg), Pd(OAc)<sub>2</sub> (5.0 mol%, 2.8 mg), NBS (0.3 mmol, 53.4 mg), D<sub>2</sub>O (10.0 equiv, 50.0 μL) and TFA (10.0 equiv, 190 μL). Then 2.0 mL of DCE was added in the reaction mixture. The reaction was stirred at 50 °C for 24 h and the solvent was evaporated in vacuum. The reaction mixture was diluted with ethyl acetate, followed by neutralization with an aqueous solution of sodium

bicarbonate. After extraction with ethyl acetate, the organic layer was washed with brine solution and dried over sodium sulfate. The combined organic layer was concentrated under vacuum. The crude mixture was purified by column chromatography using ethyl acetate/hexanes as eluent to give product **2a** in 30% yield without any deuterium exchange along with 55% of starting material **1a**.

**7. Procedure for H/D exchange experiment without NBS in CF<sub>3</sub>COOD:** In a oven dried sealed tube equipped with stirrer bar, was sequentially added phenylacetamide (**1a**) (0.25 mmol, 34 mg), Pd(OAc)<sub>2</sub> (5.0 mol%, 2.8 mg), D<sub>2</sub>O (10.0 equiv, 50.0 μL) and CF<sub>3</sub>COOD (10.0 equiv, 190.0 μL). Then 2.0 mL of DCE was added in the reaction mixture. The reaction was stirred at 50 °C for 24 h and the solvent was evaporated in vacuum. The reaction mixture was diluted with ethyl acetate, followed by neutralization with an aqueous solution of sodium bicarbonate. After extraction with ethyl acetate, the organic layer was washed with brine solution and dried over sodium sulfate. The combined organic layer was concentrated under vacuum. The crude mixture was purified by column chromatography using ethyl acetate/hexanes as eluent to give starting material in 90% yield. Deuterium incorporation was determined by <sup>1</sup>H NMR.

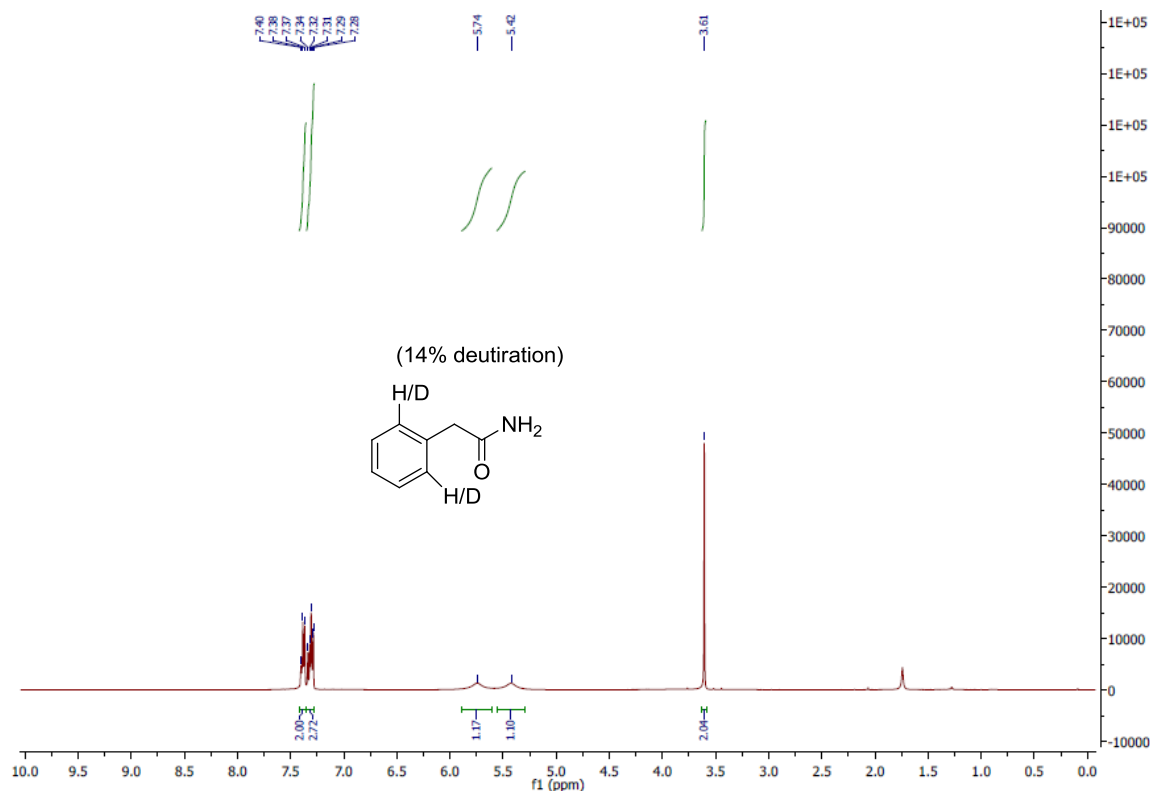

**8. Procedure for H/D exchange experiment with NBS in CF<sub>3</sub>COOD:** In a oven dried sealed tube equipped with stirrer bar, was sequentially added phenylacetamide (**1a**) (0.25 mmol, 34 mg), Pd(OAc)<sub>2</sub> (5.0 mol%, 2.8 mg), NBS (0.3 mmol, 53.4 mg) and DCE (2.0 mL). Then CF<sub>3</sub>COOD (10.0 equiv, 190.0 μL) was added in the reaction mixture. The reaction was stirred at 50 °C for 24 h and the solvent was evaporated in vacuum. The reaction mixture was diluted with ethyl acetate, followed by neutralization with an aqueous solution of sodium bicarbonate. After extraction with ethyl acetate, the organic layer was washed with brine solution and dried over sodium sulfate. The combined organic layer was concentrated under vacuum. The crude mixture was purified by column chromatography using ethyl acetate/hexanes as eluent to give product **2a** in 55% yield without any deuterium exchange.

## 9. XRD data

### (a) XRD data of 2e (CCDC No. 1909226)

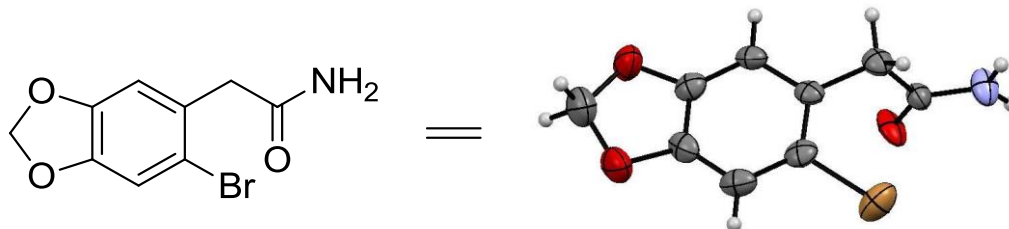

|                                 |                                                            |                            |
|---------------------------------|------------------------------------------------------------|----------------------------|
| Chemical formula                | $C_{88}BrNO_2$                                             |                            |
| Formula weight                  | 258.07 g/mol                                               |                            |
| Temperature                     | 298(2) K                                                   |                            |
| Wavelength                      | 0.71073 Å                                                  |                            |
| Crystal size                    | 0.300 x 0.300 x 0.300 mm                                   |                            |
| Crystal system                  | Monoclinic                                                 |                            |
| Space group                     | $P1\ 21/c$                                                 |                            |
| Unit cell dimensions            | $a = 11.507(4)$ Å                                          | $\alpha = 90^\circ$        |
|                                 | $b = 4.8430(18)$ Å                                         | $\beta = 100.591(9)^\circ$ |
|                                 | $c = 17.180(6)$ Å                                          | $\gamma = 90^\circ$        |
| Volume                          | $941.1(6)$ Å <sup>3</sup>                                  |                            |
| Z                               | 4                                                          |                            |
| Density (calculated)            | 1.821 g/cm <sup>3</sup>                                    |                            |
| Absorption coefficient          | 4.346 mm <sup>-1</sup>                                     |                            |
| F(000)                          | 512                                                        |                            |
| Theta range for data collection | 2.73 to 24.84°                                             |                            |
| Index ranges                    | $-13 \leq h \leq 13, -5 \leq k \leq 5, -20 \leq l \leq 20$ |                            |
| Reflections collected           | 9914                                                       |                            |
| Independent reflections         | 1617 [R(int) = 0.0923]                                     |                            |
| Refinement method               | Full-matrix least-squares on $F^2$                         |                            |
| Refinement program              | SHELXL-2014/ (Sheldrick, 2014)                             |                            |
| Function minimized              | $\Sigma w(F_o^2 - F_c^2)^2$                                |                            |
| Data / restraints / parameters  | 1617 / 0 / 127                                             |                            |
| Goodness-of-fit on F2           | 1.022                                                      |                            |

|                             |                                     |                           |
|-----------------------------|-------------------------------------|---------------------------|
| Final R indices             | 1029 data; $I > 2\sigma(I)$         | R1 = 0.0485, wR2 = 0.0749 |
|                             | all data                            | R1 = 0.1020, wR2 = 0.0894 |
| Weighting scheme            | where $P = (F_o^2 + 2F_c^2)/3$      |                           |
| Largest diff. peak and hole | 0.395 and -0.374 $e\text{\AA}^{-3}$ |                           |
| R.M.S. deviation from mean  | 0.089 $e\text{\AA}^{-3}$            |                           |

**(b) XRD data of 3m (CCDC No. 1909424)**

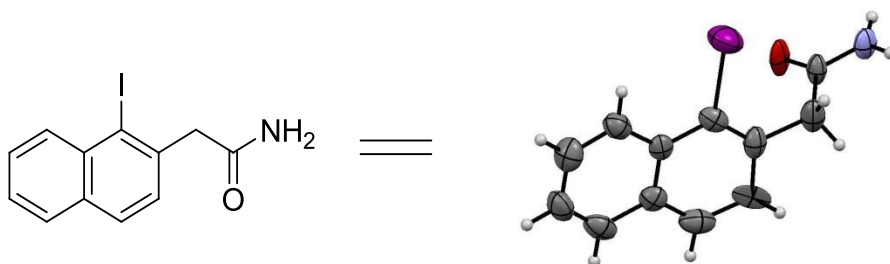

|                                        |                                        |                  |
|----------------------------------------|----------------------------------------|------------------|
| <b>Chemical formula</b>                | C <sub>12</sub> H <sub>10</sub> INO    |                  |
| <b>Formula weight</b>                  | 311.11 g/mol                           |                  |
| <b>Temperature</b>                     | 298(2) K                               |                  |
| <b>Wavelength</b>                      | 0.71073 Å                              |                  |
| <b>Crystal size</b>                    | 0.200 x 0.200 x 0.300 mm               |                  |
| <b>Crystal system</b>                  | monoclinic                             |                  |
| <b>Space group</b>                     | P 1 21/c 1                             |                  |
| <b>Unit cell dimensions</b>            | a = 14.336(7) Å                        | α = 90°          |
|                                        | b = 4.975(2) Å                         | β = 106.346(13)° |
|                                        | c = 16.193(8) Å                        | γ = 90°          |
| <b>Volume</b>                          | 1108.2(9) Å <sup>3</sup>               |                  |
| <b>Z</b>                               | 4                                      |                  |
| <b>Density (calculated)</b>            | 1.864 g/cm <sup>3</sup>                |                  |
| <b>Absorption coefficient</b>          | 2.861 mm <sup>-1</sup>                 |                  |
| <b>F(000)</b>                          | 600                                    |                  |
| <b>Theta range for data collection</b> | 2.96 to 24.55°                         |                  |
| <b>Index ranges</b>                    | -16 ≤ h ≤ 16, -5 ≤ k ≤ 5, -18 ≤ l ≤ 18 |                  |
| <b>Reflections collected</b>           | 15699                                  |                  |
| <b>Independent reflections</b>         | 1844 [R(int) = 0.0857]                 |                  |



|                                            |                                                                                                            |
|--------------------------------------------|------------------------------------------------------------------------------------------------------------|
| <b>Coverage of independent reflections</b> | 99.2%                                                                                                      |
| <b>Absorption correction</b>               | Multi-Scan                                                                                                 |
| <b>Max. and min. transmission</b>          | 0.5980 and 0.4810                                                                                          |
| <b>Structure solution technique</b>        | direct methods                                                                                             |
| <b>Structure solution program</b>          | SHELXS-97 (Sheldrick 2008)                                                                                 |
| <b>Refinement method</b>                   | Full-matrix least-squares on F <sup>2</sup>                                                                |
| <b>Refinement program</b>                  | SHELXL-2014 (Sheldrick 2014)                                                                               |
| <b>Function minimized</b>                  | $\Sigma w(F_o^2 - F_c^2)^2$                                                                                |
| <b>Data / restraints / parameters</b>      | 1844 / 0 / 136                                                                                             |
| <b>Goodness-of-fit on F<sup>2</sup></b>    | 1.021                                                                                                      |
| <b>Final R indices</b>                     | 1121 data;<br>I > 2 $\sigma$ (I)      R1 = 0.0533, wR2 = 0.1006<br>all data      R1 = 0.1149, wR2 = 0.1204 |
| <b>Weighting scheme</b>                    | $w = 1 / [\sigma^2(F_o^2) + (0.0499P)^2 + 3.3221P]$<br>where $P = (F_o^2 + 2F_c^2) / 3$                    |
| <b>Largest diff. peak and hole</b>         | 0.711 and -0.421 e $\text{\AA}^{-3}$                                                                       |
| <b>R.M.S. deviation from mean</b>          | 0.109 e $\text{\AA}^{-3}$                                                                                  |

#### Alert level A

PLAT213\_ALERT\_2\_A Atom C12 has ADP max/min Ratio ..... 12.2 prolat

Explanation: The high variation in ADP max/min ratio of C12 caused by large anisotropic thermal displacements.

#### 10. Reaction monitoring by <sup>1</sup>H NMR experiment.

To gain insight into to reaction mechanism, the reaction of phenylacetamide (0.25 mmol) was performed, and <sup>1</sup>H NMR was recorded every 30 minutes after sequential addition of catalyst and reagents. Initially, phenylacetamide was stirred with 5 mol% of Pd(OAc)<sub>2</sub> in CDCl<sub>3</sub> for 30 min at 50 °C. No changes in NMR spectra was observed [Fig. 2(b)]. Then, we added 10.0 equiv of TFA to the reaction mixture and again stirred for 30 min at 50 °C. <sup>1</sup>H NMR spectrum shows the

formation of corresponding imidic acid [Fig. 2(c)]. Further, we added 1.2 equiv of NBS in reaction mixture and reaction was further stirred for 30 min. at 50 °C. Then,  $^1\text{H}$  NMR of the crude reaction mixture was recorded and spectrum revealed that the formation of the desired product started within stipulated time [Fig. 2(d)].

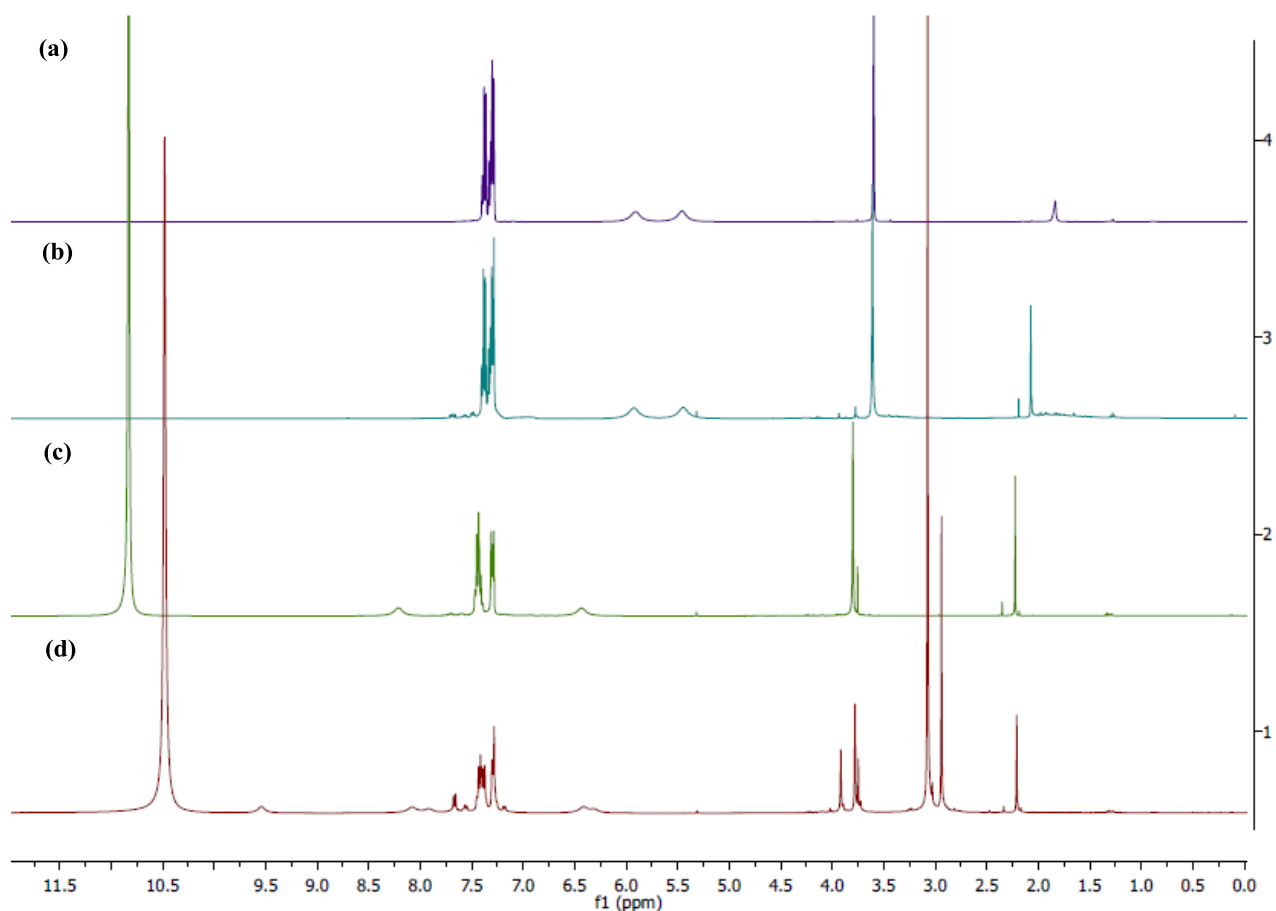

Figure 2. (a)  $^1\text{H}$  NMR of pure **1a**. (b)  $^1\text{H}$  NMR of **1a** with 5 mol % of  $\text{Pd}(\text{OAc})_2$ . (c)  $^1\text{H}$  NMR of **1a** with  $\text{Pd}(\text{OAc})_2$  and TFA (10.0 equiv). (d)  $^1\text{H}$  NMR of **1a** with  $\text{Pd}(\text{OAc})_2$ , TFA (10.0 equiv) and NBS (1.2 equiv).

## 11. DFT details

Phenylacetamide tautomerizes to form imidic acid in the presence of trifluoroacetic acid. The imidic acid has three possible coordinating sites: (a) imidic nitrogen (=NH) (b) oxygen (c) nitrogen atom of amide to form a six-membered palladacycle intermediate. In reaction mixture, palladium trifluoroacetate may coordinate to these three possible sites resulting in chemical species **A**, **A'** and **A''** respectively. We have performed DFT calculation to find the relative free energy of **A**, **A'** and **A''** (Figure 1). DFT calculation revealed that formation of **A** is more exothermic than **A'** and exothermicity equals to  $\Delta H = -3.78$  kcal/mole. In addition, the formation of **A'** is more exothermic than **A''** and  $\Delta H = -3.84$  kcal/mole. The relative free energy change between **A** and **A'** is  $\Delta G = 3.6$  kcal/mol, for **A'** and **A''**  $\Delta G$  is 5.9 kcal/mole. These results conclude that formation of species **A** is more favored than **A'**, which prefer to form over **A''** in the reaction mixture.

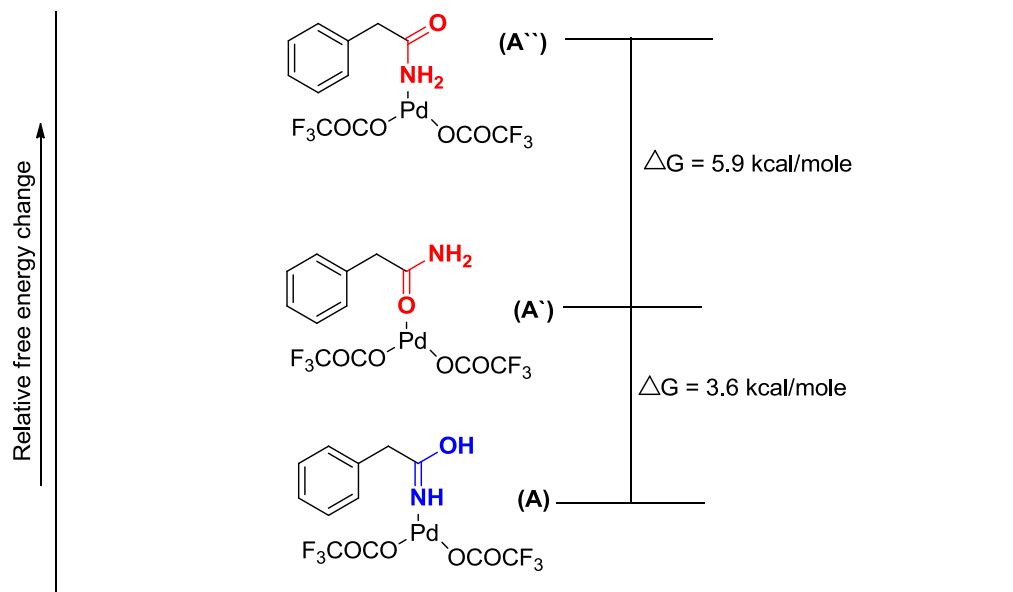

Figure S1. Coordination mode primary amide with Pd(TFA)<sub>2</sub> in reaction mixture.

### Computational Details

All the calculations were carried out with Gaussian 16<sup>1</sup>. All geometry optimizations were performed using B3LYP<sup>2</sup> level of theory of DFT method in gas phase. The LANL2DZ<sup>3</sup> basis set with effective core potential (ECP) was used for Pd, and the 6-31G (d)<sup>4</sup> basis set was used for all H, C, N, F, and O atoms. Frequency analysis was conducted at the same level of theory to verify that the stationary points are minima. Solvent effects were computed using the same DFT method and basis sets in ClCH<sub>2</sub>CH<sub>2</sub>Cl with the integral equation formalism for the polarizable continuum model (IEF-PCM)<sup>5</sup> at 323.15 K. Frequency analysis were carried out at the same level to evaluate the zero-point vibrational energy and thermal corrections at 323.15 K. The relative Gibbs free energies are given in kcal/mol. Computed structures are visualized using GaussView0.5.<sup>6</sup>

**Cartesian coordinates and Energy (in hartrees unit) of Complex A:**

| Symbol | X          | Y         | Z          |
|--------|------------|-----------|------------|
| C      | -3.2791270 | 2.2049650 | 0.8524900  |
| C      | -2.0779420 | 2.7975330 | 0.4381090  |
| C      | -2.0285290 | 3.4252390 | -0.8152130 |
| C      | -3.1564470 | 3.4594620 | -1.6373640 |
| C      | -4.3492330 | 2.8678820 | -1.2142190 |
| C      | -4.4085590 | 2.2404640 | 0.0324430  |
| H      | -3.3320050 | 1.7205930 | 1.8246550  |
| H      | -1.1051790 | 3.8961350 | -1.1443410 |
| H      | -3.1044190 | 3.9529530 | -2.6037730 |
| H      | -5.2284250 | 2.8977770 | -1.8516430 |
| H      | -5.3336500 | 1.7807820 | 0.3686440  |
| C      | 0.1036620  | 1.6125720 | 1.1215790  |

|    |            |            |            |
|----|------------|------------|------------|
| C  | -0.8576390 | 2.7696520  | 1.3305920  |
| H  | -0.2602930 | 3.6816320  | 1.2107810  |
| H  | -1.1435160 | 2.7328590  | 2.3887310  |
| C  | 3.4980090  | 0.0829960  | 0.1763680  |
| O  | 3.3241570  | 0.4093050  | 1.3555130  |
| O  | 2.6471610  | -0.3408740 | -0.6772160 |
| C  | -1.9944870 | -1.6939390 | -0.2947820 |
| O  | -0.9023750 | -1.9982680 | 0.3276390  |
| C  | 4.9246090  | 0.1811370  | -0.4227670 |
| O  | -2.2043150 | -0.7885770 | -1.0912060 |
| C  | -3.1420460 | -2.6604850 | 0.1013690  |
| Pd | 0.8153680  | -1.0466340 | -0.1211160 |
| F  | -2.8028040 | -3.9394740 | -0.1565150 |
| F  | -3.4089790 | -2.5619580 | 1.4197140  |
| F  | -4.2658370 | -2.3839850 | -0.5726950 |
| F  | 4.9331360  | 1.0271000  | -1.4702680 |
| F  | 5.8081180  | 0.6220700  | 0.4803640  |
| F  | 5.3336500  | -1.0260840 | -0.8583740 |
| O  | 1.1079890  | 1.6316990  | 1.9604210  |
| N  | -0.0688330 | 0.7188710  | 0.2011490  |
| H  | -0.9233790 | 0.7880910  | -0.3525200 |
| H  | 1.8556390  | 0.9920650  | 1.7299200  |

Absolute Free Energy: -1619.274784 Hartree

Absolute Enthalpy: -1619.175028 Hartree

**Cartesian coordinates and Energy (in hartrees unit) of Complex A`**

| Symbol | X          | Y          | Z          |
|--------|------------|------------|------------|
| C      | 1.1764720  | 3.9217080  | -0.2554290 |
| C      | -0.0246230 | 3.1975970  | -0.2067150 |
| C      | -1.2395410 | 3.8984530  | -0.2538600 |
| C      | -1.2537140 | 5.2914860  | -0.3483590 |
| C      | -0.0518070 | 6.0024860  | -0.3965380 |
| C      | 1.1636260  | 5.3147890  | -0.3498540 |
| H      | 2.1239980  | 3.3889180  | -0.2284660 |
| H      | -2.1765320 | 3.3474080  | -0.2258150 |
| H      | -2.2022410 | 5.8196130  | -0.3896800 |
| H      | -0.0623250 | 7.0861400  | -0.4733870 |
| H      | 2.1017630  | 5.8610690  | -0.3922690 |
| C      | -0.0043820 | 1.1212020  | 1.3012850  |
| O      | 0.0025800  | -0.1239690 | 1.5391340  |
| N      | -0.0060160 | 1.9510220  | 2.3382010  |
| H      | -0.0016530 | 1.5855070  | 3.2825710  |
| H      | -0.0120630 | 2.9527770  | 2.1972560  |
| C      | -0.0103930 | 1.6887710  | -0.1020750 |
| H      | -0.8830170 | 1.2435680  | -0.5979380 |
| H      | 0.8697320  | 1.2596430  | -0.5987840 |
| C      | 2.7917040  | -1.0733840 | -0.4677900 |
| O      | 2.5065120  | -0.1542430 | -1.2225020 |
| O      | 2.0180520  | -1.8235600 | 0.2452300  |
| C      | -2.7743580 | -1.1093940 | -0.4681270 |
| O      | -2.5012030 | -0.1864200 | -1.2224770 |

|    |            |            |            |
|----|------------|------------|------------|
| C  | 4.2783200  | -1.4722020 | -0.2617070 |
| O  | -1.9906570 | -1.8510610 | 0.2427380  |
| C  | -4.2558910 | -1.5256240 | -0.2599990 |
| Pd | 0.0125890  | -1.6665230 | 0.1552270  |
| F  | -4.6146580 | -1.3792170 | 1.0320040  |
| F  | -5.0806920 | -0.7784060 | -1.0064340 |
| F  | -4.4435600 | -2.8179840 | -0.5960510 |
| F  | 4.4797010  | -2.7645560 | -0.5894190 |
| F  | 5.0925650  | -0.7208420 | -1.0154510 |
| F  | 4.6389320  | -1.3126670 | 1.0283170  |

Absolute Free Energy: -1619.269018 Hartree

Absolute Enthalpy: -1619.169002 Hartree

**Cartesian coordinates and Energy (in hartrees unit) of Complex A<sup>++</sup>**

| Symbol | X         | Y          | Z          |
|--------|-----------|------------|------------|
| C      | 3.9827900 | -0.3679440 | 0.3491840  |
| C      | 3.2108470 | -1.5018270 | 0.6308640  |
| C      | 3.7764050 | -2.7745080 | 0.4653580  |
| C      | 5.0942200 | -2.9098960 | 0.0281790  |
| C      | 5.8619540 | -1.7746990 | -0.2483050 |
| C      | 5.3037610 | -0.5055120 | -0.0857880 |
| H      | 3.5565390 | 0.6233680  | 0.4716220  |
| H      | 3.1820590 | -3.6587220 | 0.6800090  |
| H      | 5.5218580 | -3.9011950 | -0.0937650 |
| H      | 6.8889600 | -1.8800950 | -0.5865710 |
| H      | 5.8941410 | 0.3817460  | -0.2968380 |

|    |            |            |            |
|----|------------|------------|------------|
| C  | 0.8040740  | -1.9843250 | 0.1368350  |
| C  | 1.7726310  | -1.3617200 | 1.1236410  |
| H  | 1.6383090  | -1.8952030 | 2.0696140  |
| H  | 1.5294290  | -0.3092840 | 1.2893700  |
| C  | -3.7786960 | -1.4449830 | -0.4336950 |
| O  | -4.6276820 | -2.2602320 | -0.7416690 |
| O  | -2.5174400 | -1.5007210 | -0.7387600 |
| C  | 0.8606320  | 2.0198530  | -0.4318710 |
| O  | -0.2238450 | 1.6889510  | 0.1737970  |
| C  | -4.2272870 | -0.2494530 | 0.4565690  |
| O  | 1.4974300  | 1.3984000  | -1.2830670 |
| C  | 1.4597860  | 3.3556010  | 0.0790810  |
| Pd | -1.3192570 | 0.0526720  | -0.2933840 |
| F  | 2.0091360  | 4.0450660  | -0.9306190 |
| F  | 0.5573940  | 4.1380630  | 0.6856260  |
| F  | 2.4366360  | 3.0731310  | 0.9724980  |
| F  | -5.4709520 | 0.1315310  | 0.2033600  |
| F  | -4.1102910 | -0.5474370 | 1.7552000  |
| F  | -3.4213650 | 0.8764790  | 0.2459130  |
| O  | 0.4549700  | -3.1405760 | 0.1418110  |
| N  | 0.3065800  | -1.1005670 | -0.9072860 |
| H  | 0.9697970  | -0.3650540 | -1.2185010 |
| H  | -0.0405120 | -1.6561010 | -1.6933120 |

Absolute Free Energy: -1619.259533 Hartree

Absolute Enthalpy: -1619.162867 Hartree



## 12. References

1. M. J. Frisch, G. W. Trucks, H. B. Schlegel, G. E. Scuseria, M. A. Robb, J. R. Cheeseman, G. Scalmani, V. Barone, G. A. Petersson, H. Nakatsuji, X. Li, M. Caricato, A. V. Marenich, J. Bloino, B. G. Janesko, R. Gomperts, B. Mennucci, H. P. Hratchian, J. V. Ortiz, A. F. Izmaylov, J. L. Sonnenberg, D. Williams-Young, F. Ding, F. Lipparini, F. Egidi, J. Goings, B. Peng, A. Petrone, T. Henderson, D. Ranasinghe, V. G. Zakrzewski, J. Gao, N. Rega, G. Zheng, W. Liang, M. Hada, M. Ehara, K. Toyota, R. Fukuda, J. Hasegawa, M. Ishida, T. Nakajima, Y. Honda, O. Kitao, H. Nakai, T. Vreven, K. Throssell, A. Montgomery, J. Jr., J. E. Peralta, F. Ogliaro, M. J. Bearpark, J. J. Heyd, E. N. Brothers, K. N. Kudin, V. N. Staroverov, T. A. Keith, R. Kobayashi, J. Normand, K. Raghavachari, A. P. Rendell, J. C. Burant, S. S. Iyengar, J. Tomasi, M. Cossi, J. M. Millam, M. Klene, C. Adamo, R. Cammi, J. W. Ochterski, R. L. Martin, K. Morokuma, O. Farkas, J. B. Foresman and D. J. Fox, Gaussian 16, Revision A.03, Gaussian, Inc., Wallingford, CT, 2016.
2. a) C. Lee, W. Yang and R. G. Parr, *Matter Mater. Phys.*, 1988, **37**, 785; b) A. D. Becke, *J. Chem. Phys.*, 1993, **98**, 1372.; c) A. D. Becke, *J. Chem. Phys.*, 1993, **98**, 5648.; d) P. J. Stephens, F. J. Devlin, C. F. Chabalowski and M. J. Frisch, *J. Phys. Chem.*, 1994, **98**, 11623.
3. P. J. Hay and W. R. J. Wadt, *J. Chem. Phys.*, 1985, **82**, 270.
4. a) R. Ditchfield, W. J. Hehre and J. A. Pople, *J. Chem. Phys.* 1971, **54**, 724.; b) P. C. Hariharan and J. A. Pople, *Theor. Chim. Acta.*, 1973, **28**, 213.
5. a) E. Cancès, B. Mennucci and J. Tomasi, *J. Chem. Phys.* 1997, **107**, 3032.; b) M. Cossi, V. Barone, R. Cammi and J. Tomasi, *J. Chem. Phys. Lett.* 1996, **255**, 327.; c) V. Barone, M. Cossi and J. Tomasi, *J. Comput. Chem.* 1998, **19**, 404.

6. R. Dennington, T. Keith and J. Millam, GaussView, Version 5, Semichem Inc., Shawnee Mission KS, 2009.

### 13. NMR spectra

$^1\text{H}$  and  $^{13}\text{C}\{\text{H}\}$  spectra of **2a**

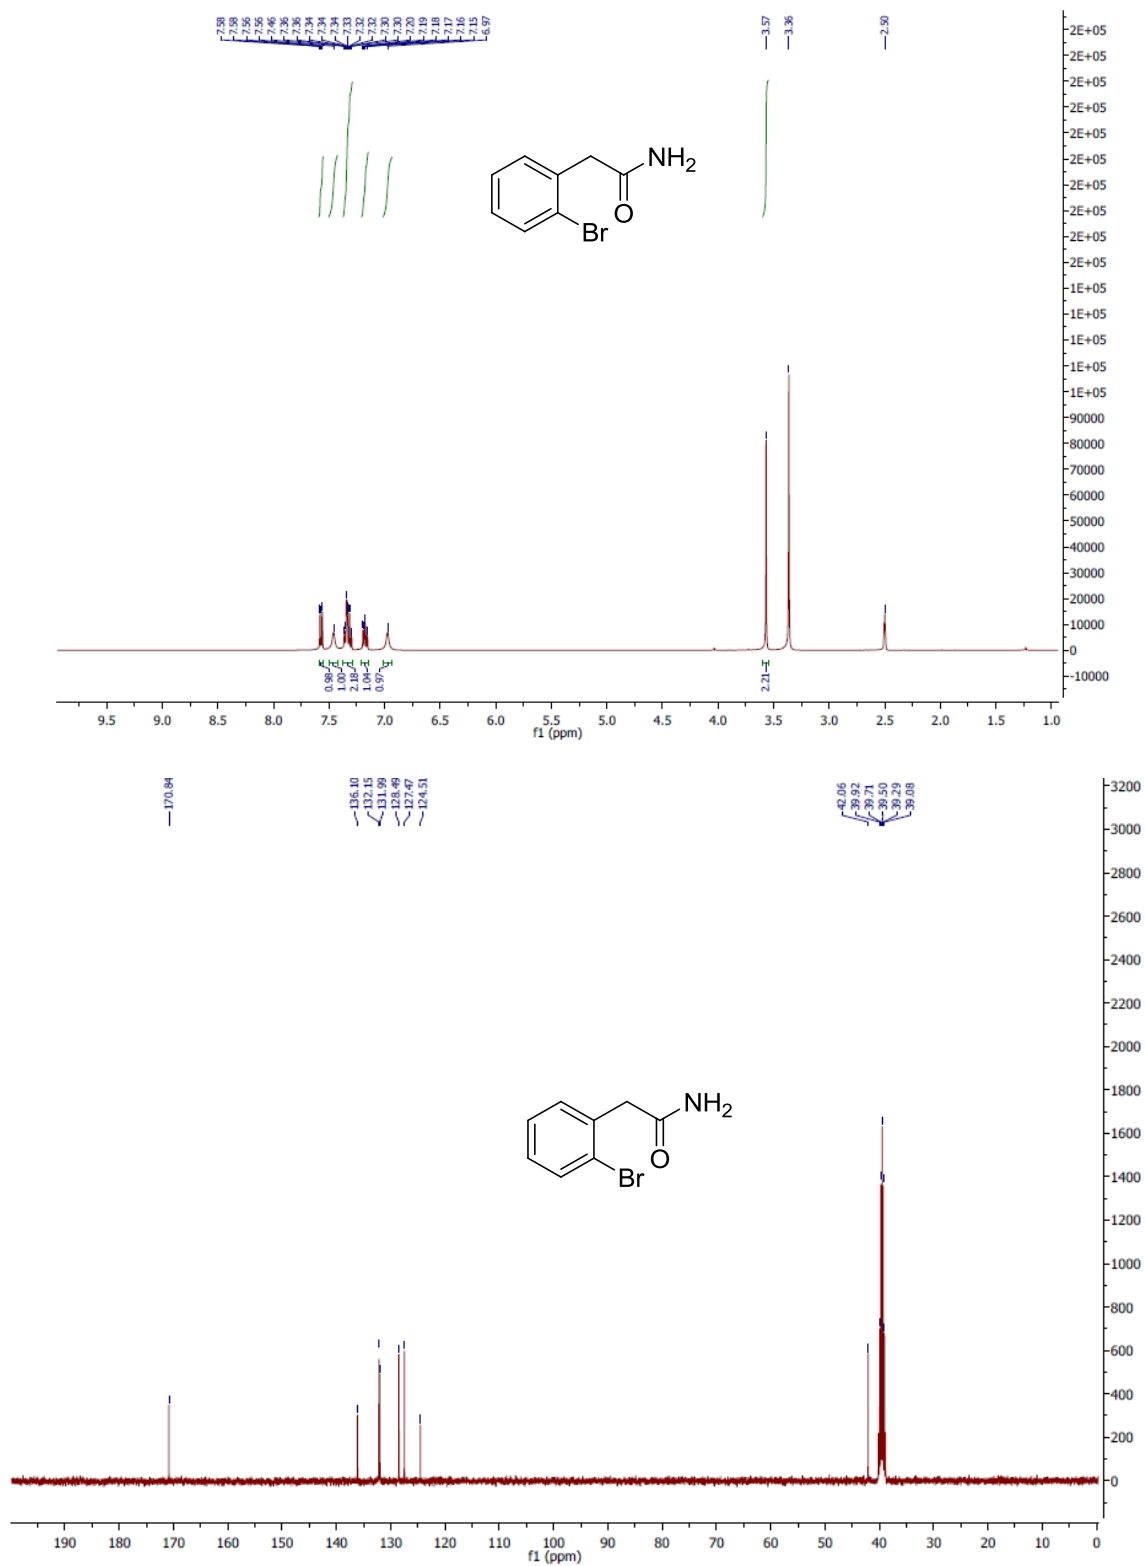

$^1\text{H}$  and  $^{13}\text{C}\{\text{H}\}$  spectra of **2aa**

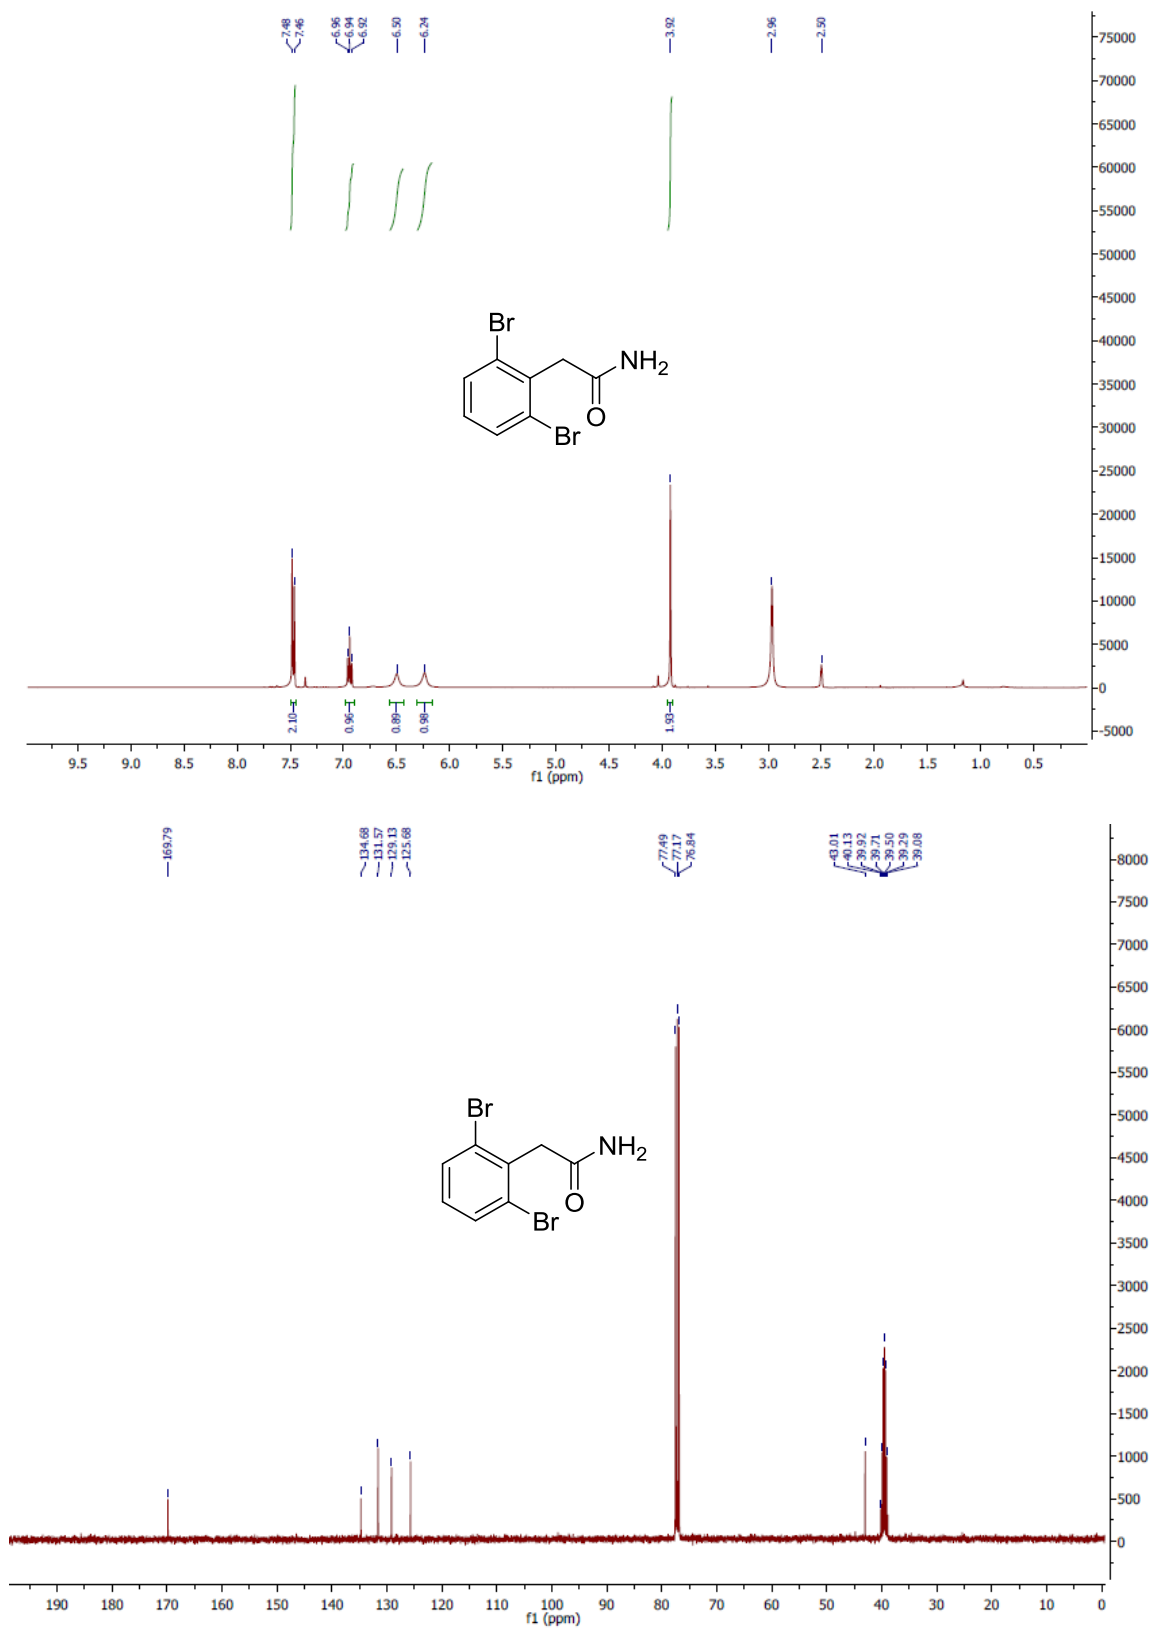

$^1\text{H}$  and  $^{13}\text{C}\{\text{H}\}$  spectra of **2b**

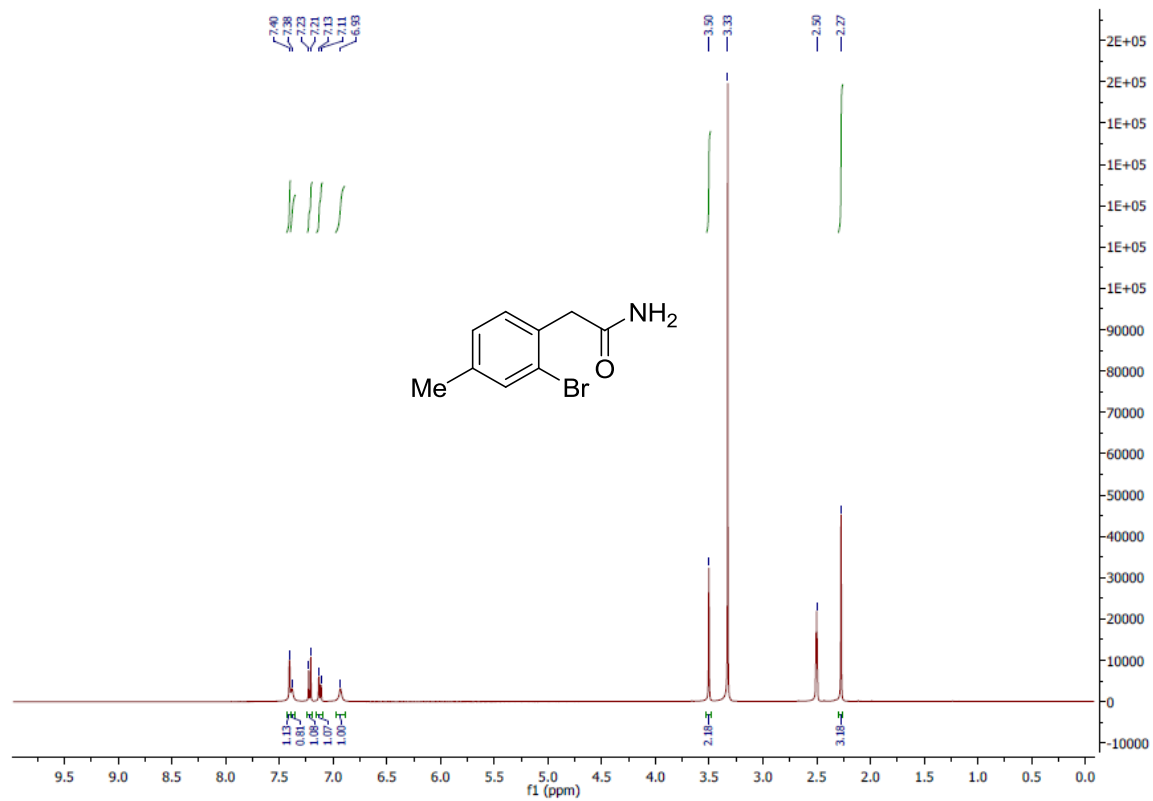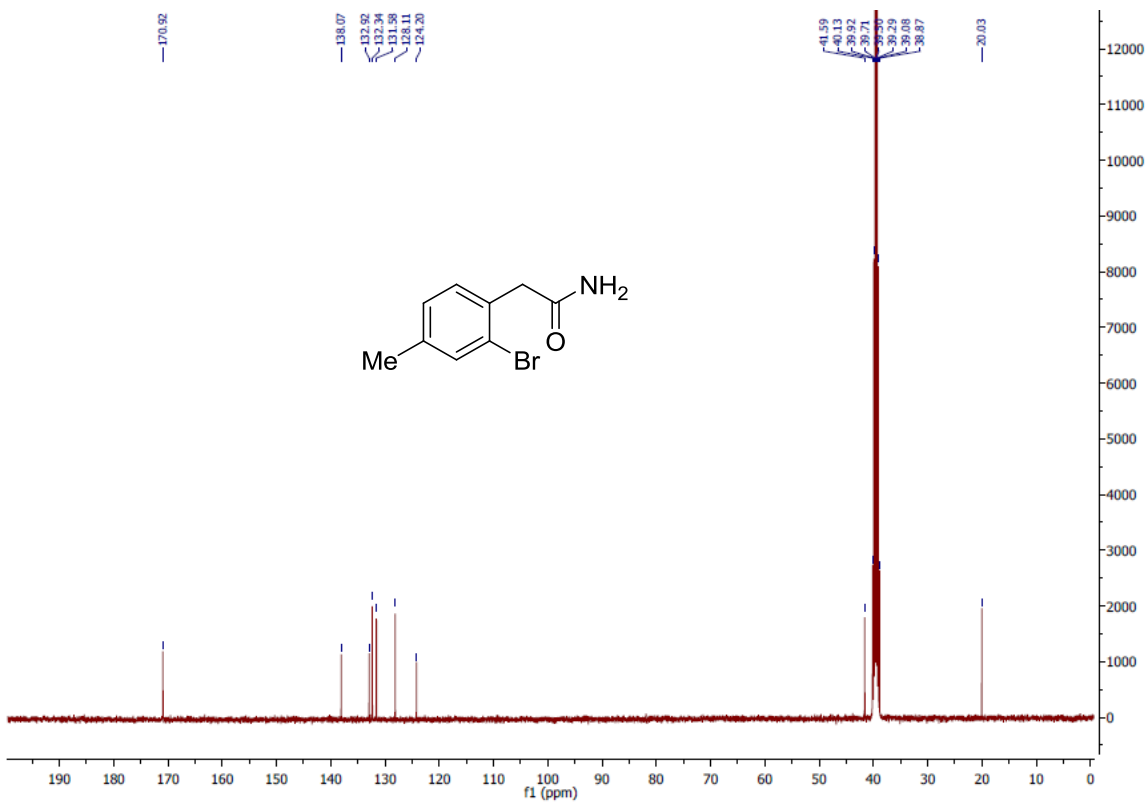

$^1\text{H}$  and  $^{13}\text{C}\{\text{H}\}$  spectra of **2bb**

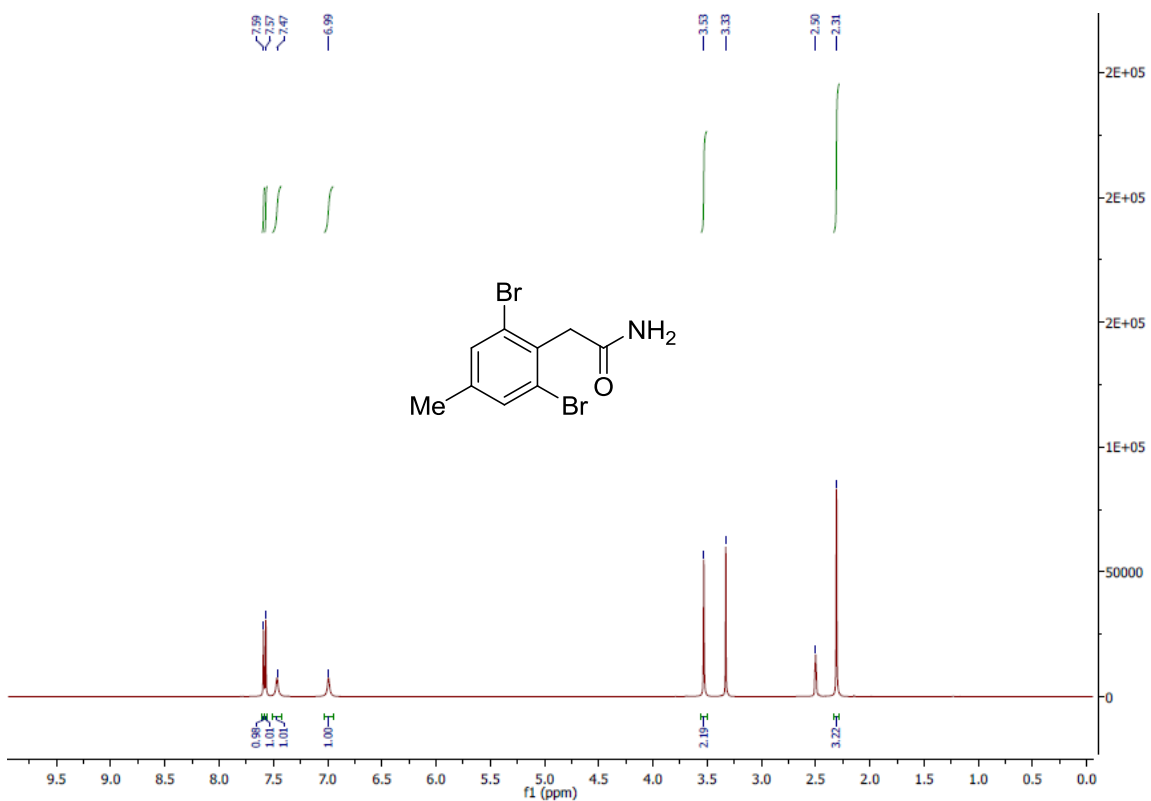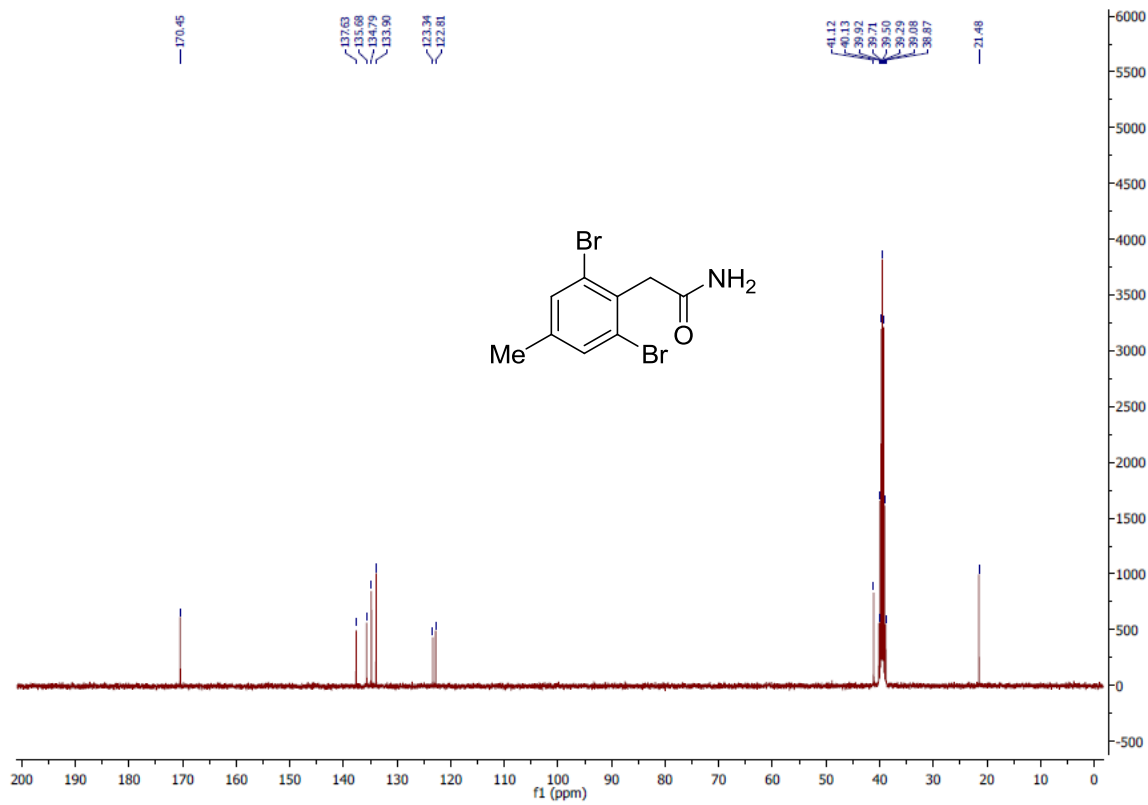

$^1\text{H}$  and  $^{13}\text{C}\{\text{H}\}$  spectra of **2c**

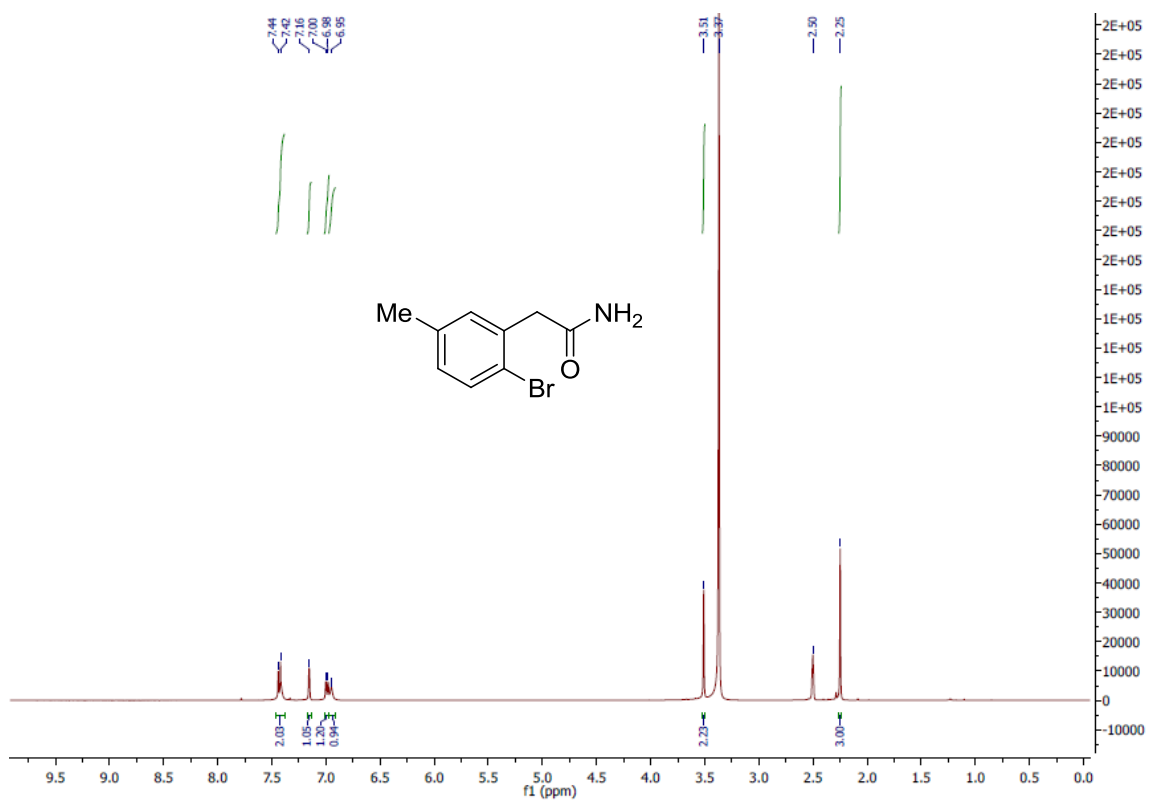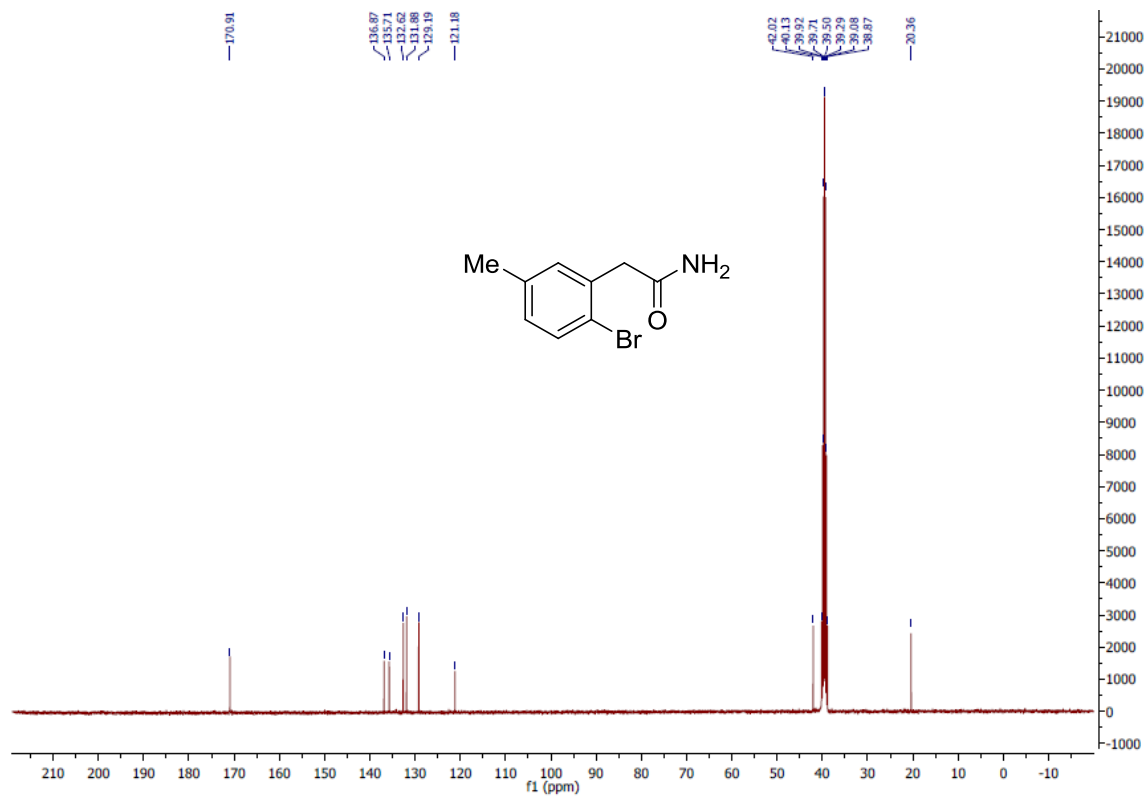

$^1\text{H}$  and  $^{13}\text{C}\{\text{H}\}$  spectra of **2d**

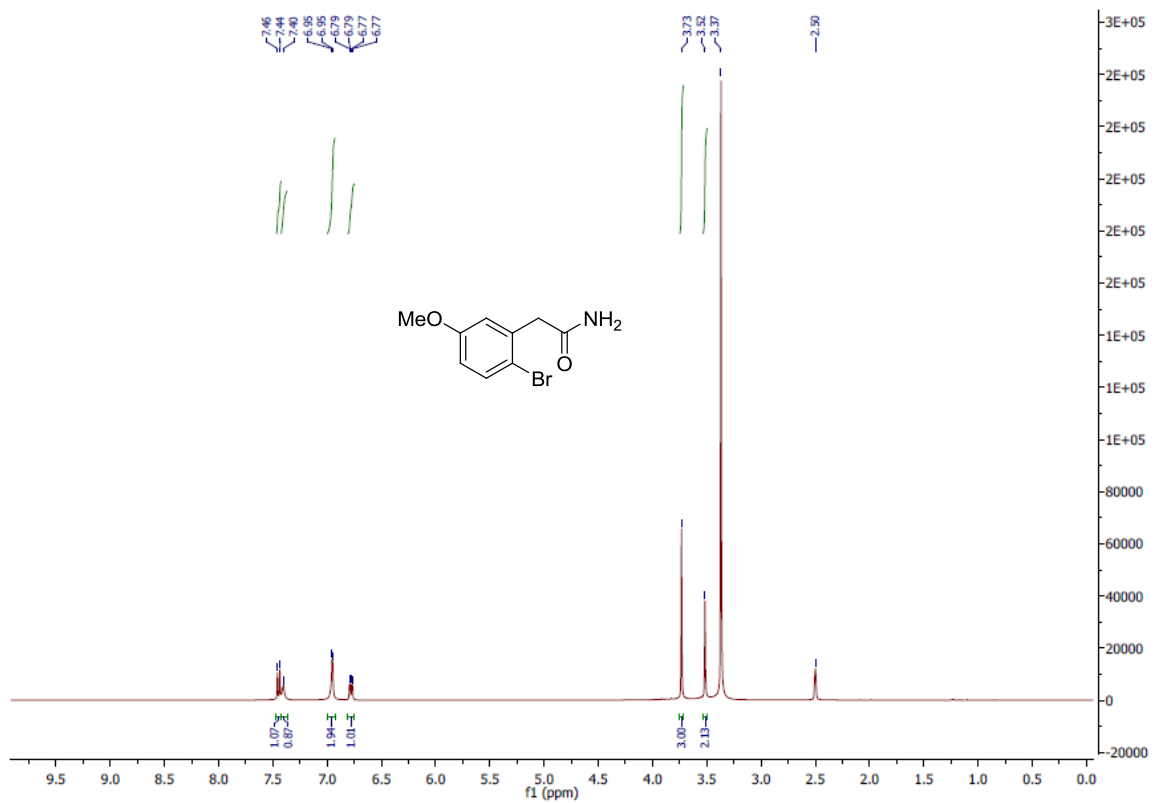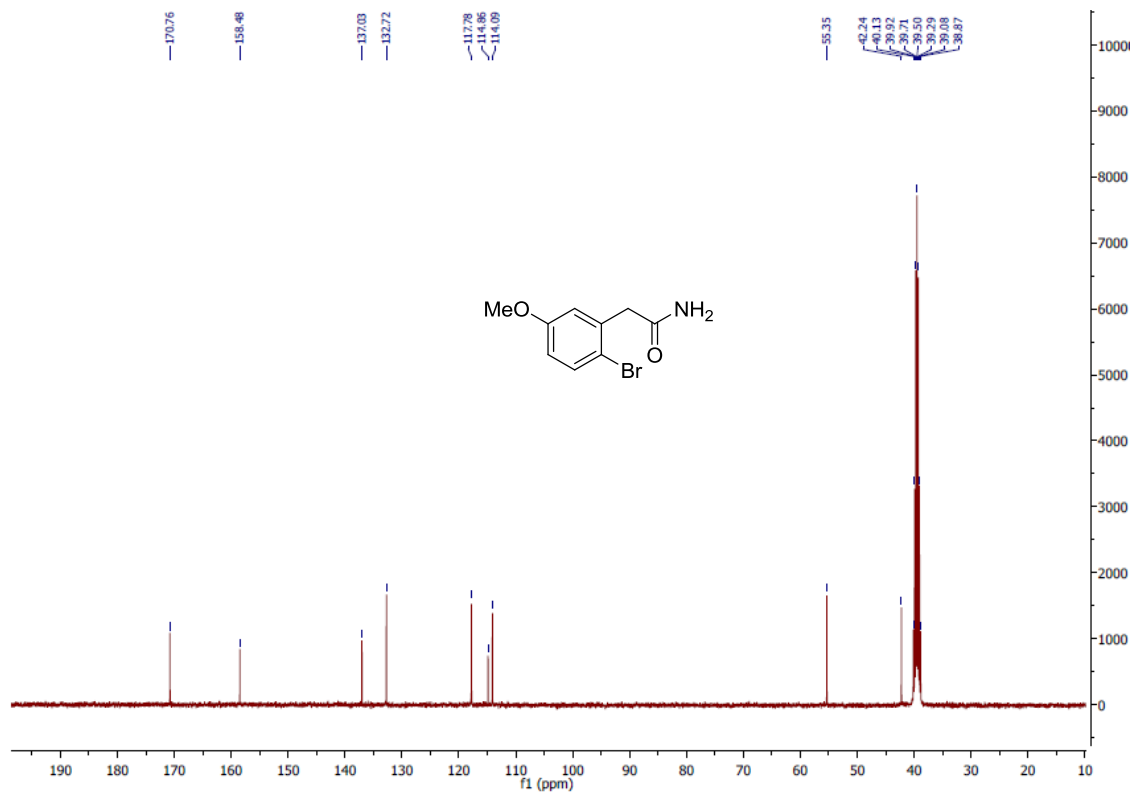



$^1\text{H}$  and  $^{13}\text{C}\{\text{H}\}$  spectra of **2e**

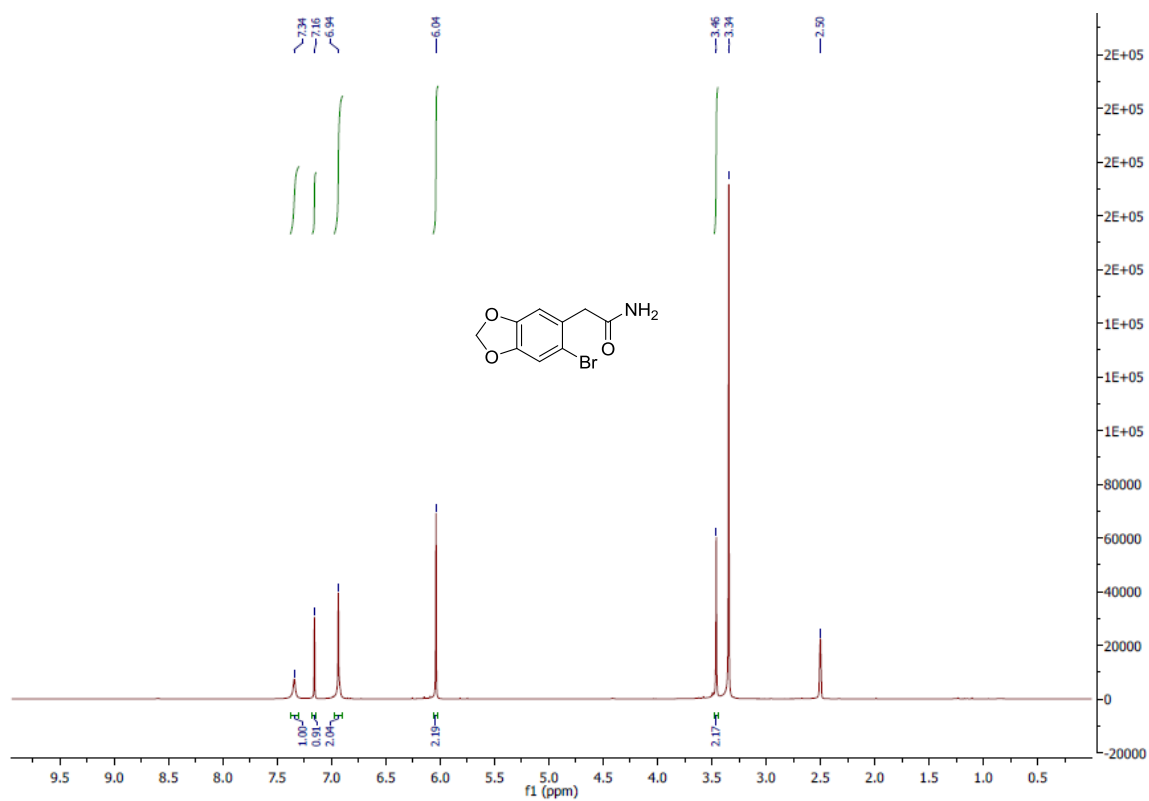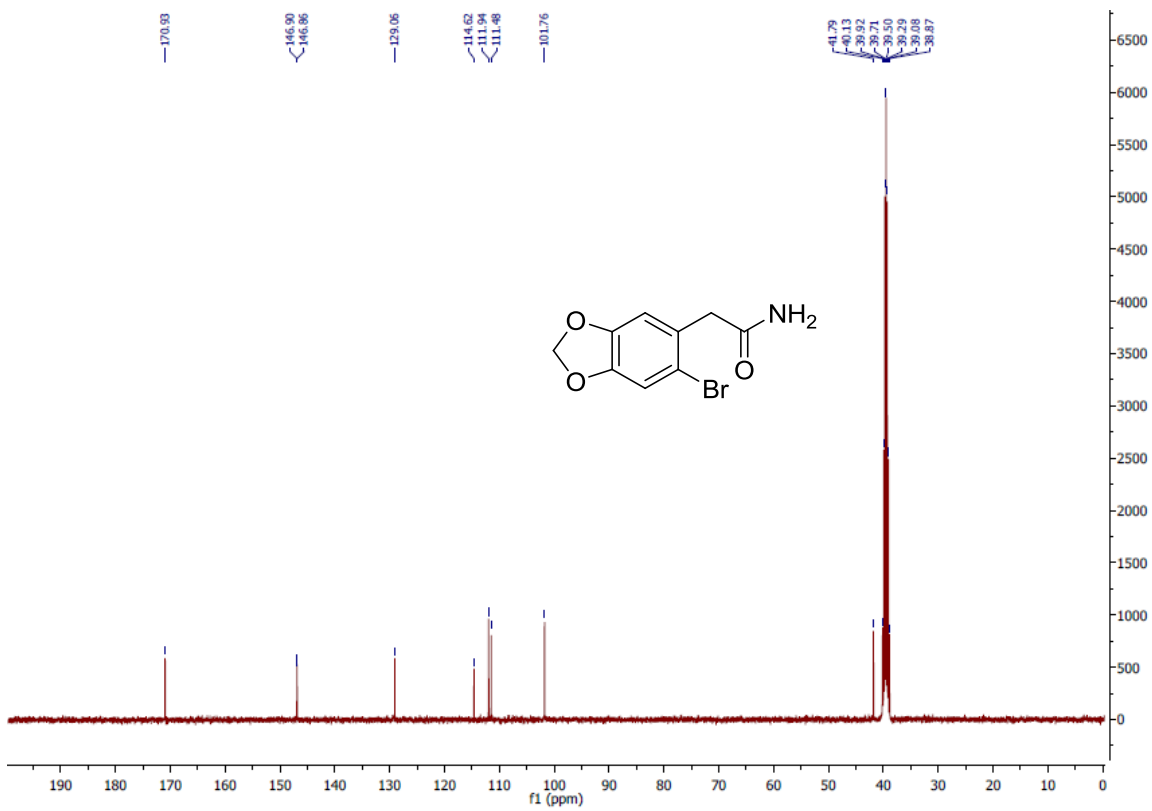

$^1\text{H}$  and  $^{13}\text{C}\{\text{H}\}$  spectra of **2f**

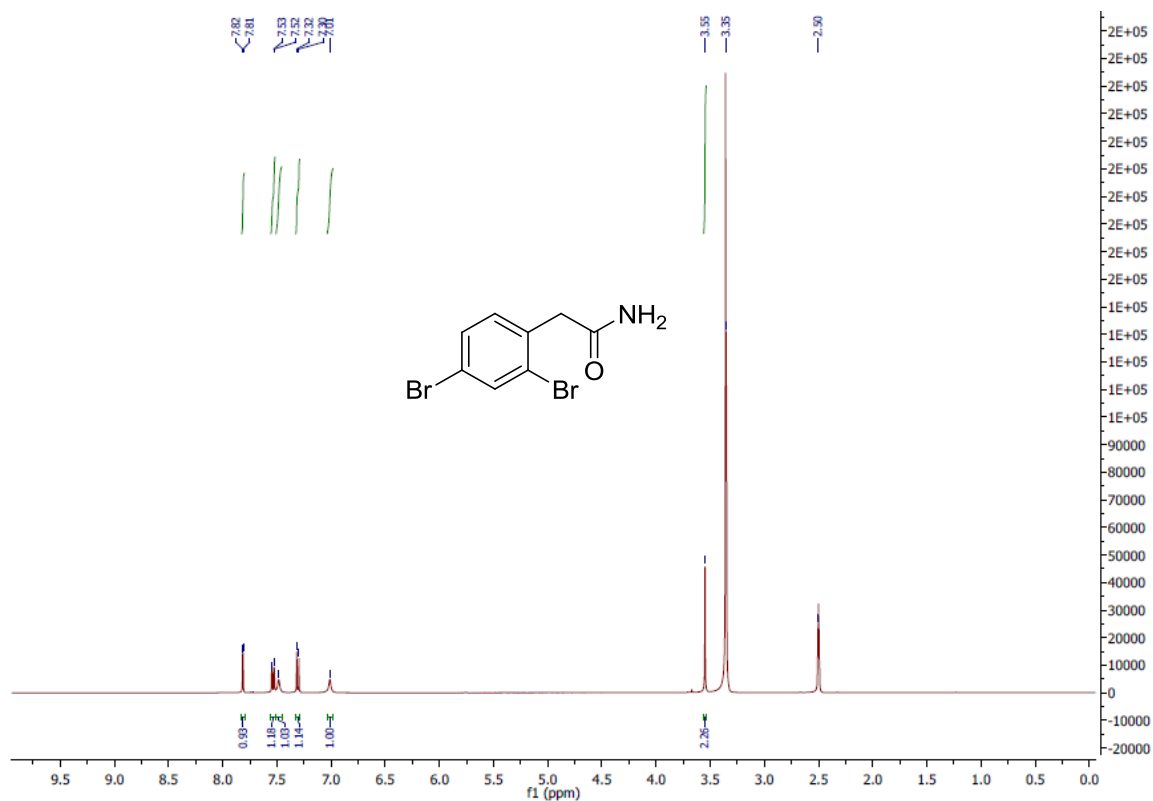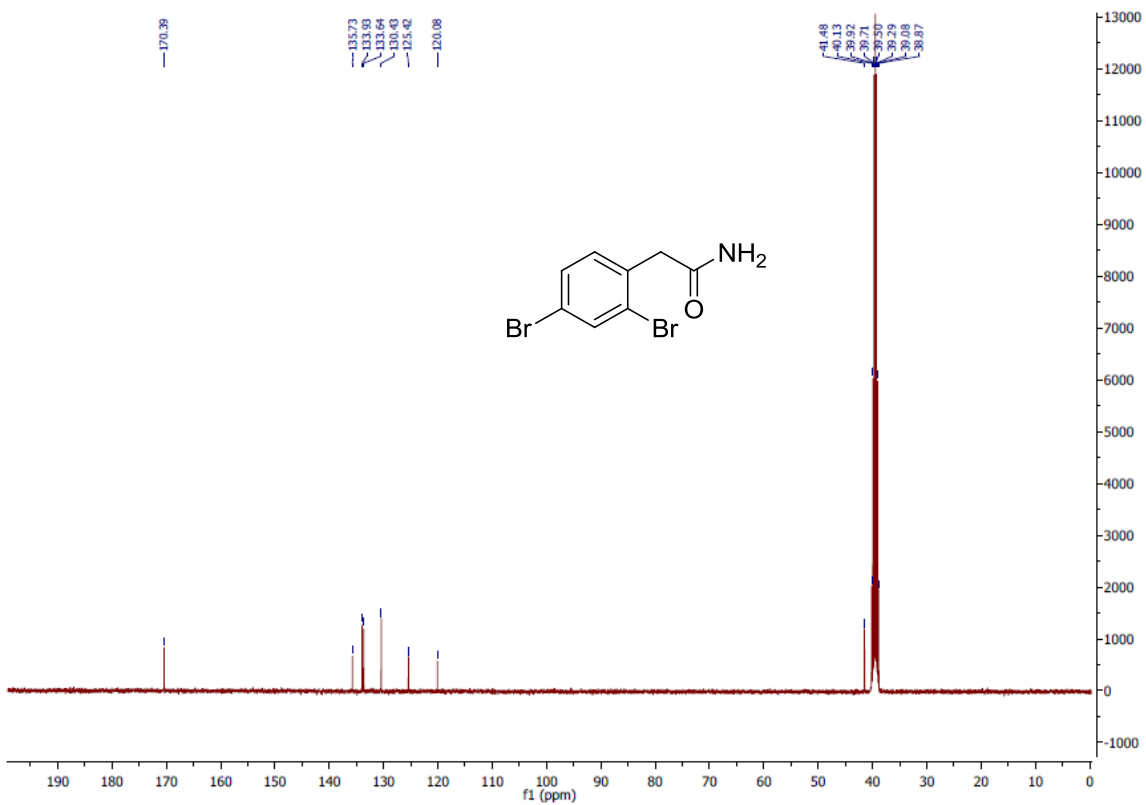

$^1\text{H}$  and  $^{13}\text{C}\{\text{H}\}$  spectra of **2g**

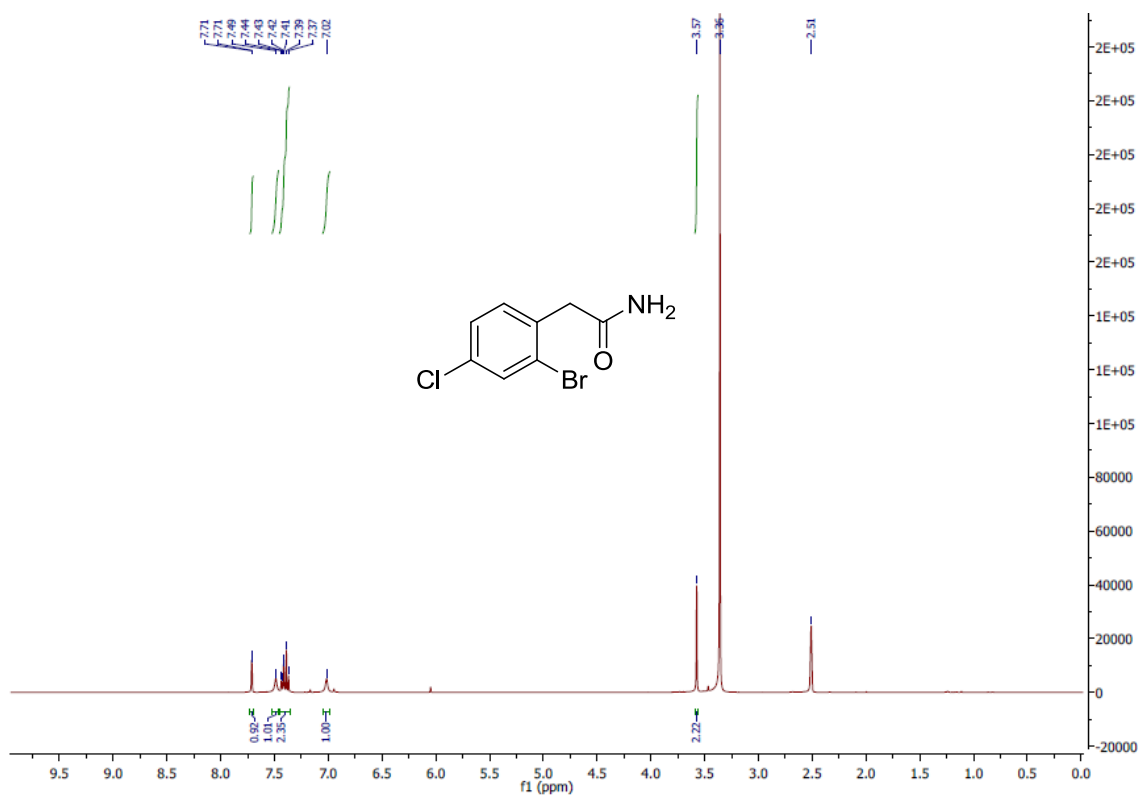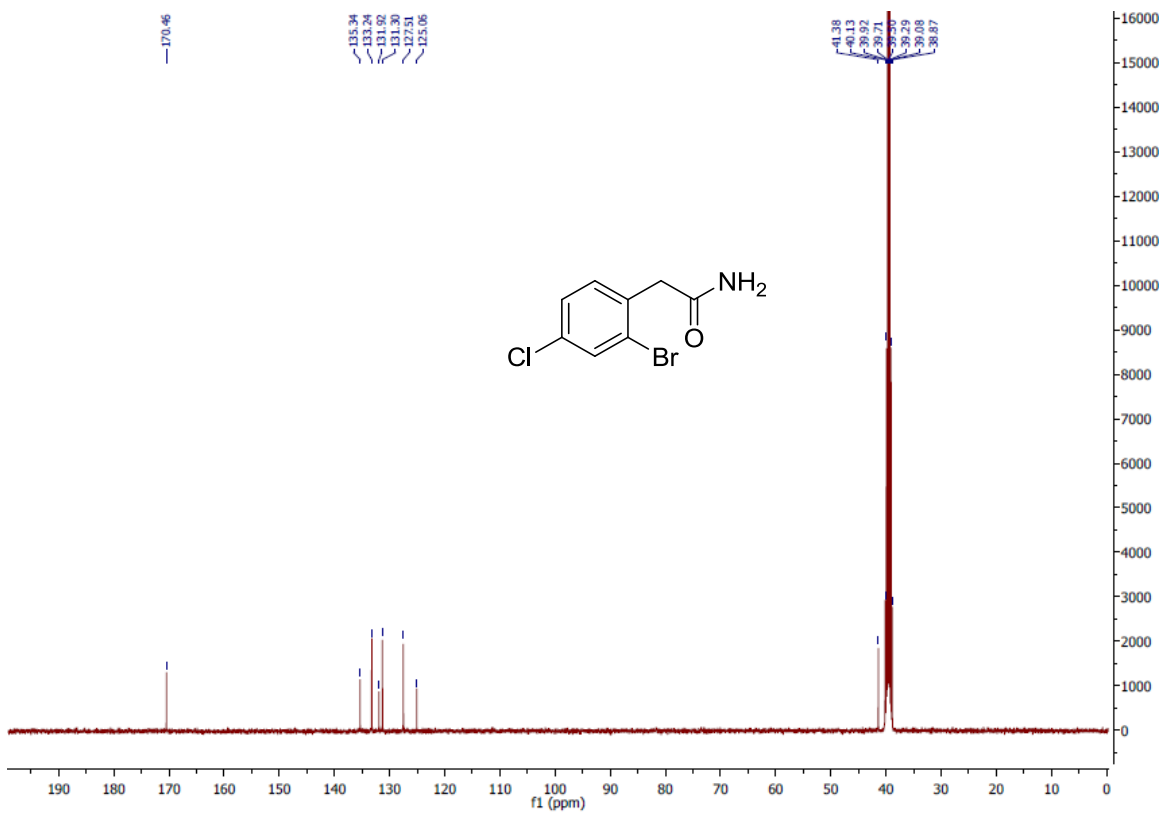

$^1\text{H}$  and  $^{13}\text{C}\{\text{H}\}$  spectra of **2h**

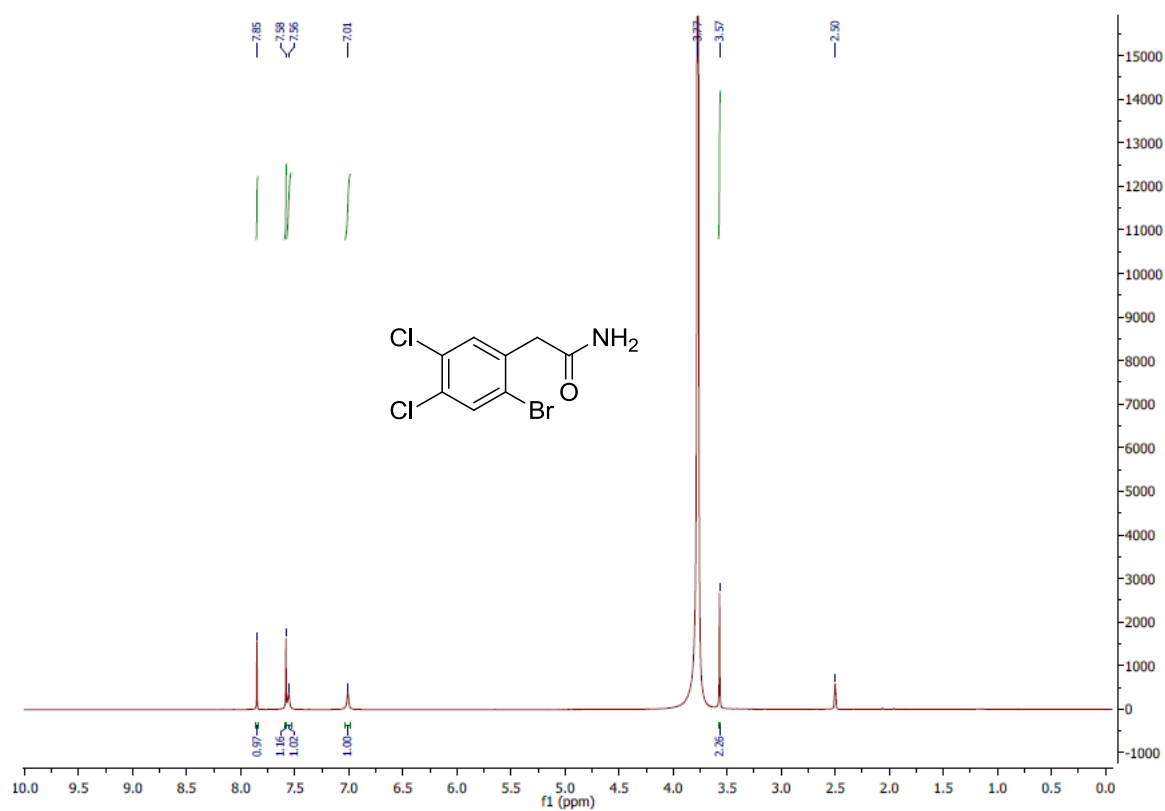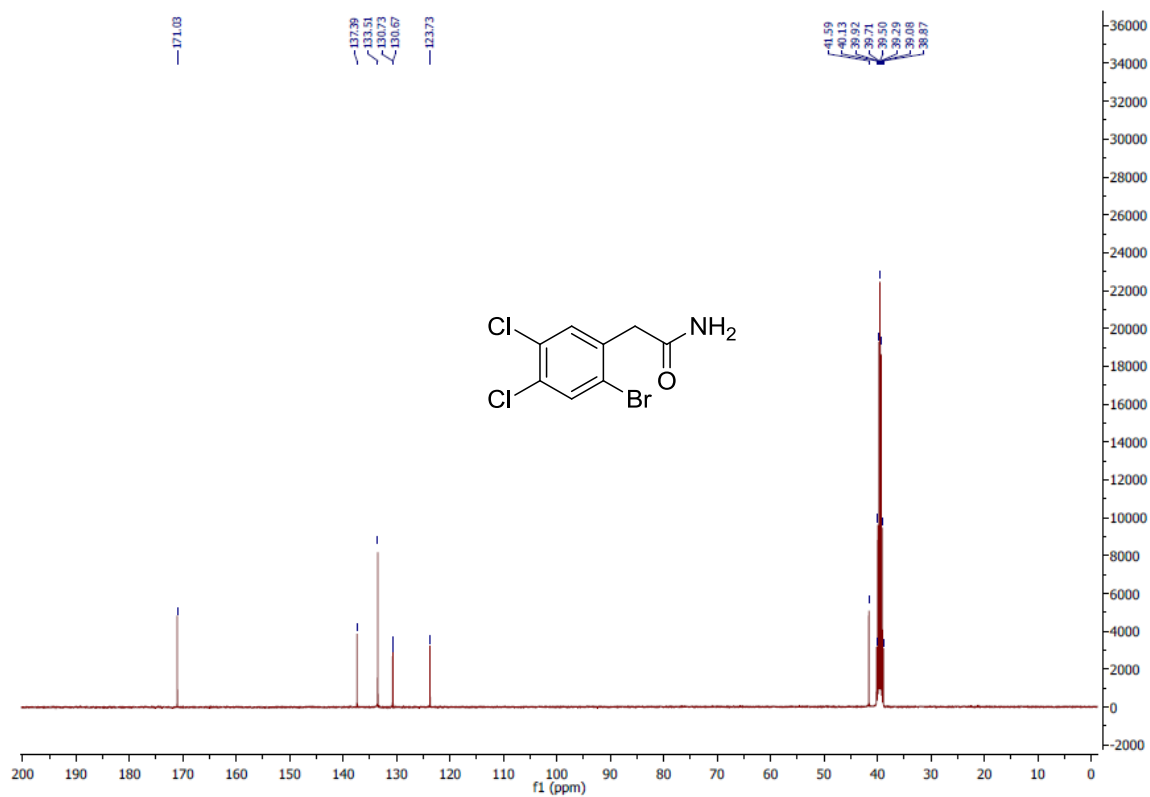

$^1\text{H}$ ,  $^{13}\text{C}\{\text{H}\}$  and  $^{19}\text{F}$  spectra of **2i**

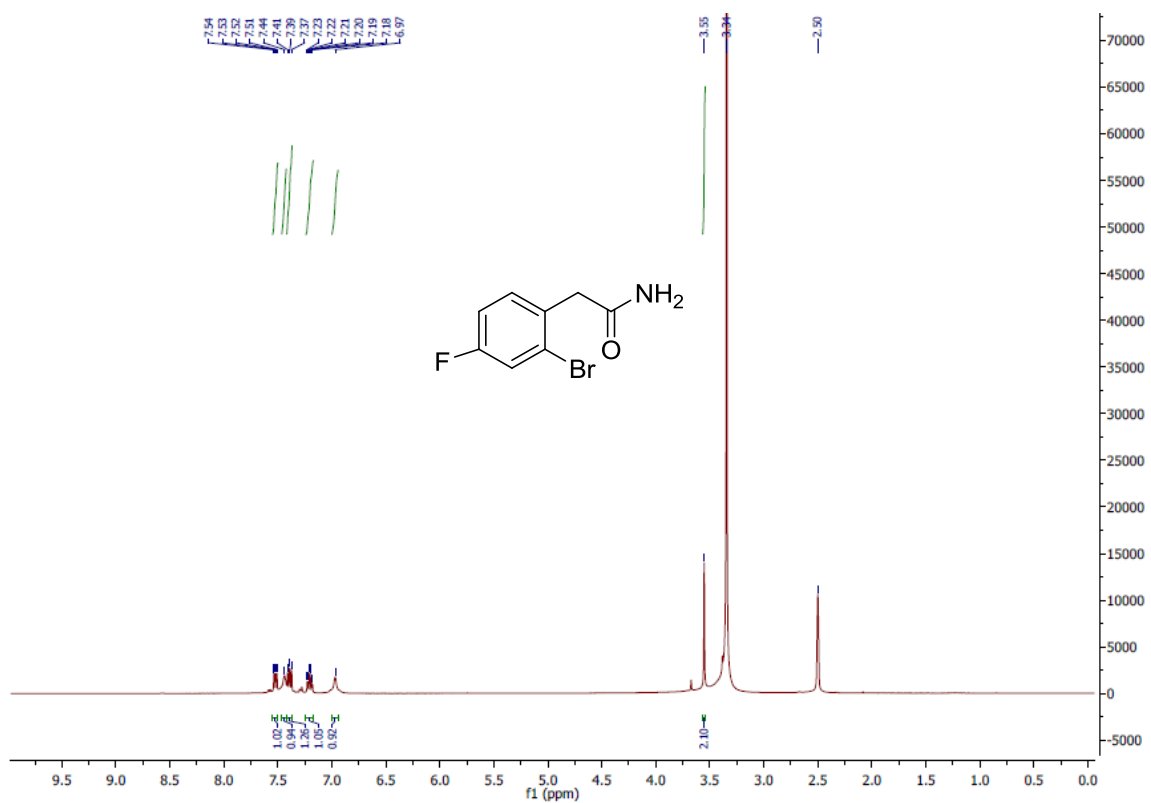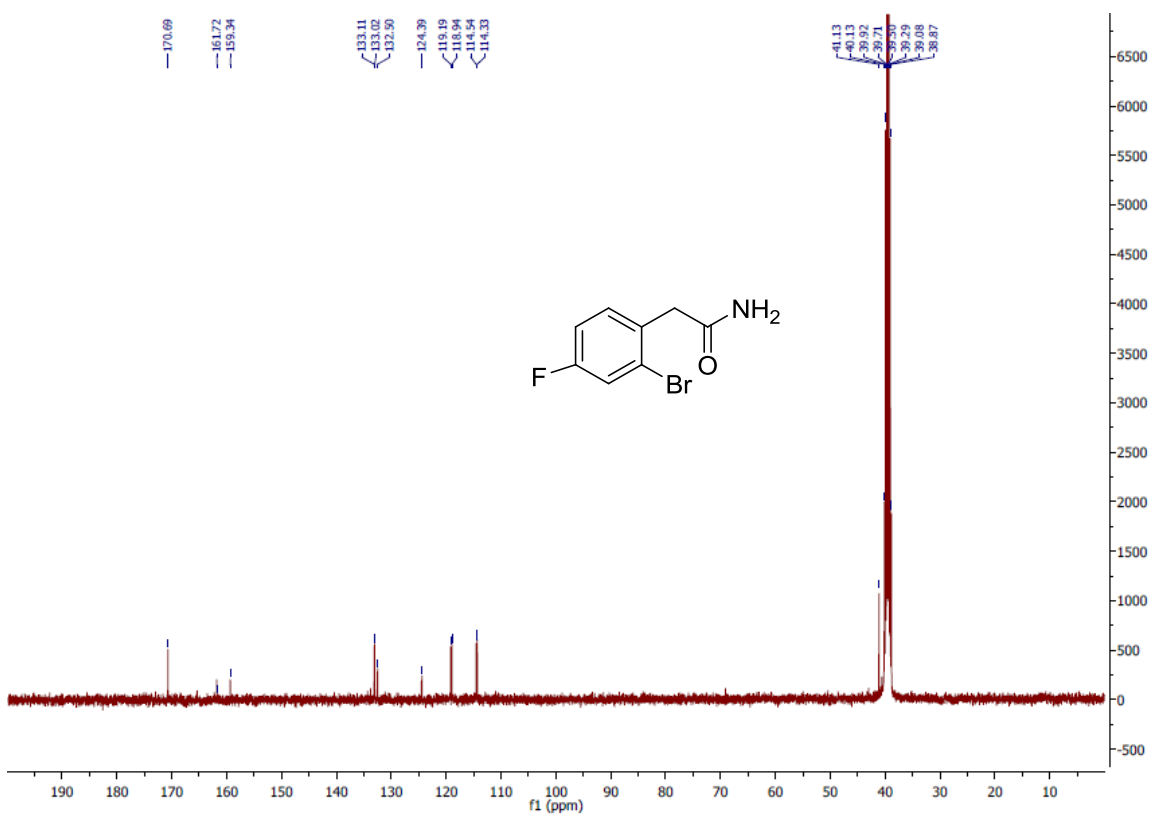

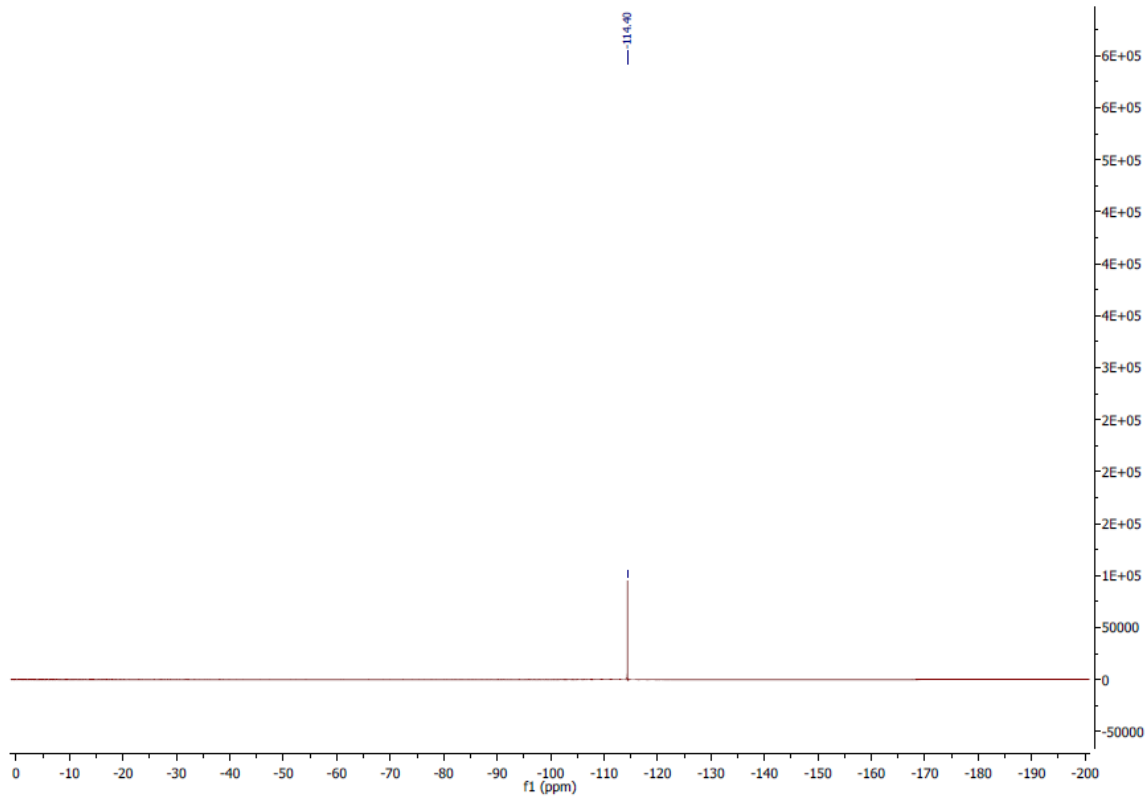

$^1\text{H}$  and  $^{13}\text{C}\{\text{H}\}$  spectra of **2j**

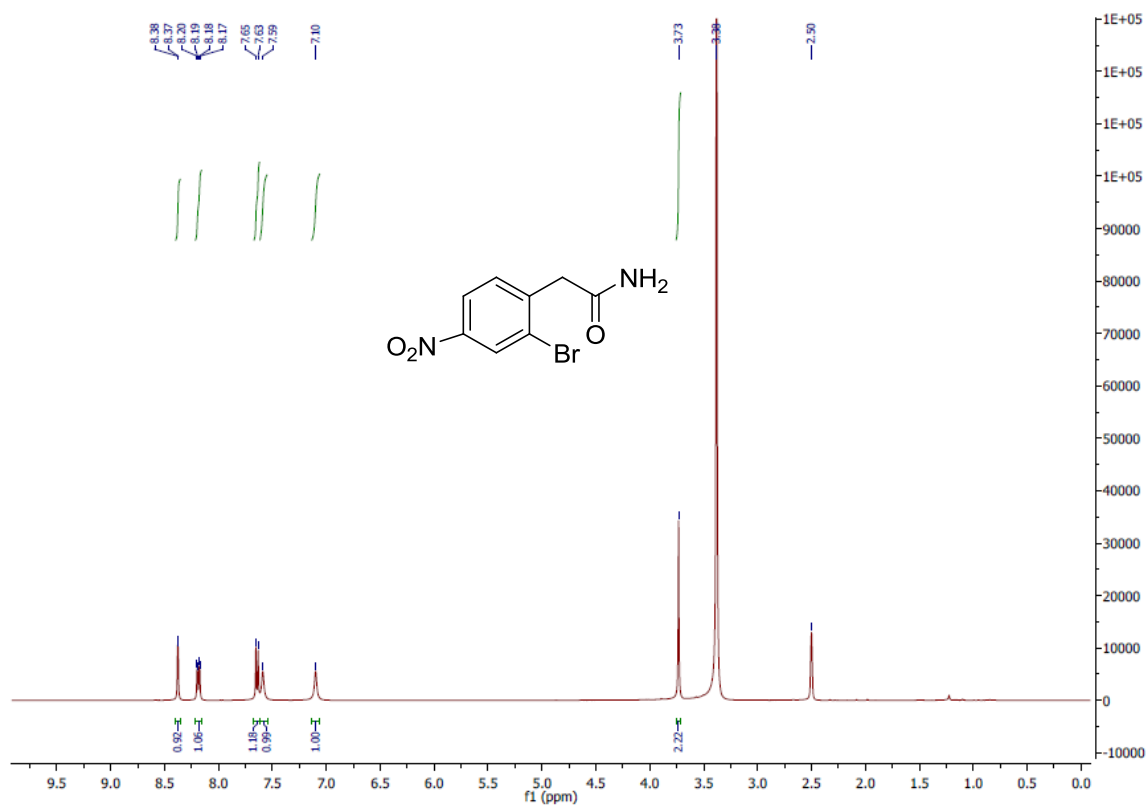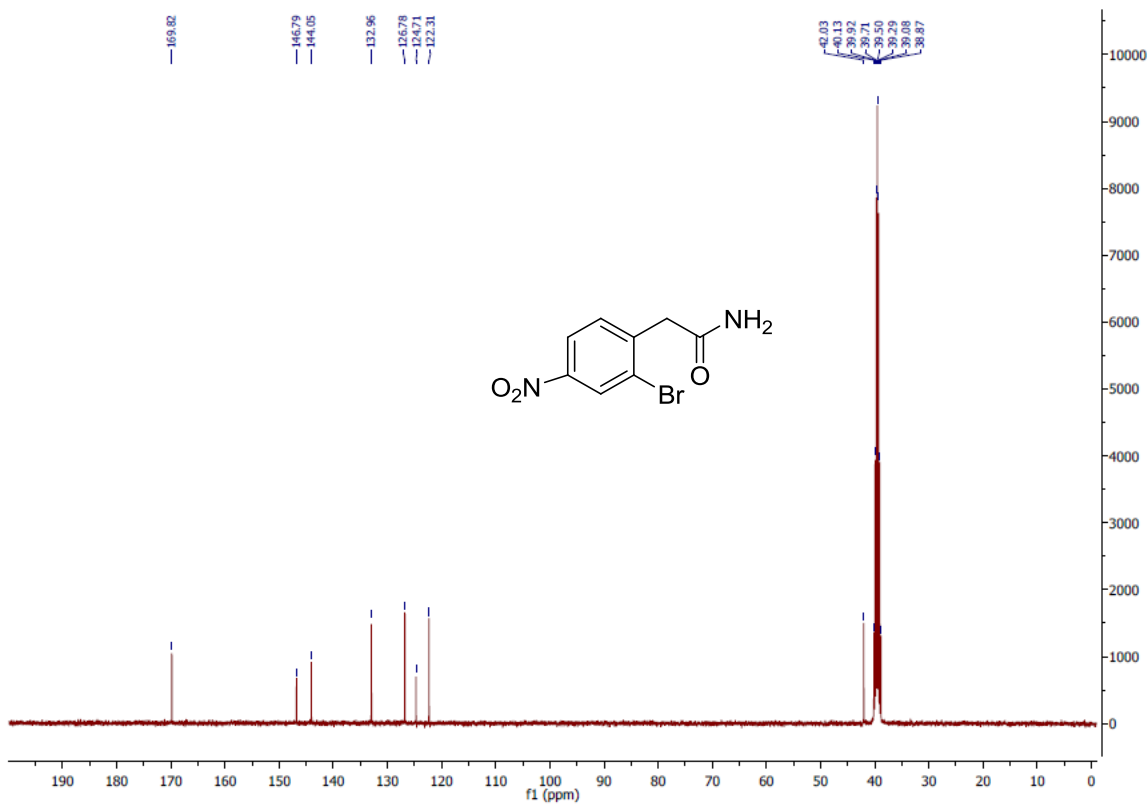

$^1\text{H}$ ,  $^{13}\text{C}\{\text{H}\}$  and  $^{19}\text{F}$  spectra of **2k**

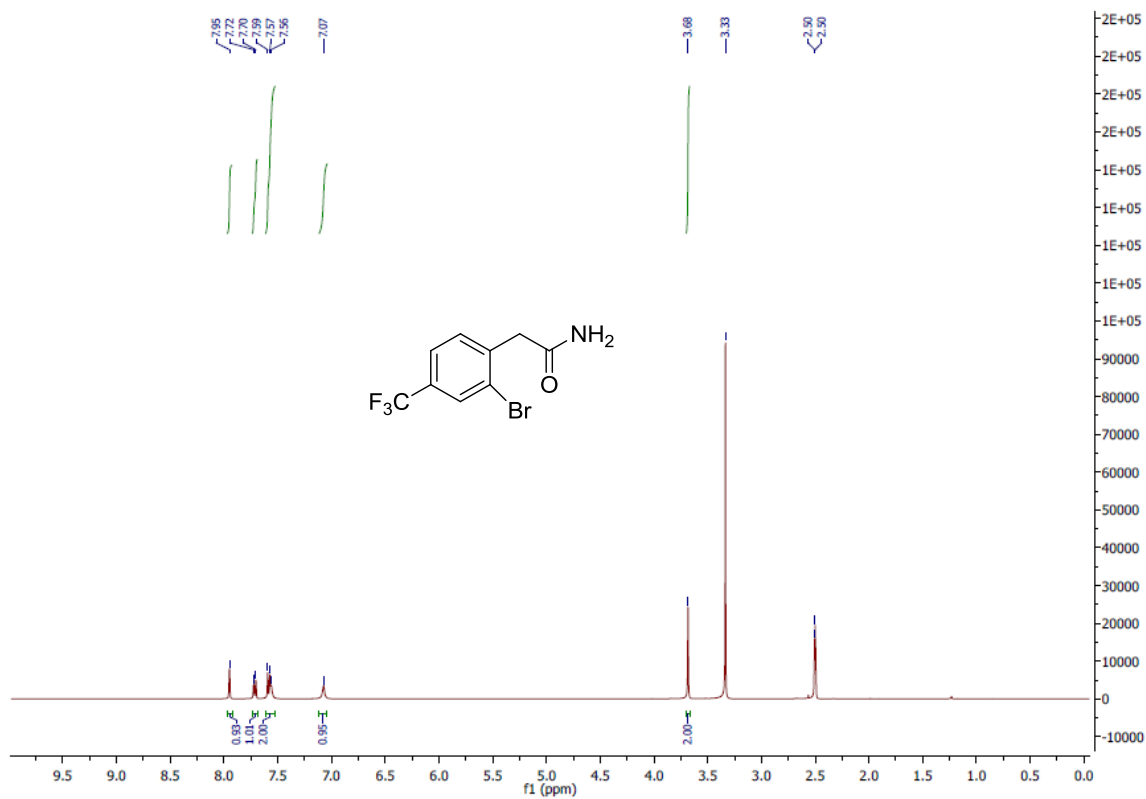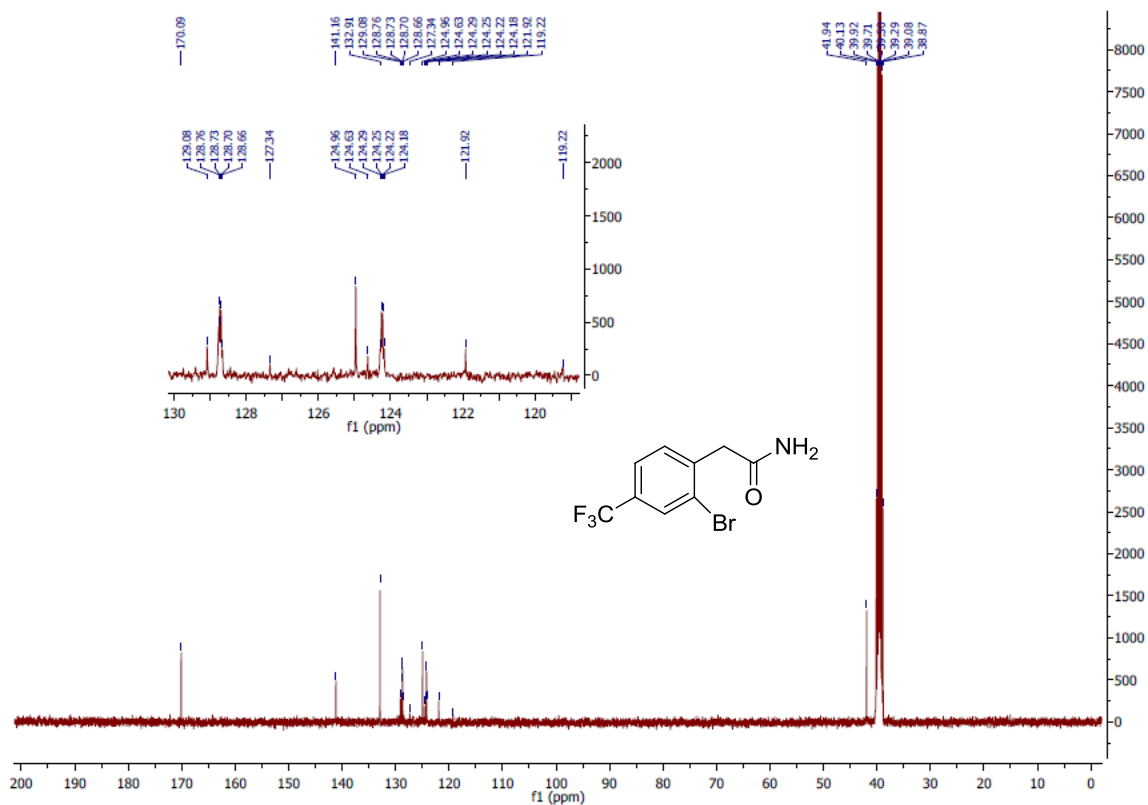



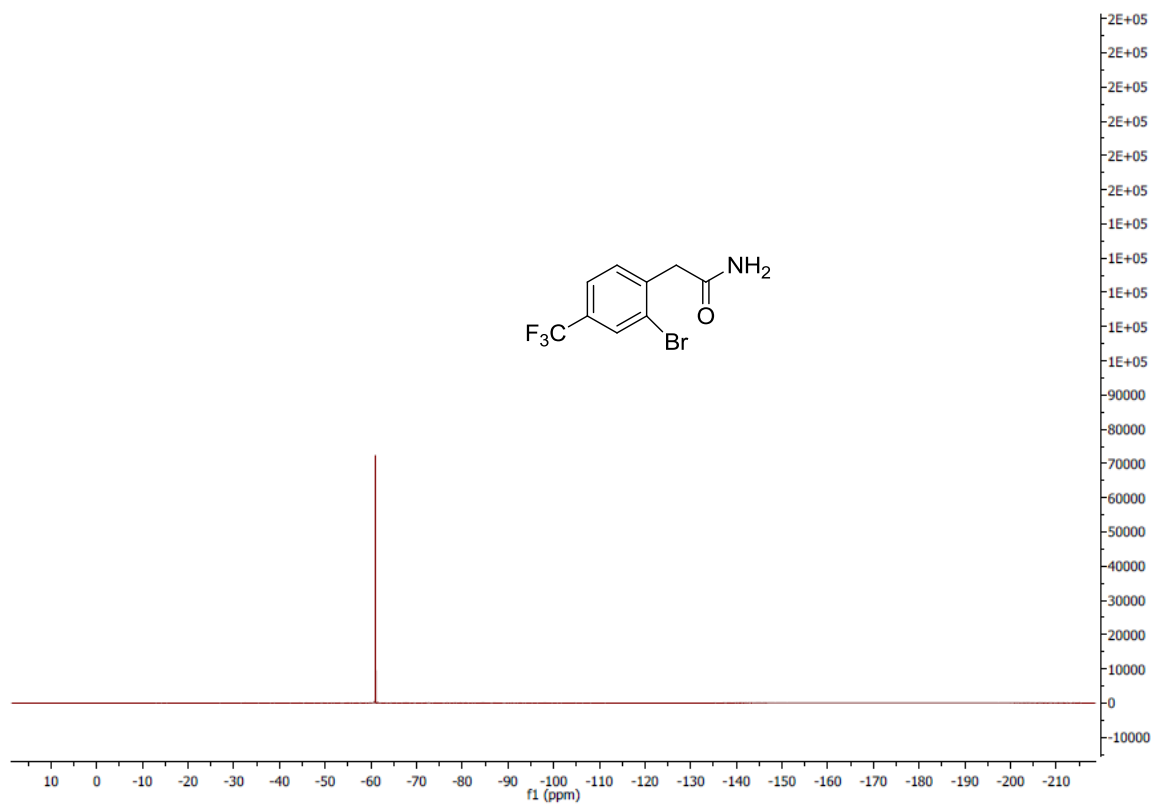

$^1\text{H}$  and  $^{13}\text{C}\{\text{H}\}$  spectra of **3a**

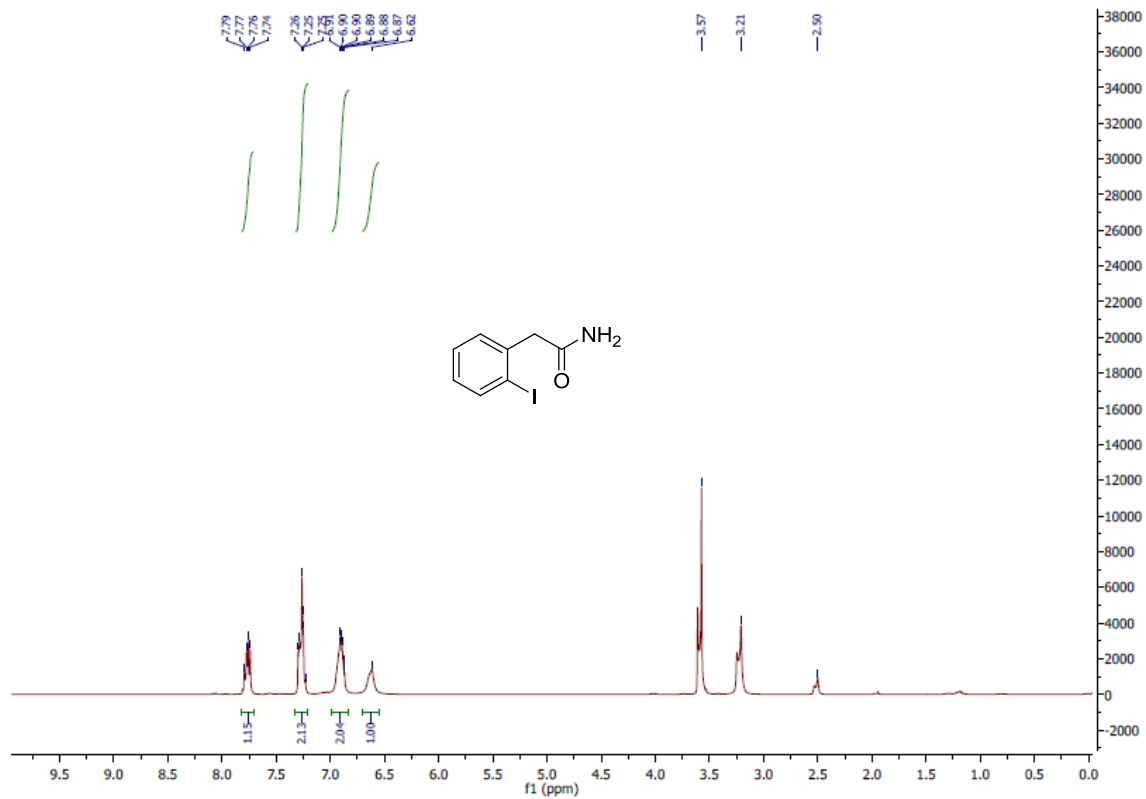

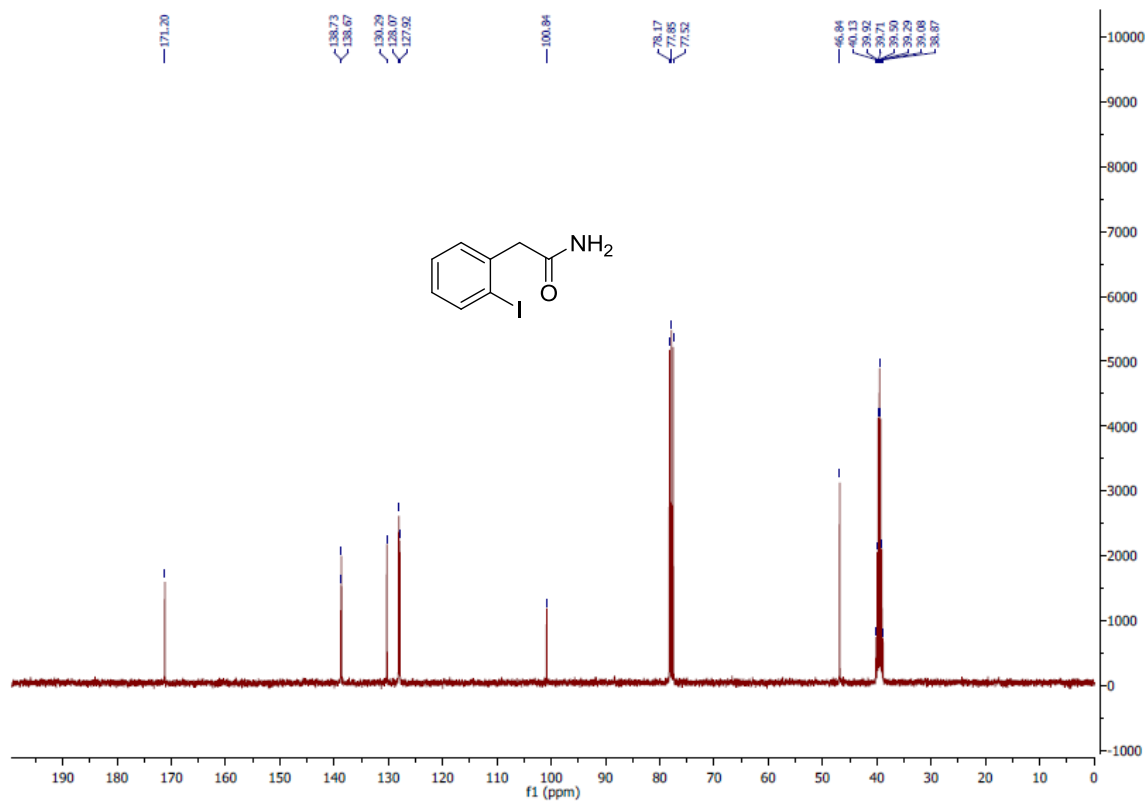

$^1\text{H}$  and  $^{13}\text{C}\{\text{H}\}$  spectra of **3aa**

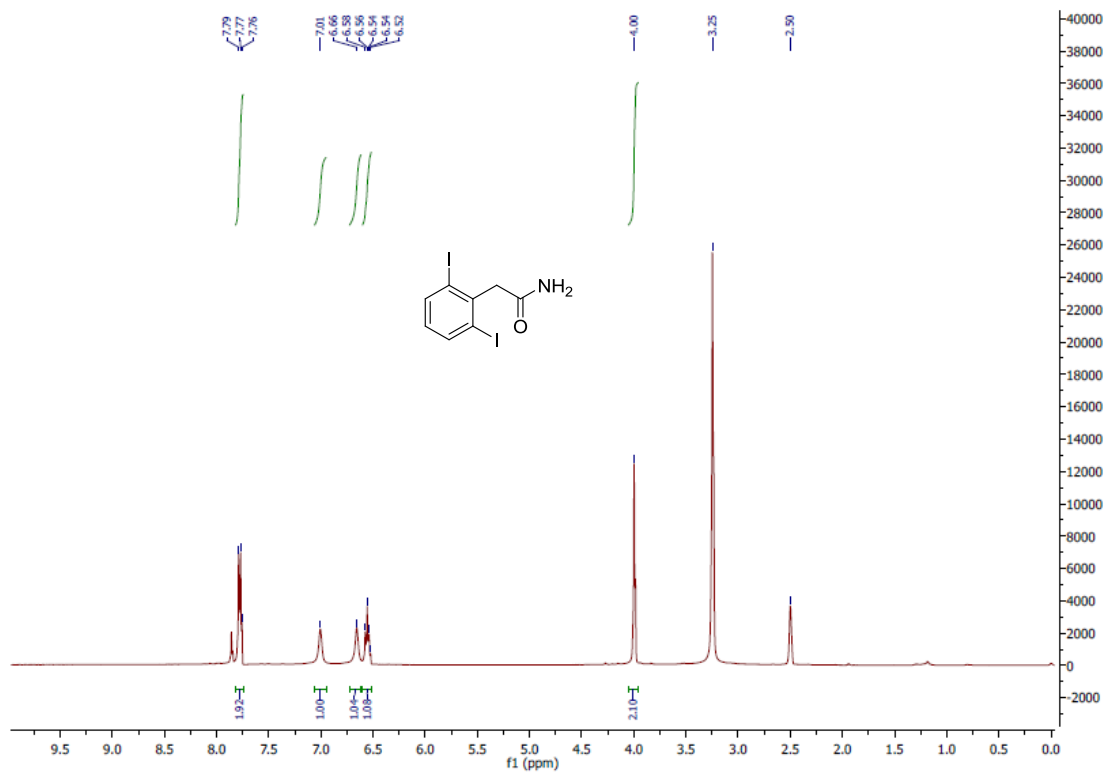

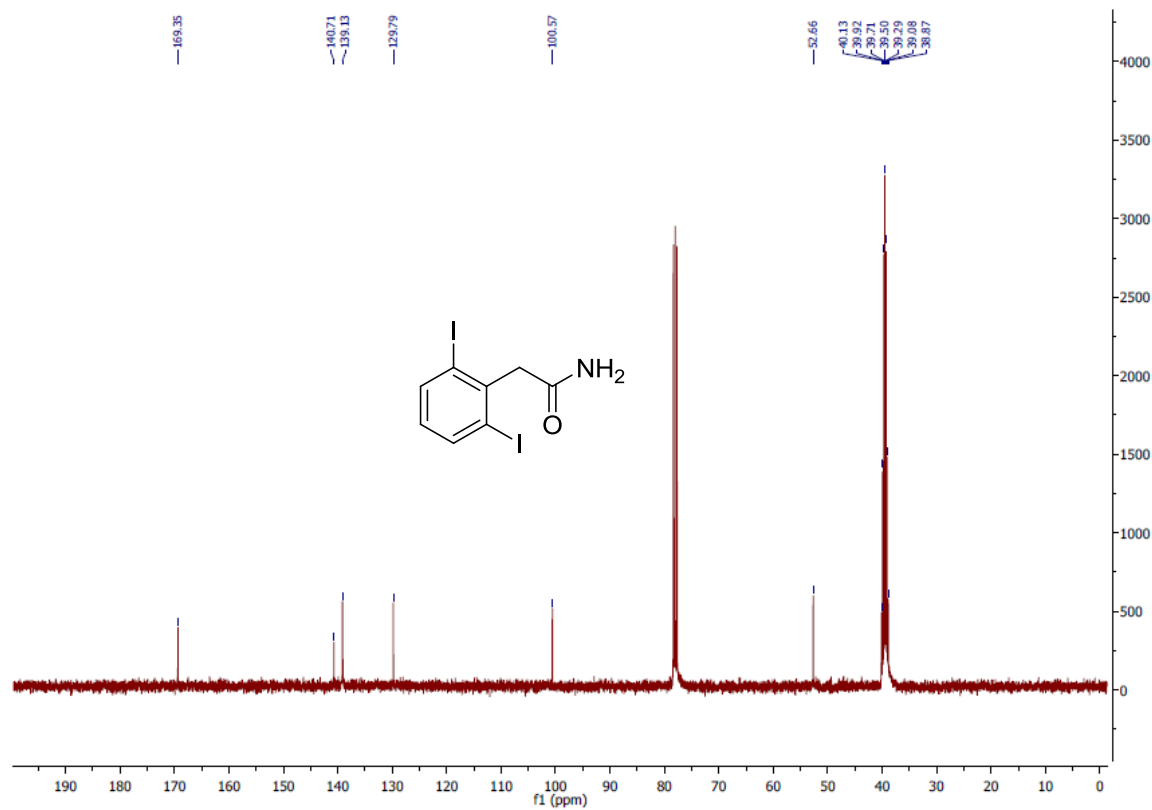

$^1\text{H}$  and  $^{13}\text{C}\{\text{H}\}$  spectra of **3b**

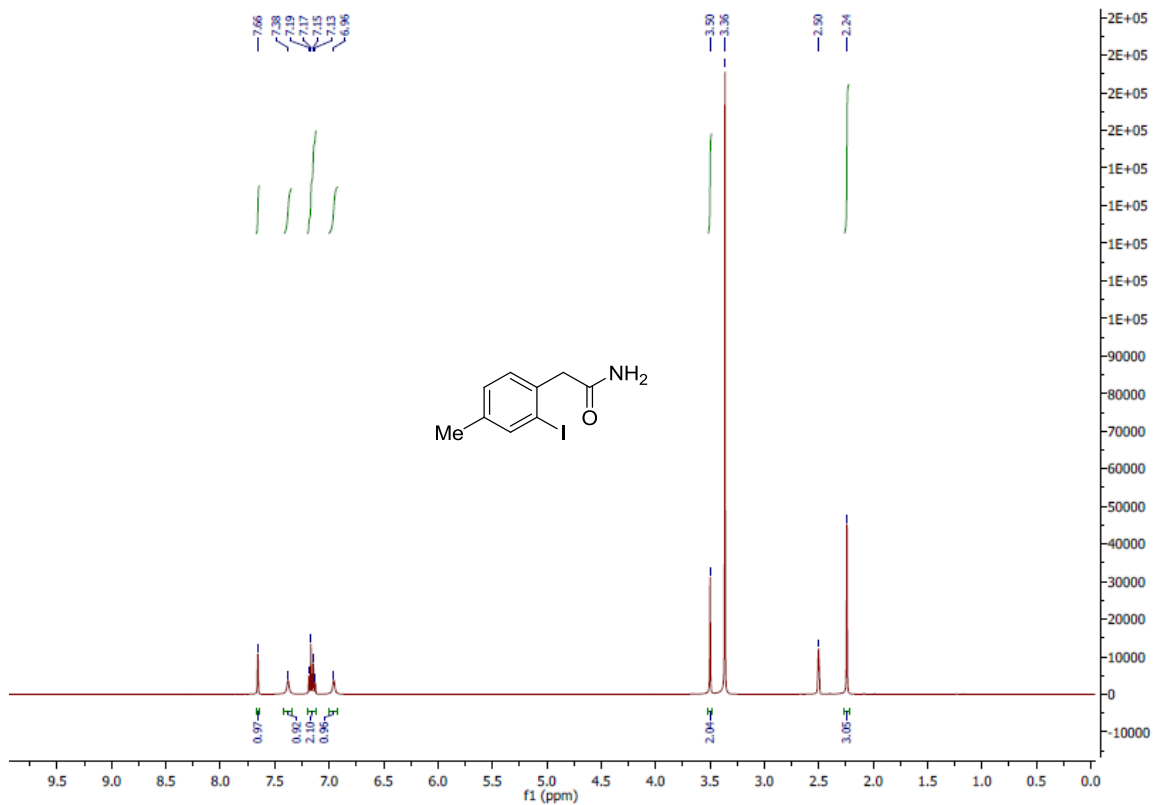

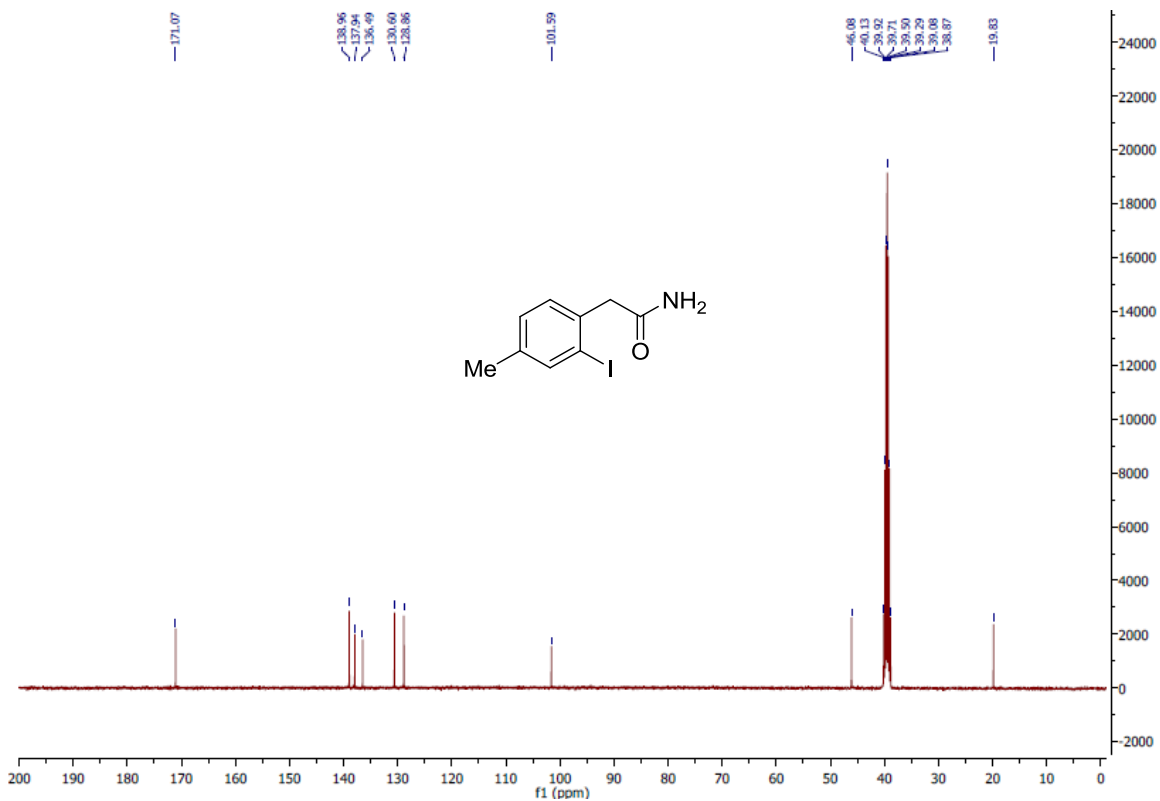

$^1\text{H}$  and  $^{13}\text{C}\{\text{H}\}$  spectra of **3bb**

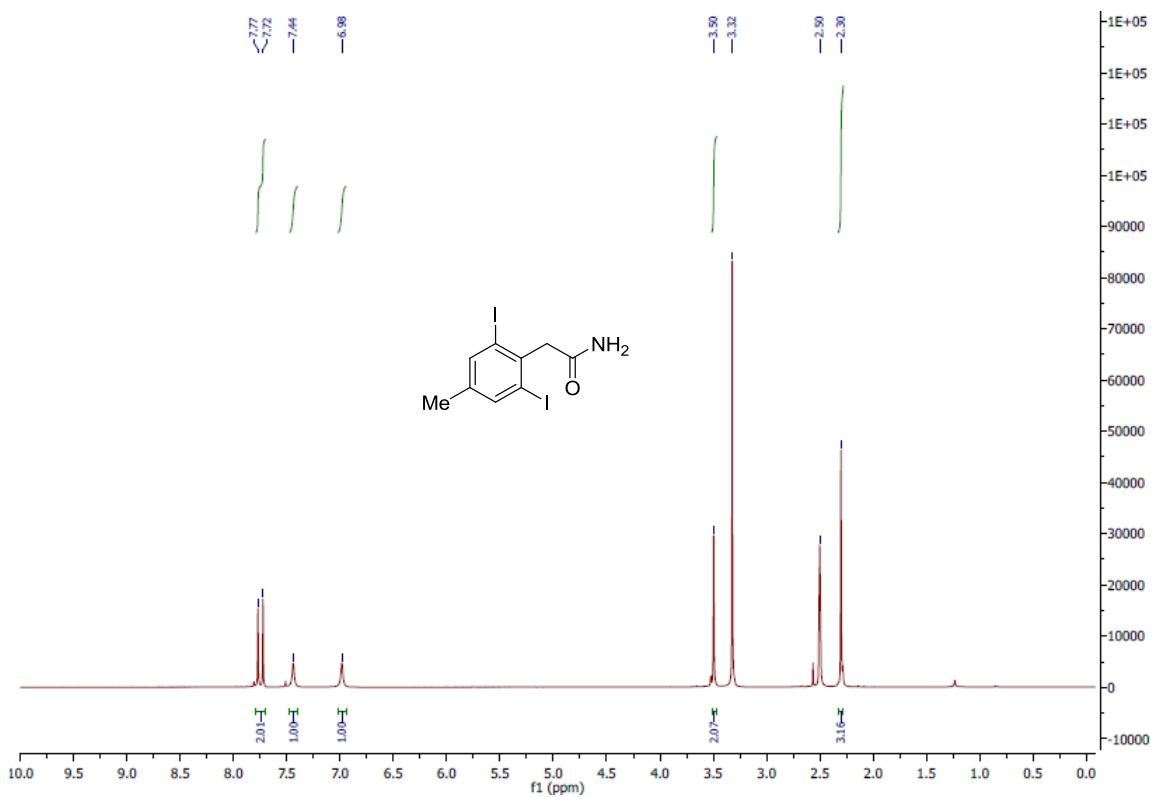

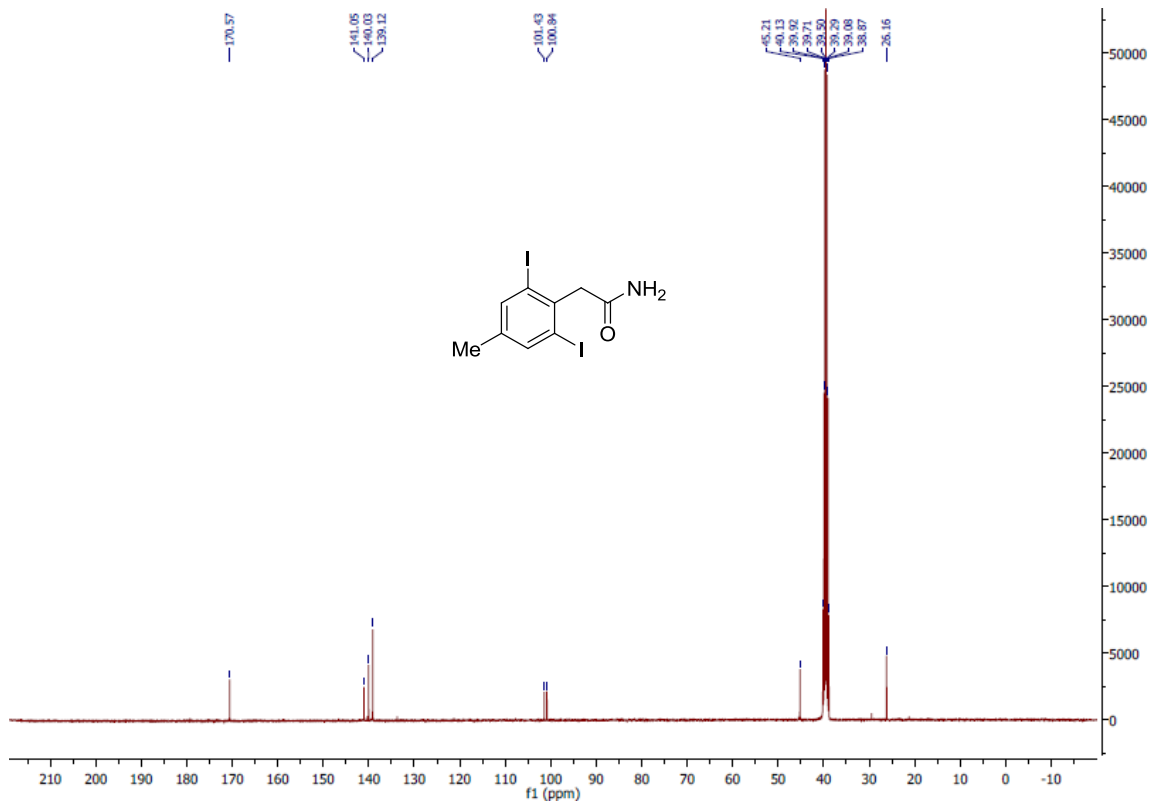

<sup>1</sup>H and <sup>13</sup>C{H} spectra of **3c**

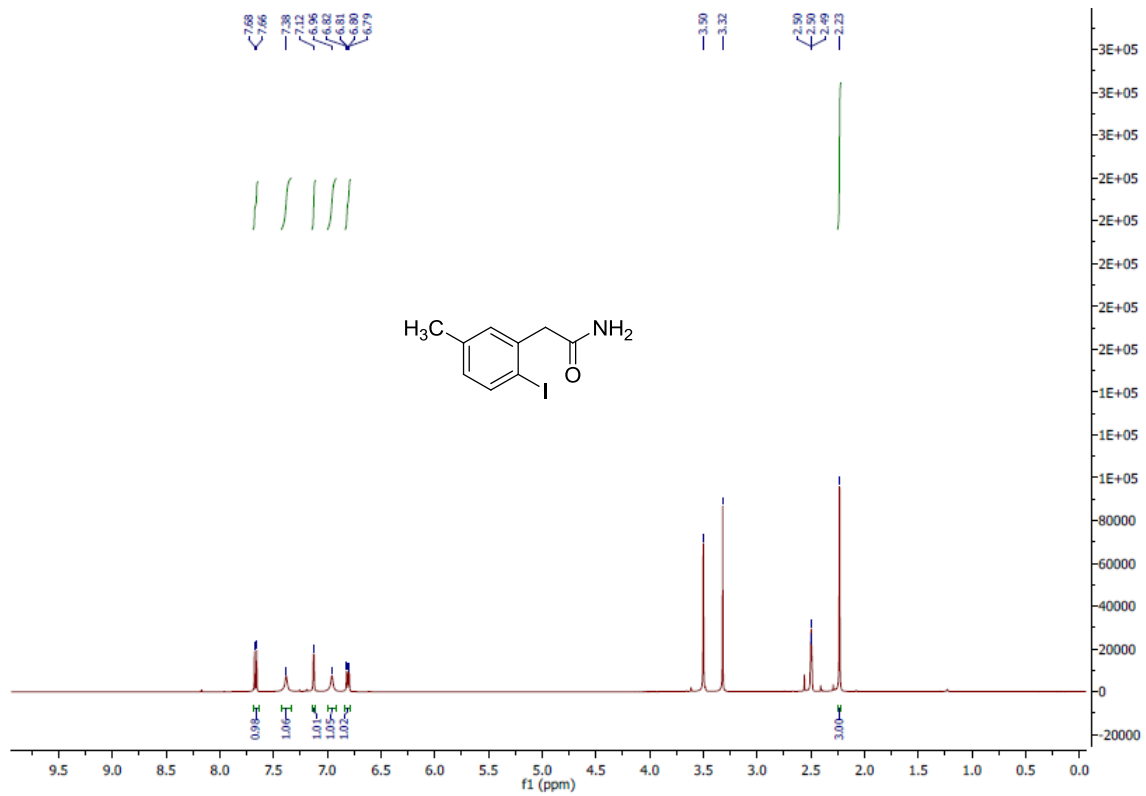

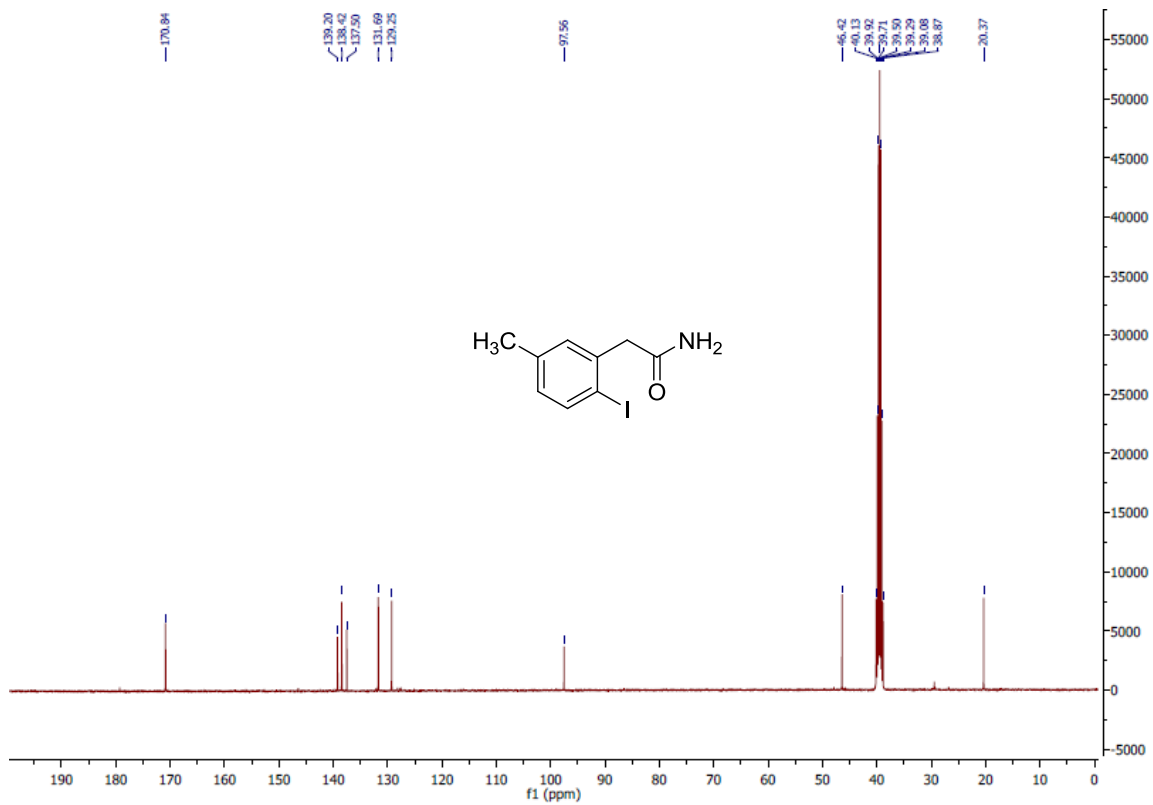

<sup>1</sup>H and <sup>13</sup>C{H} spectra of **3d**

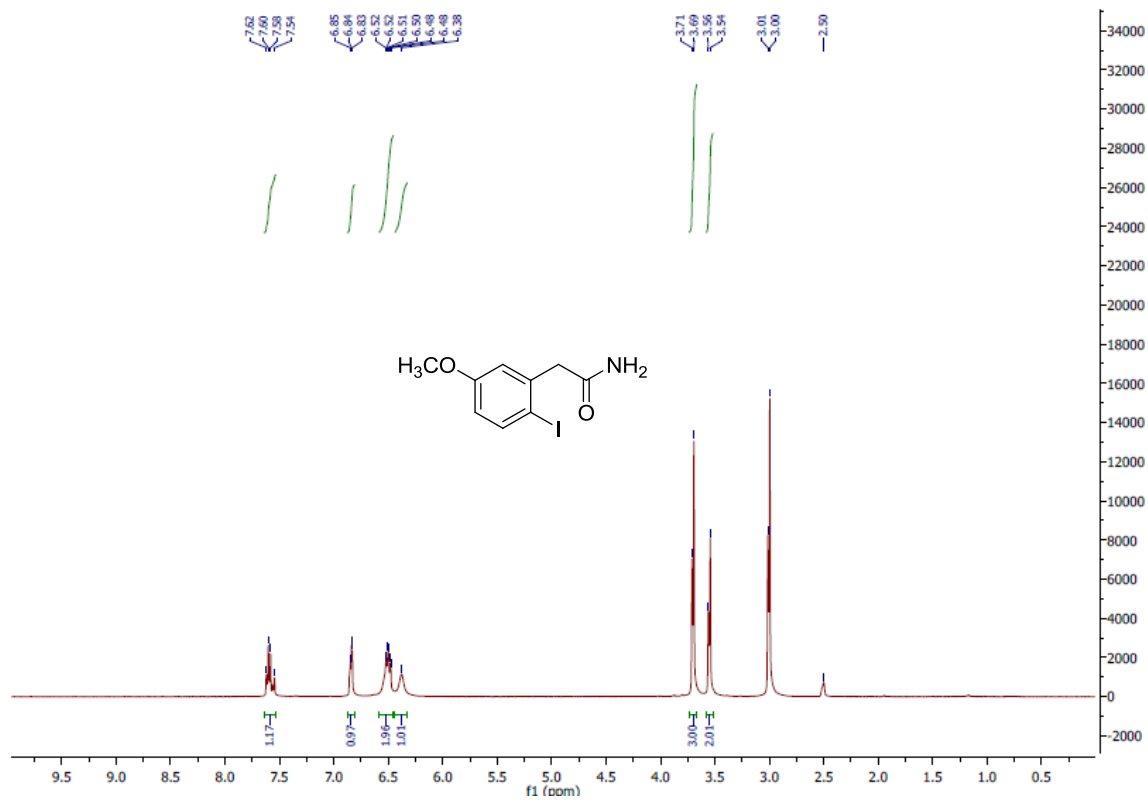

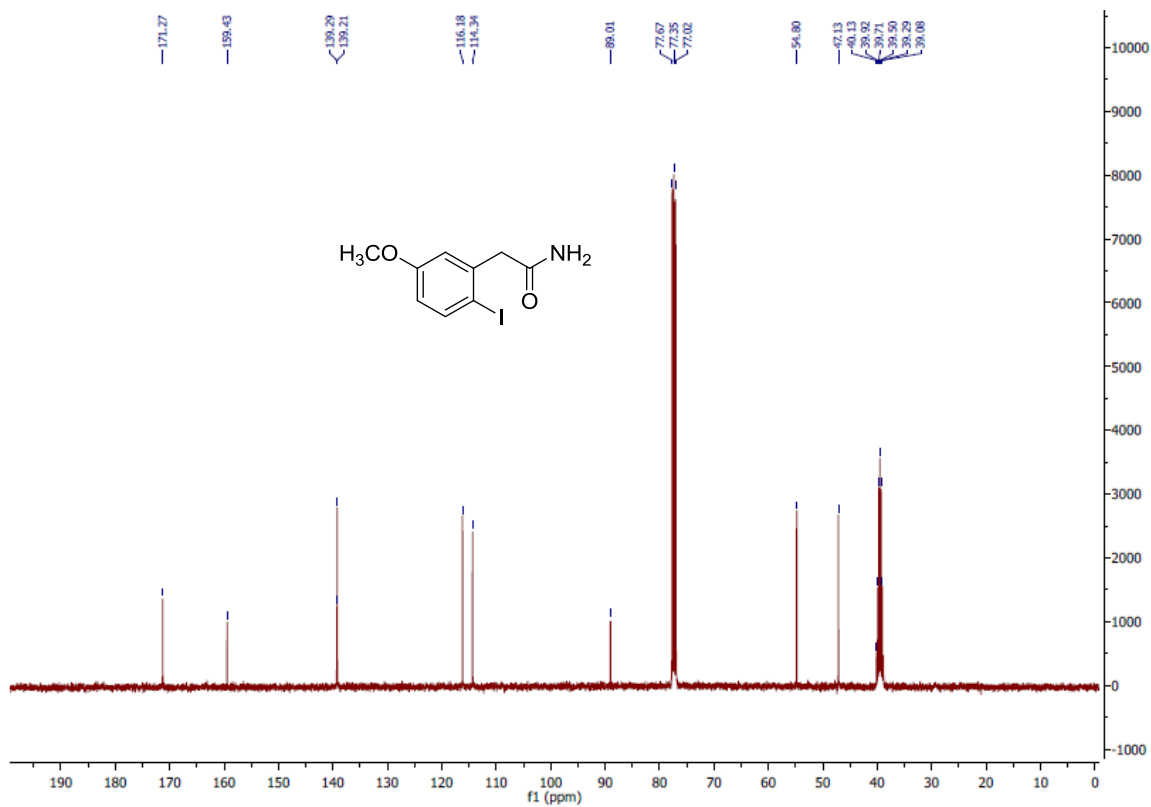

$^1\text{H}$  and  $^{13}\text{C}\{\text{H}\}$  spectra of **3e**

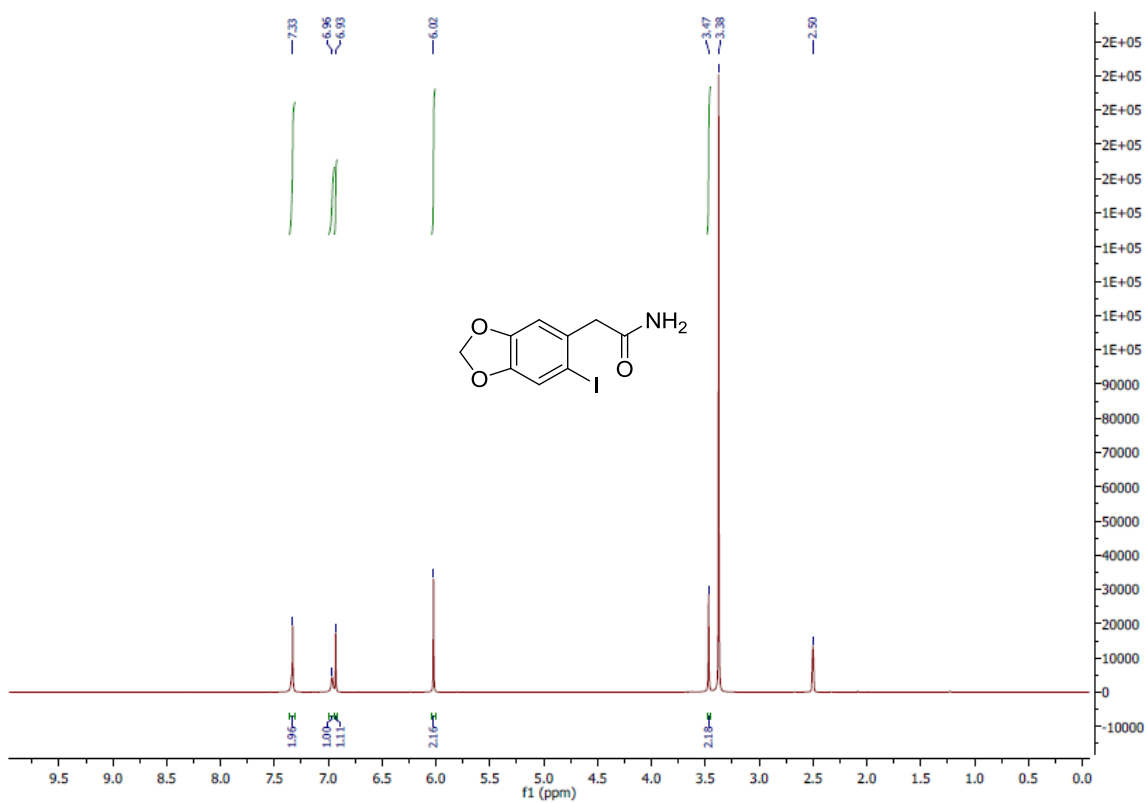

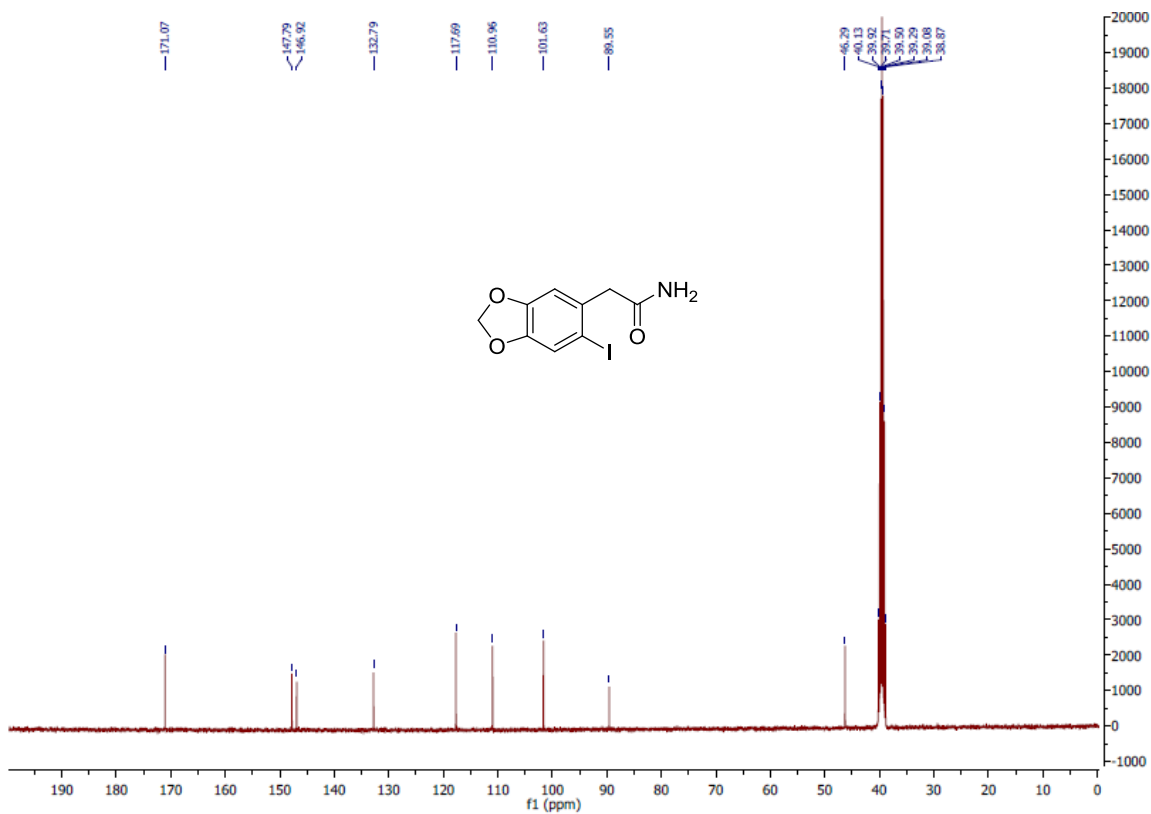

$^1\text{H}$  and  $^{13}\text{C}\{\text{H}\}$  spectra of **3f**

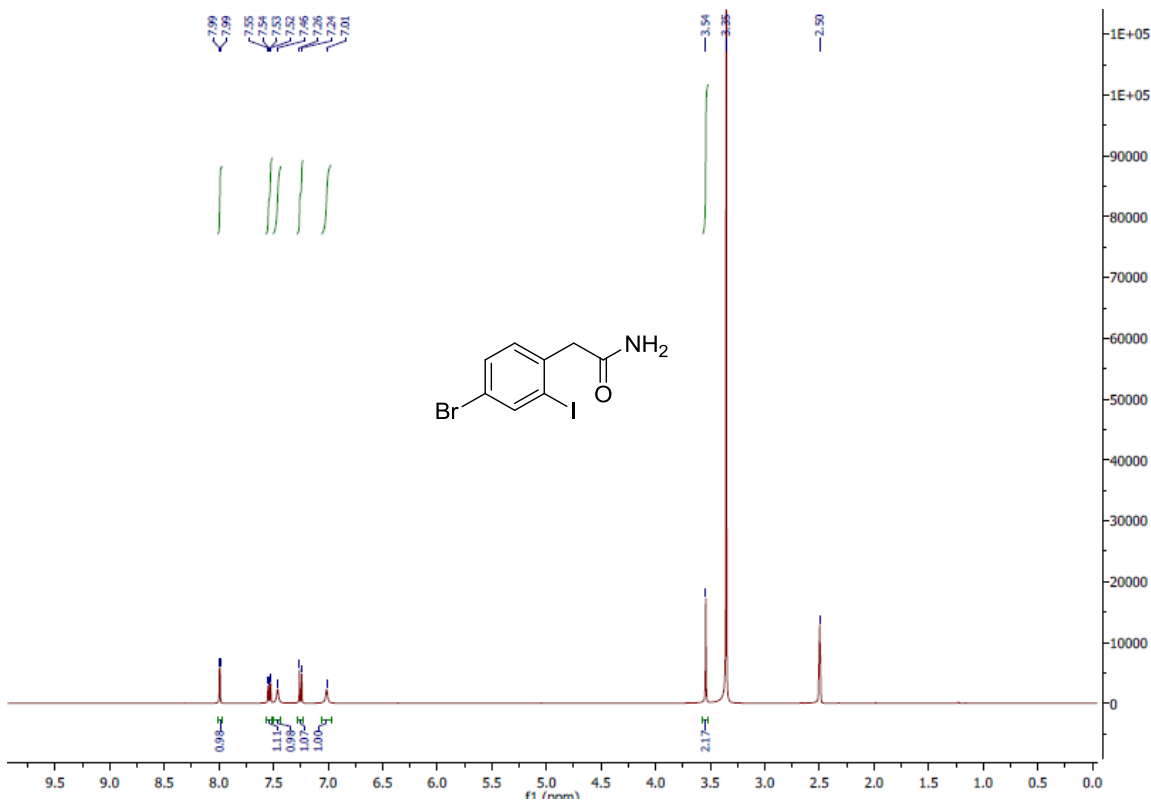



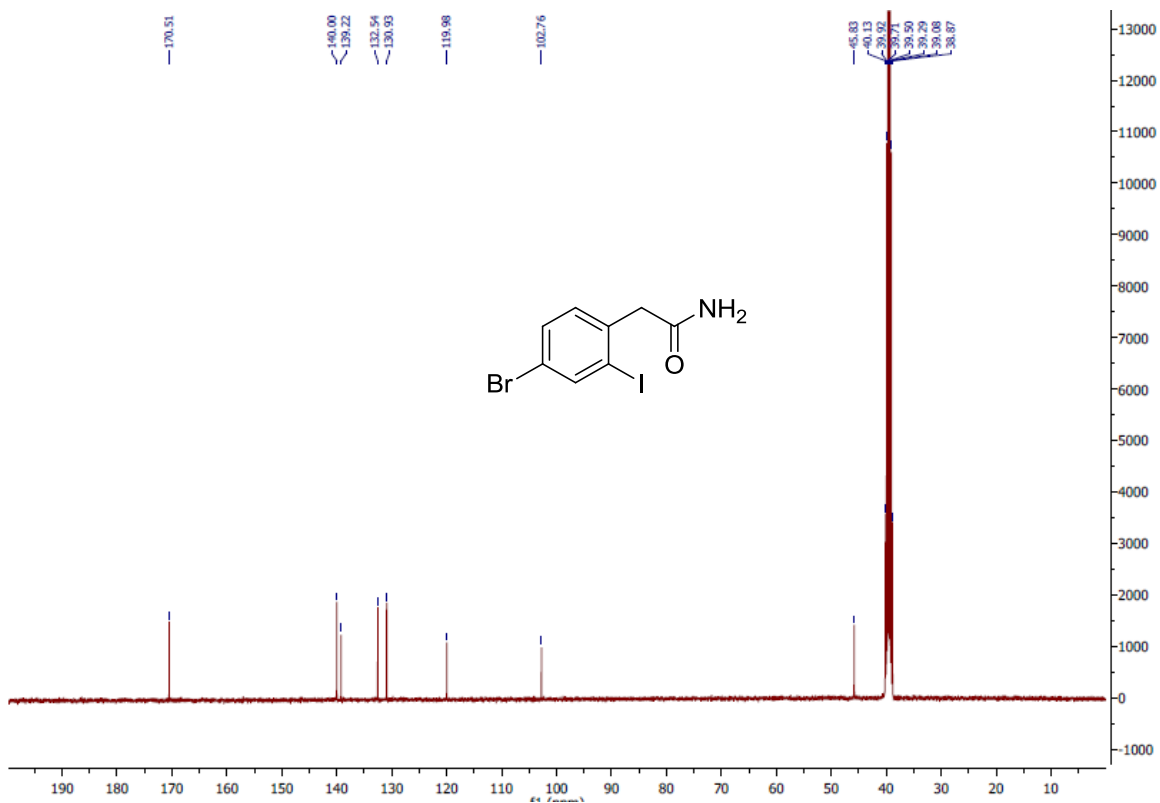

<sup>1</sup>H and <sup>13</sup>C{H} spectra of **3g**

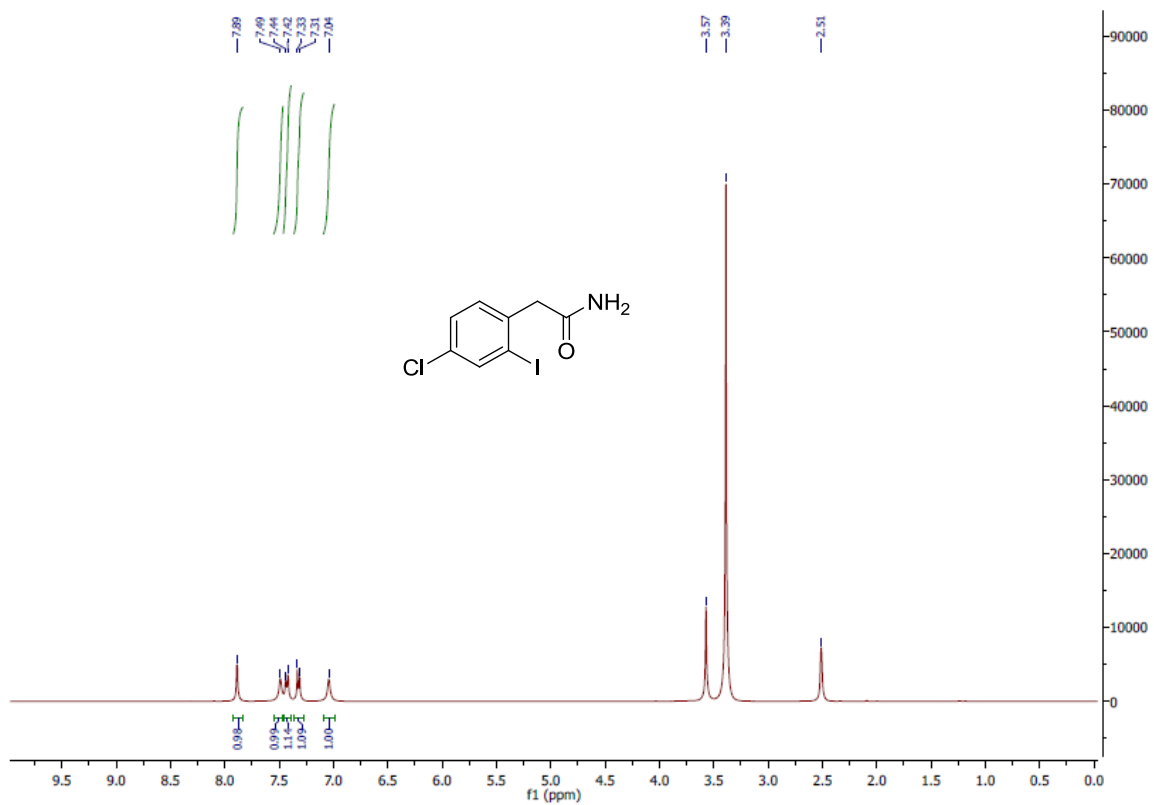

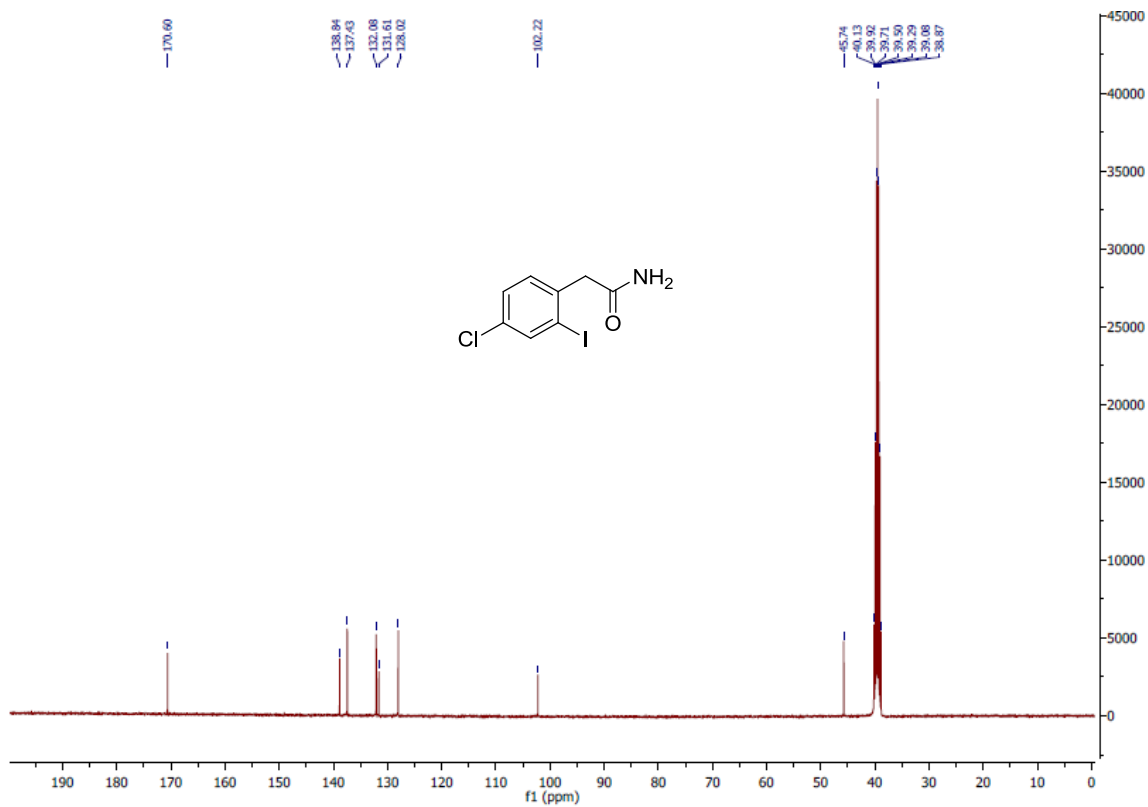

$^1\text{H}$  and  $^{13}\text{C}\{\text{H}\}$  spectra of **3h**

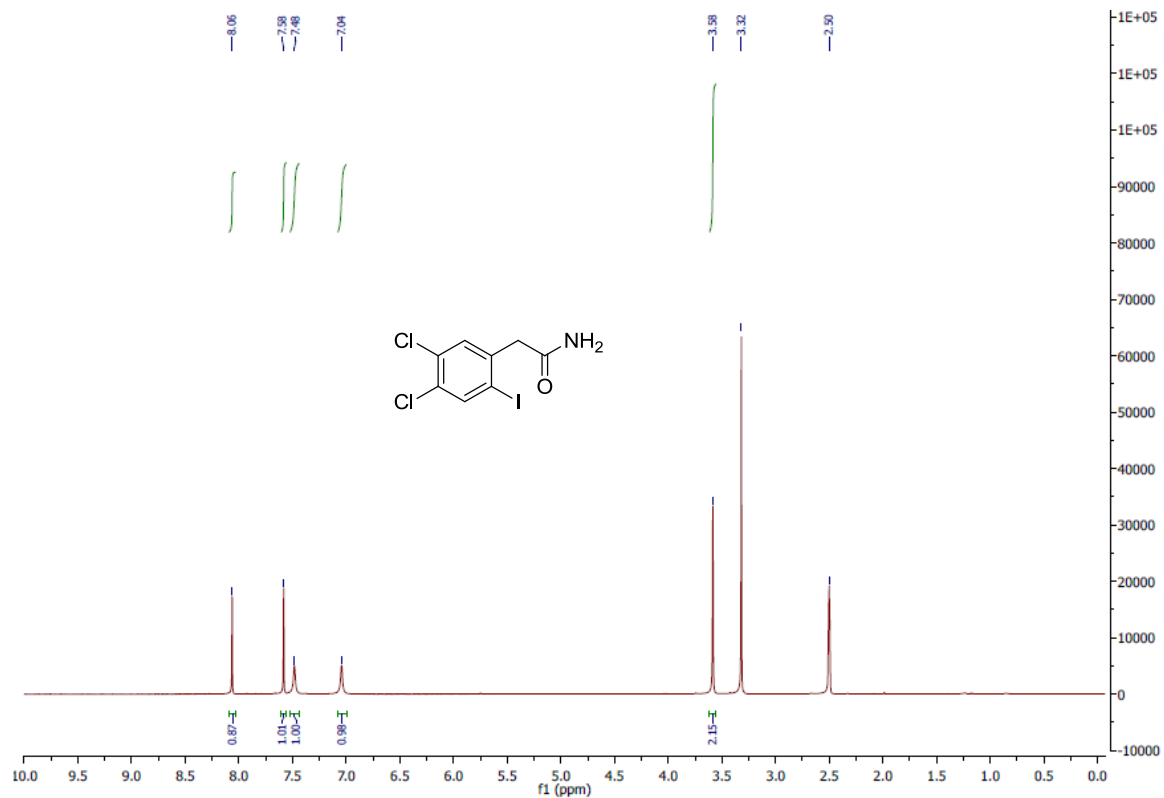

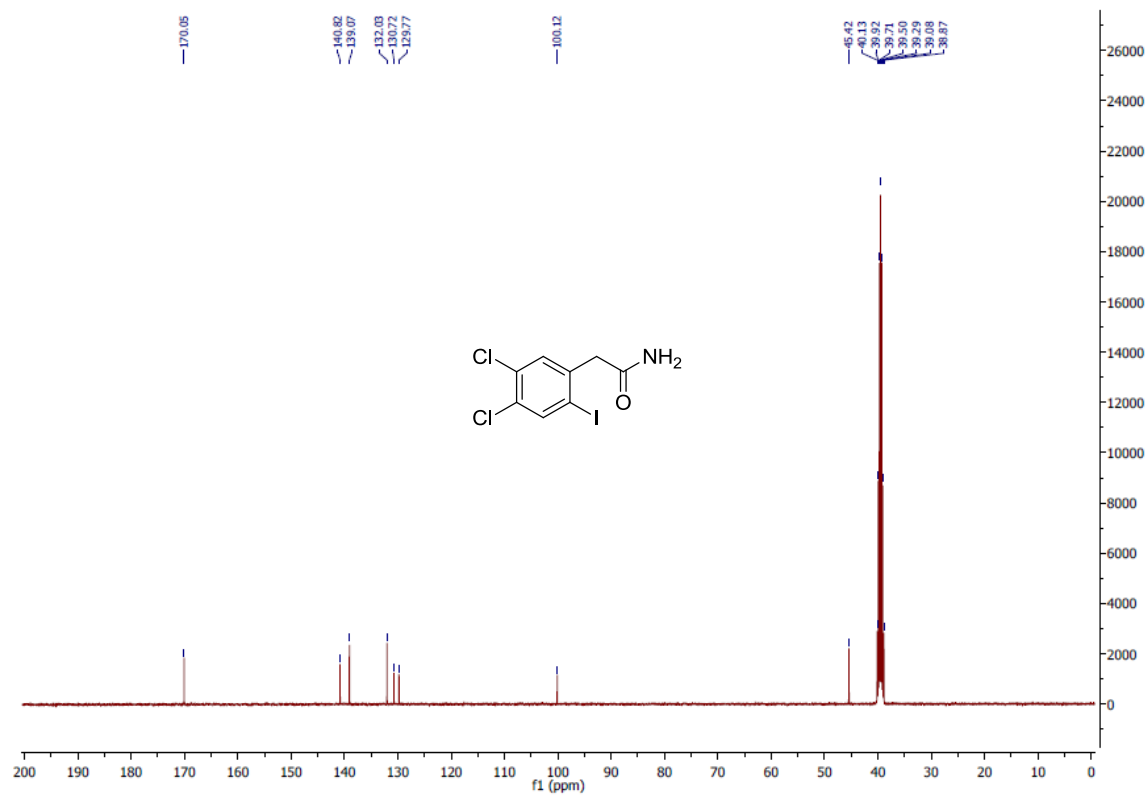

$^1\text{H}$   $^{13}\text{C}\{\text{H}\}$ ,  $^{19}\text{F}$  and spectra of **3i**

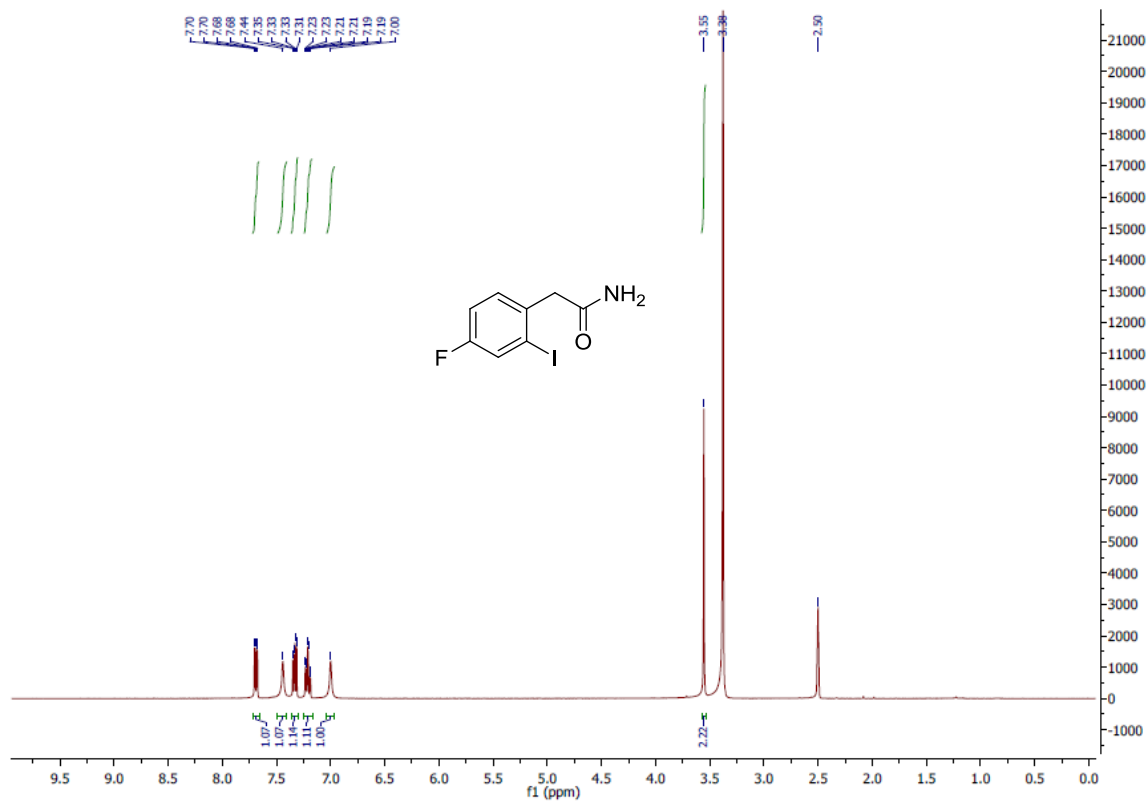

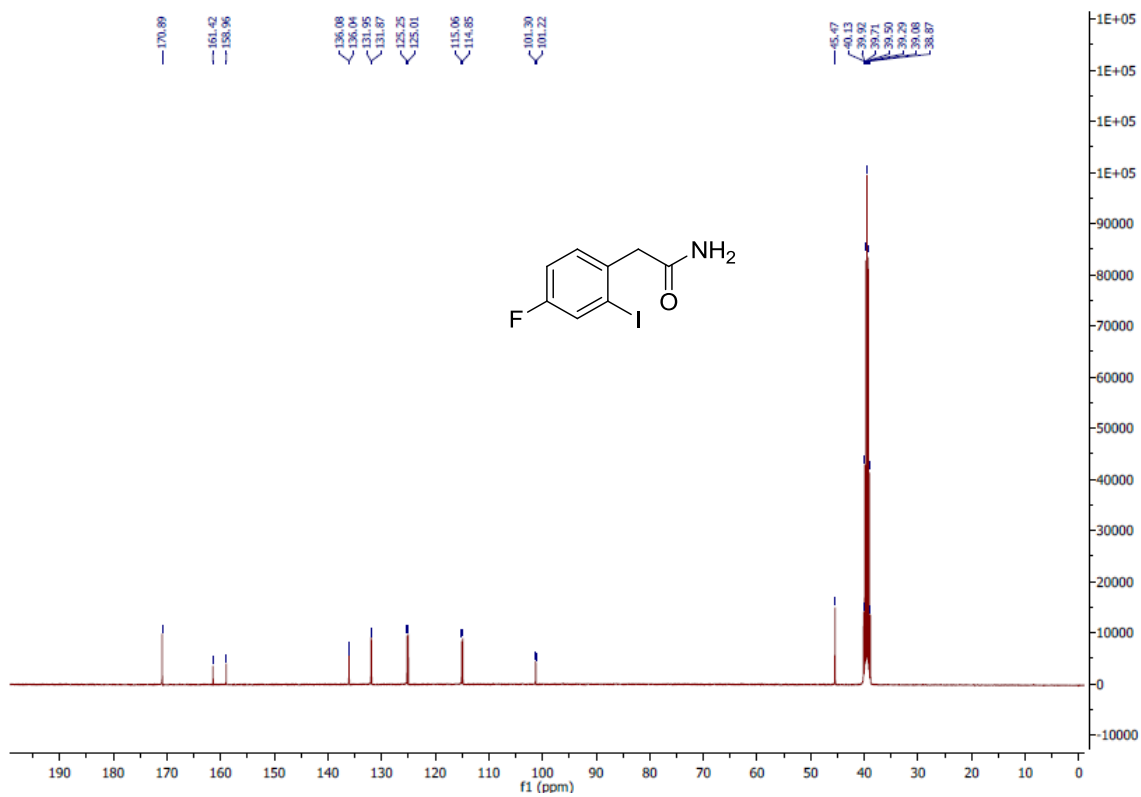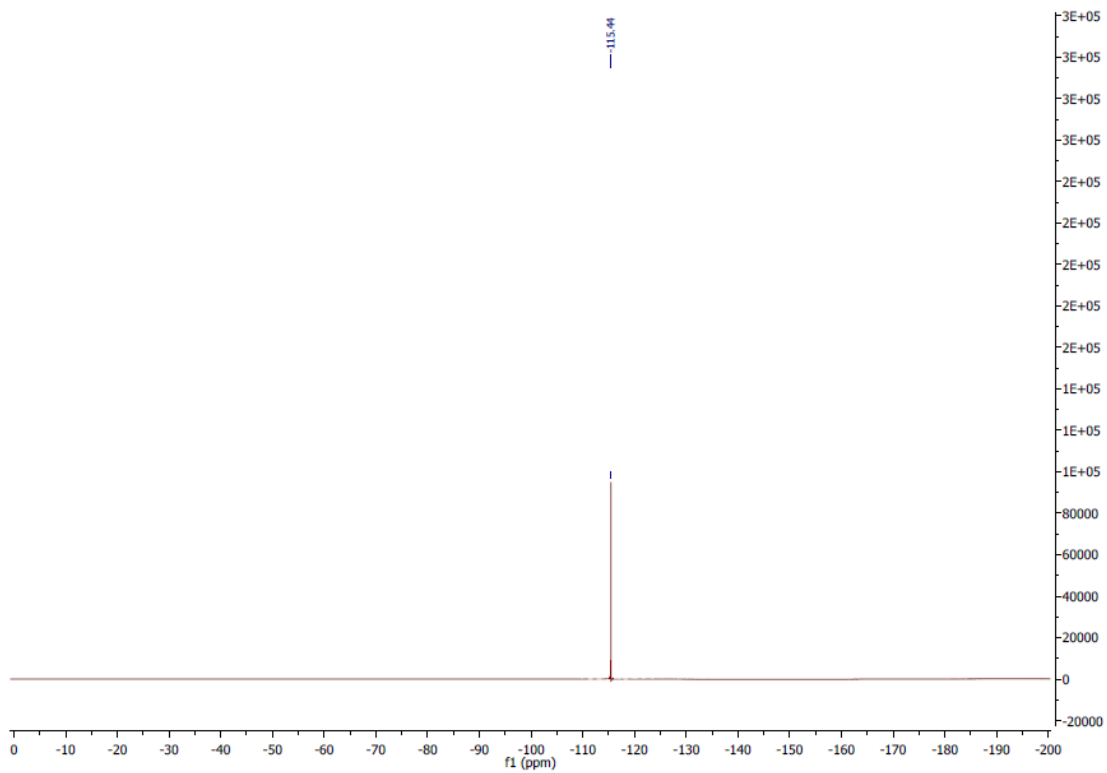

$^1\text{H}$  and  $^{13}\text{C}\{\text{H}\}$  spectra of **3j**

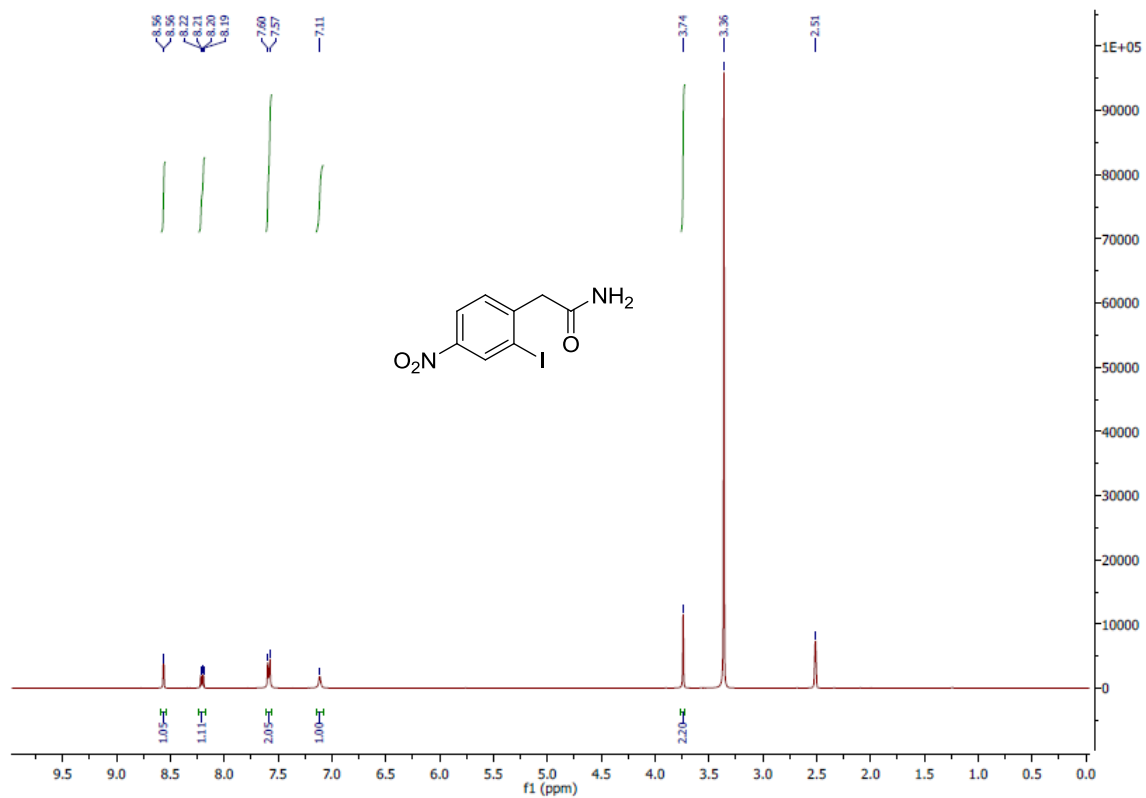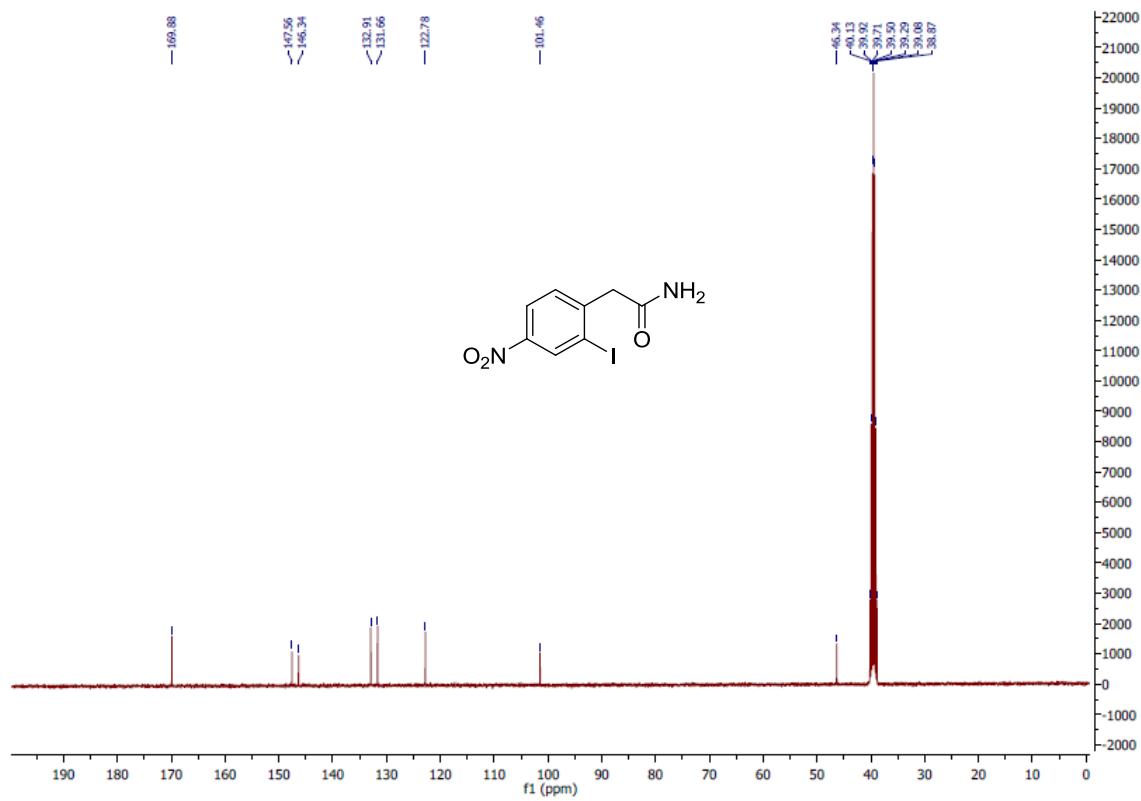

$^1\text{H}$  and  $^{13}\text{C}\{\text{H}\}$  spectra of **3k**

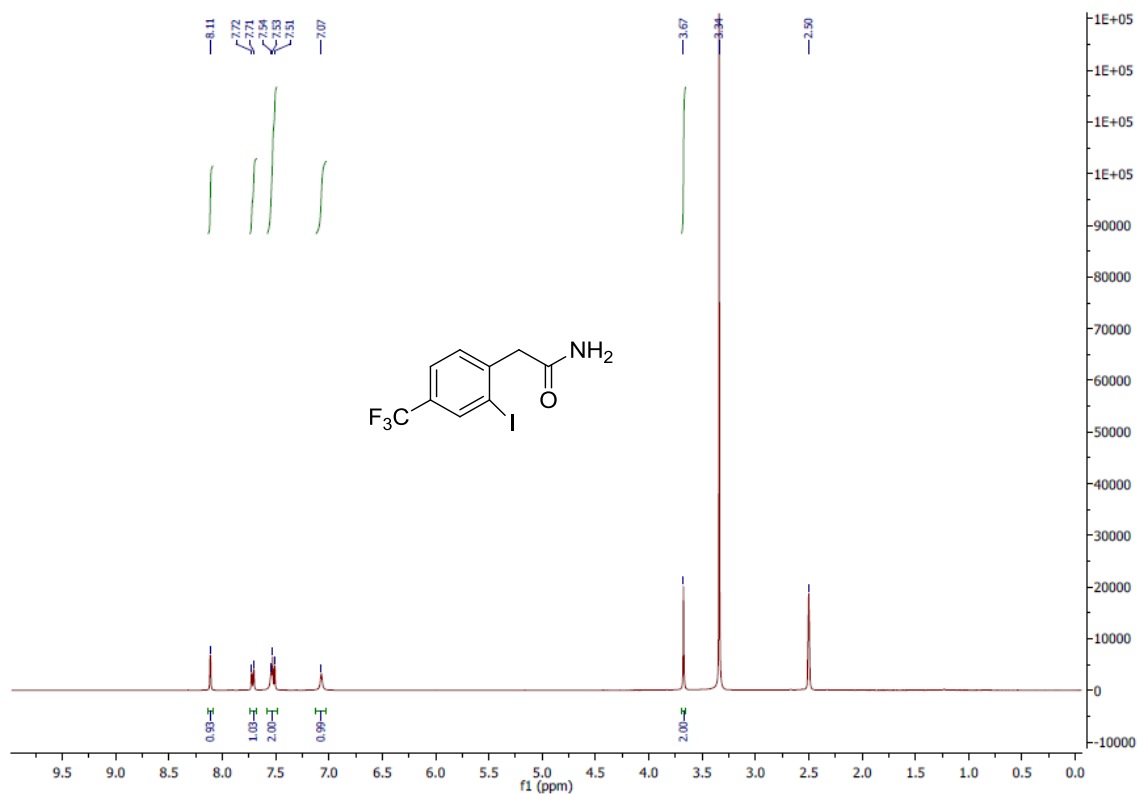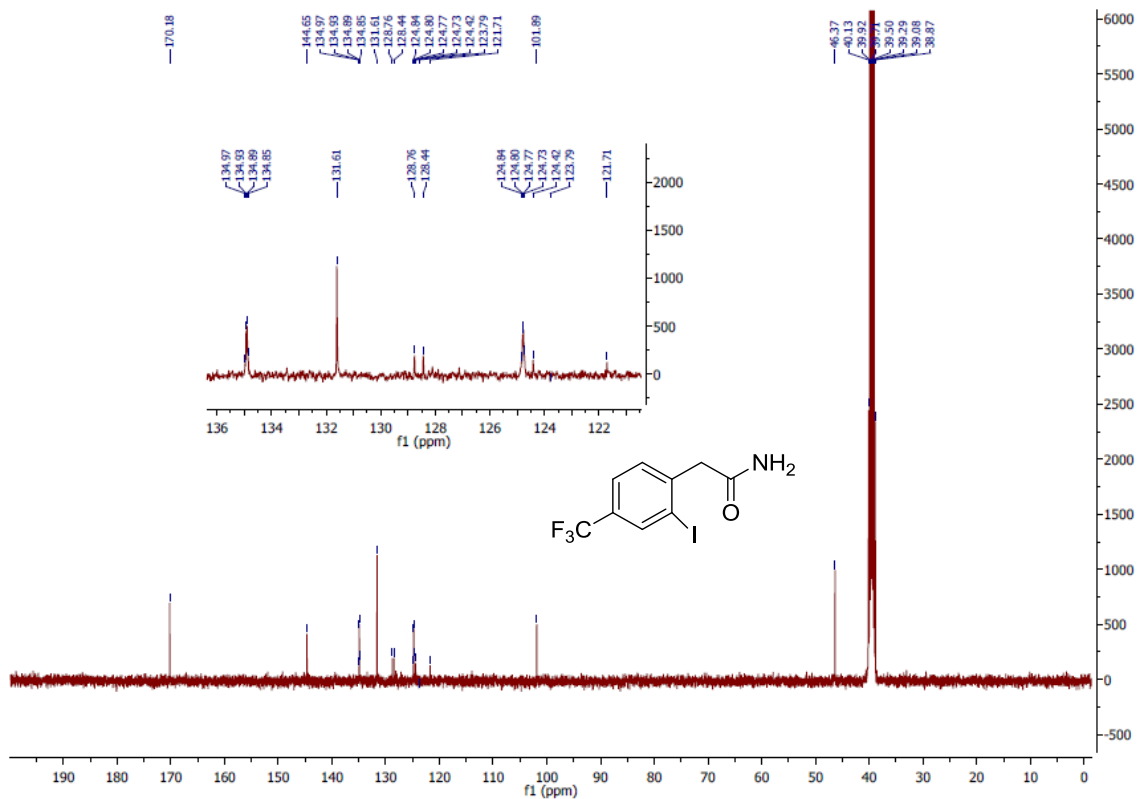

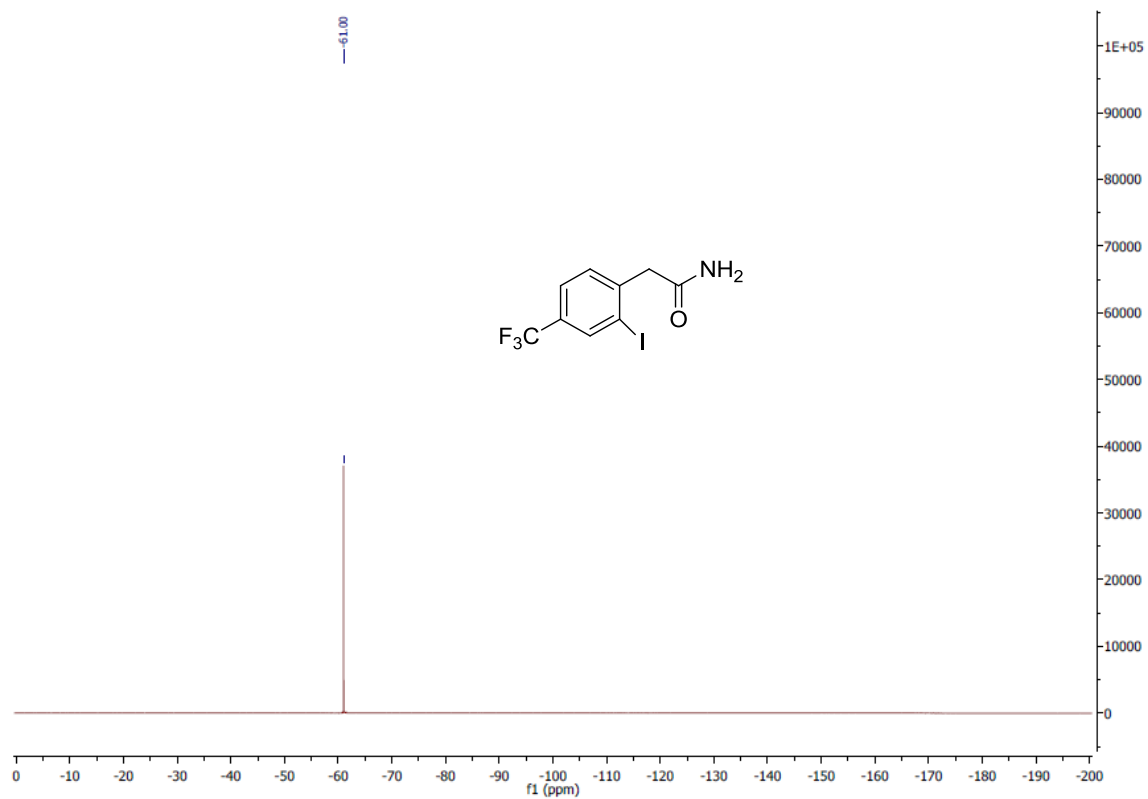

$^1\text{H}$  and  $^{13}\text{C}\{\text{H}\}$  spectra of **31**

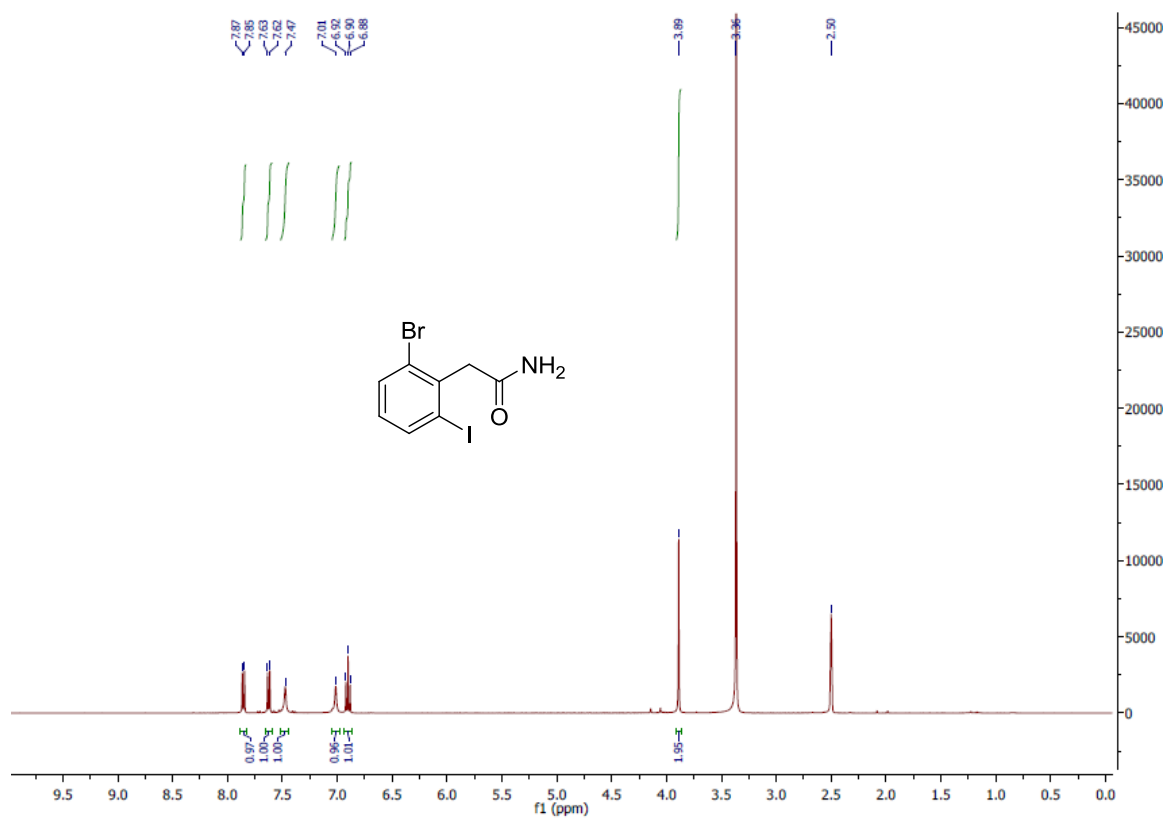

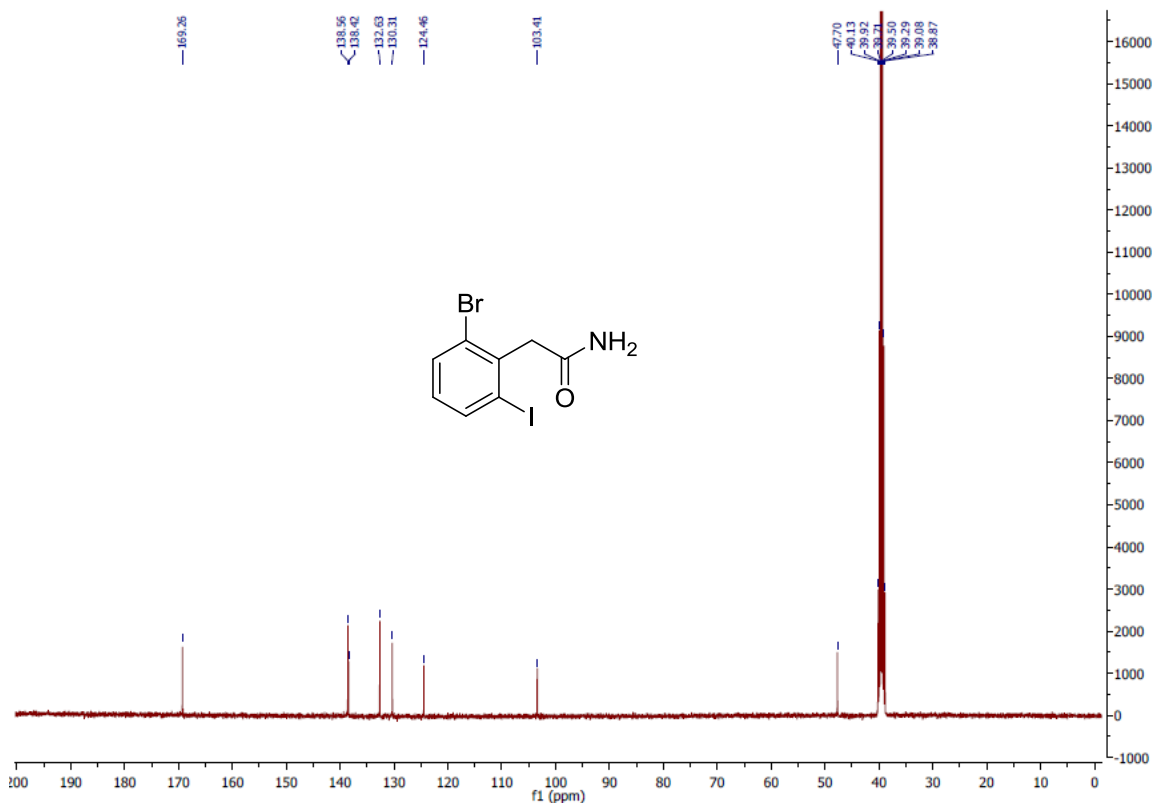

$^1\text{H}$  and  $^{13}\text{C}\{\text{H}\}$  spectra of **3m**

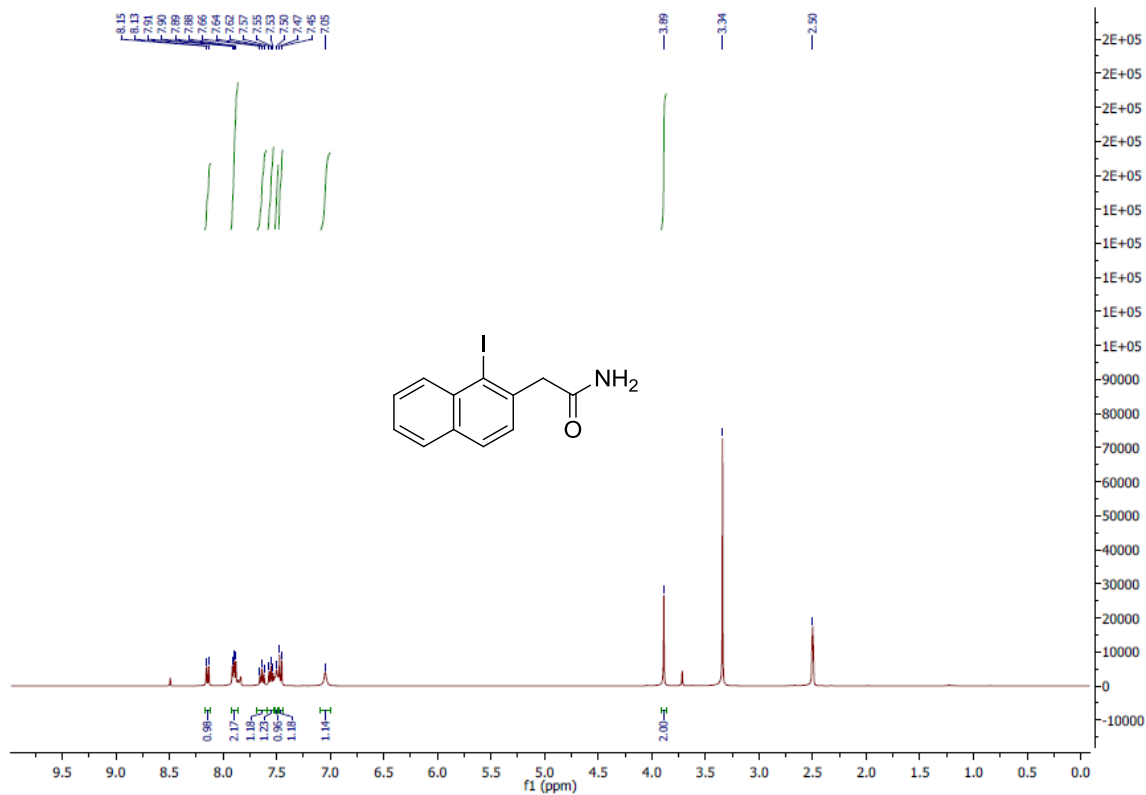



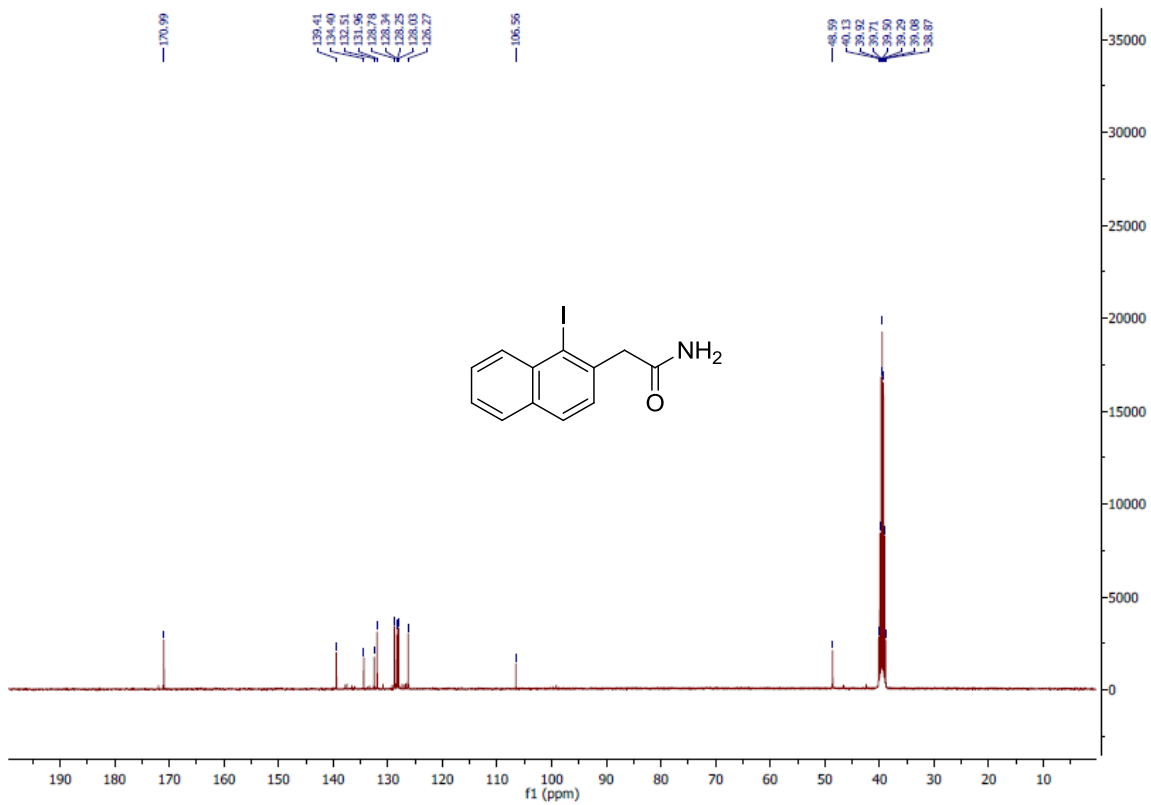

<sup>1</sup>H and <sup>13</sup>C{H} spectra of **3n**

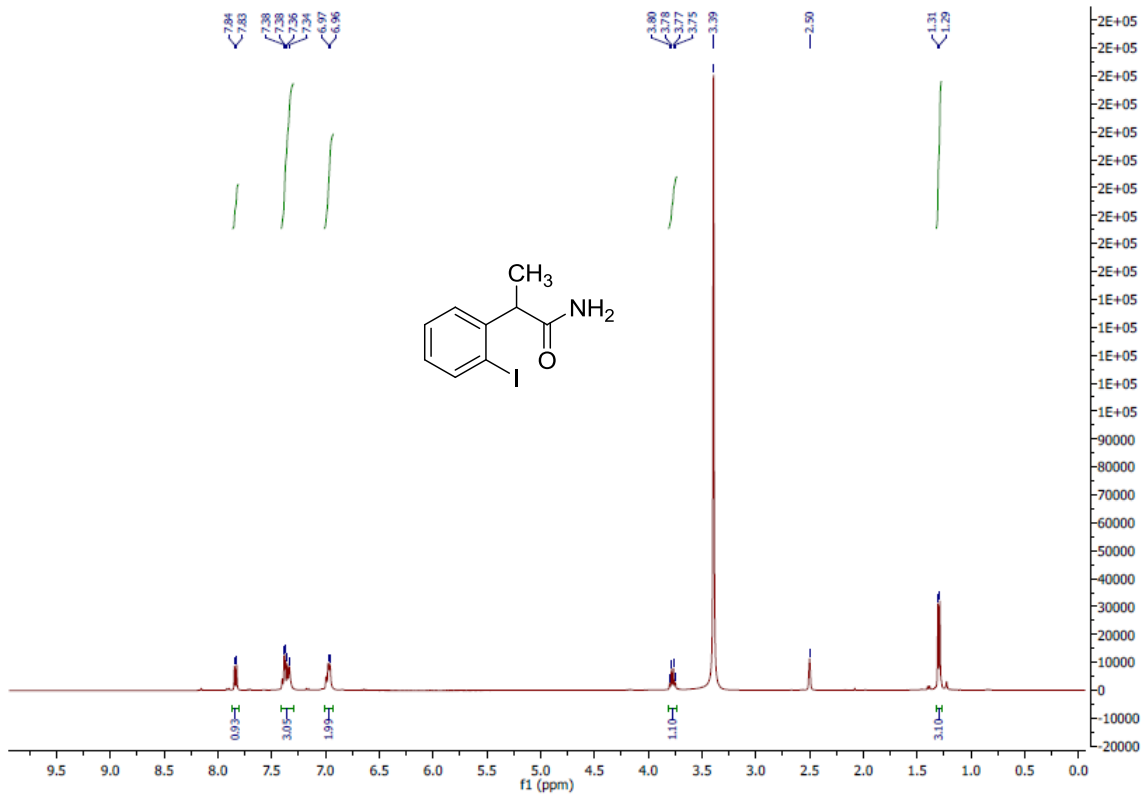



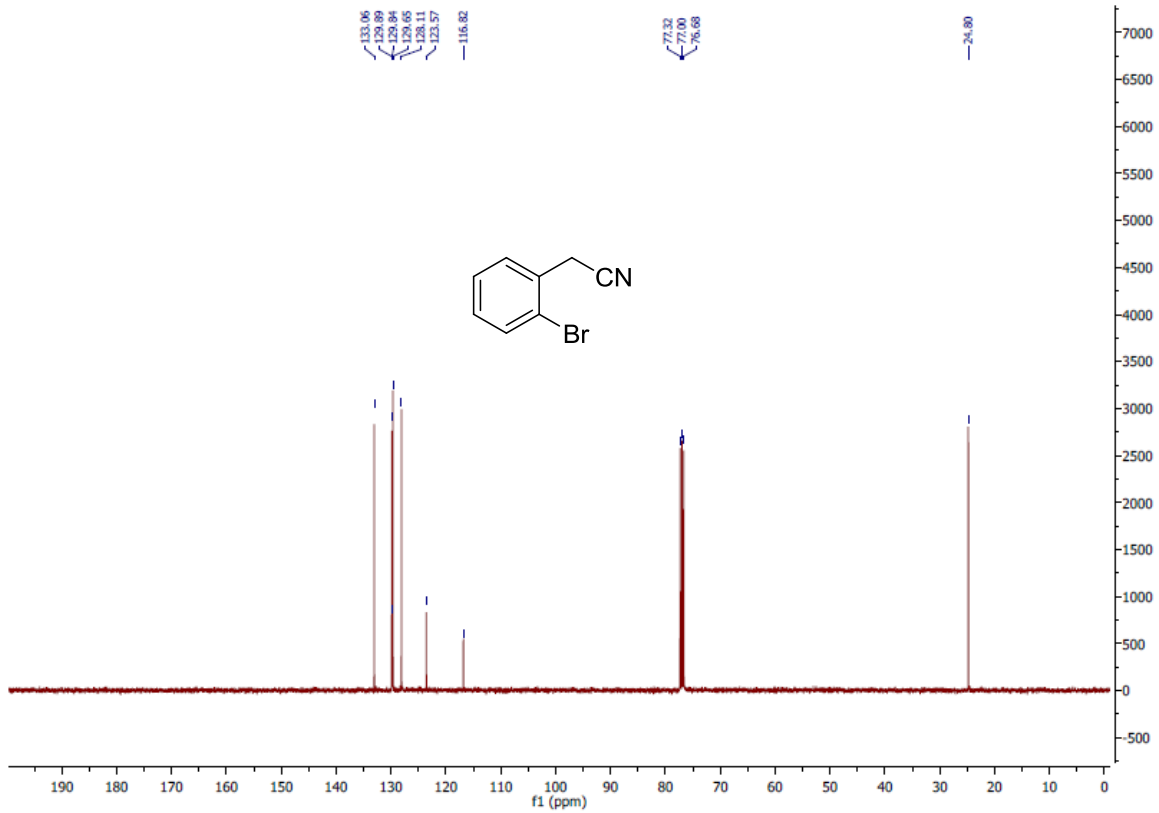

$^1\text{H}$  and  $^{13}\text{C}\{\text{H}\}$  spectra of **4b**

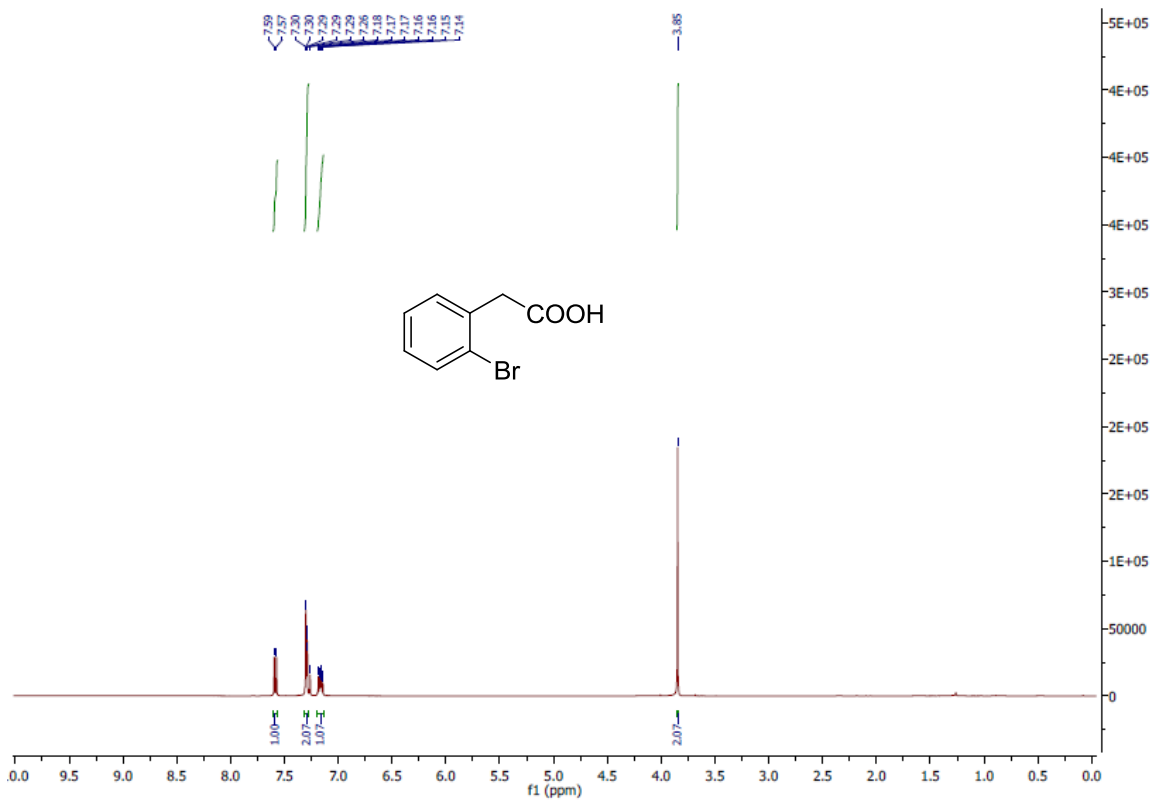

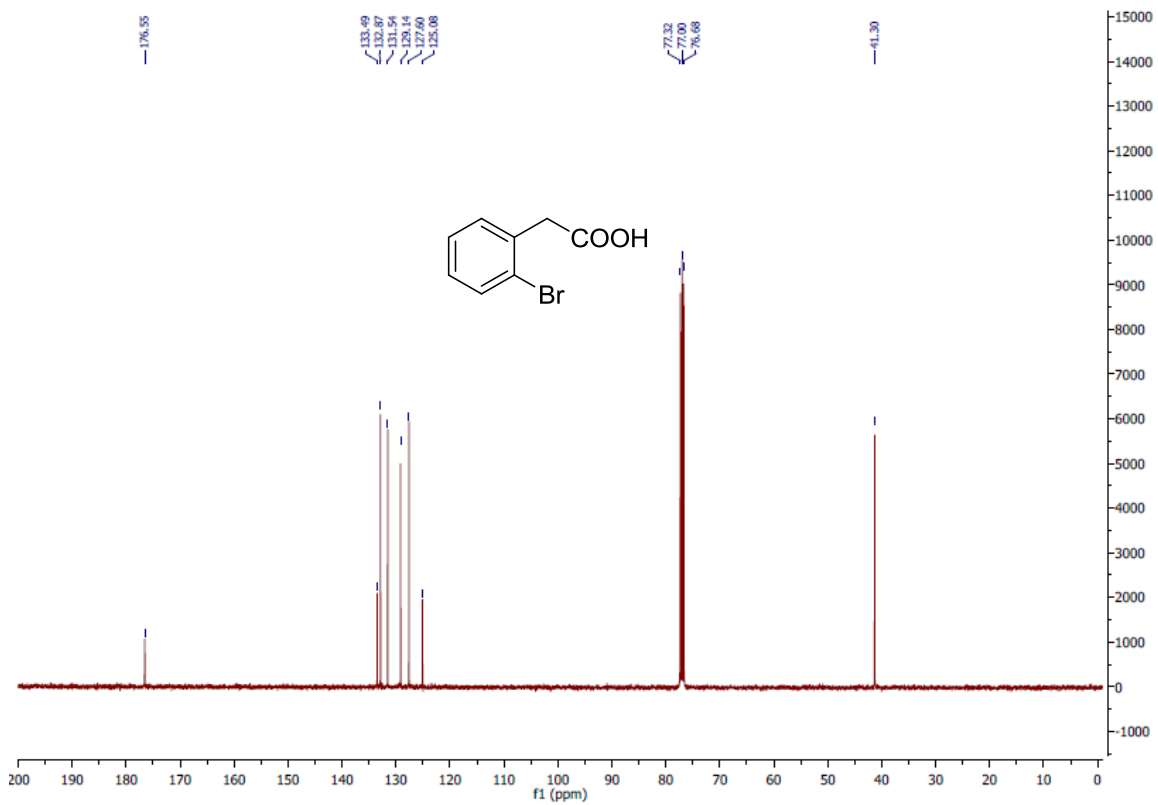

$^1\text{H}$  and  $^{13}\text{C}\{\text{H}\}$  spectra of **4c**

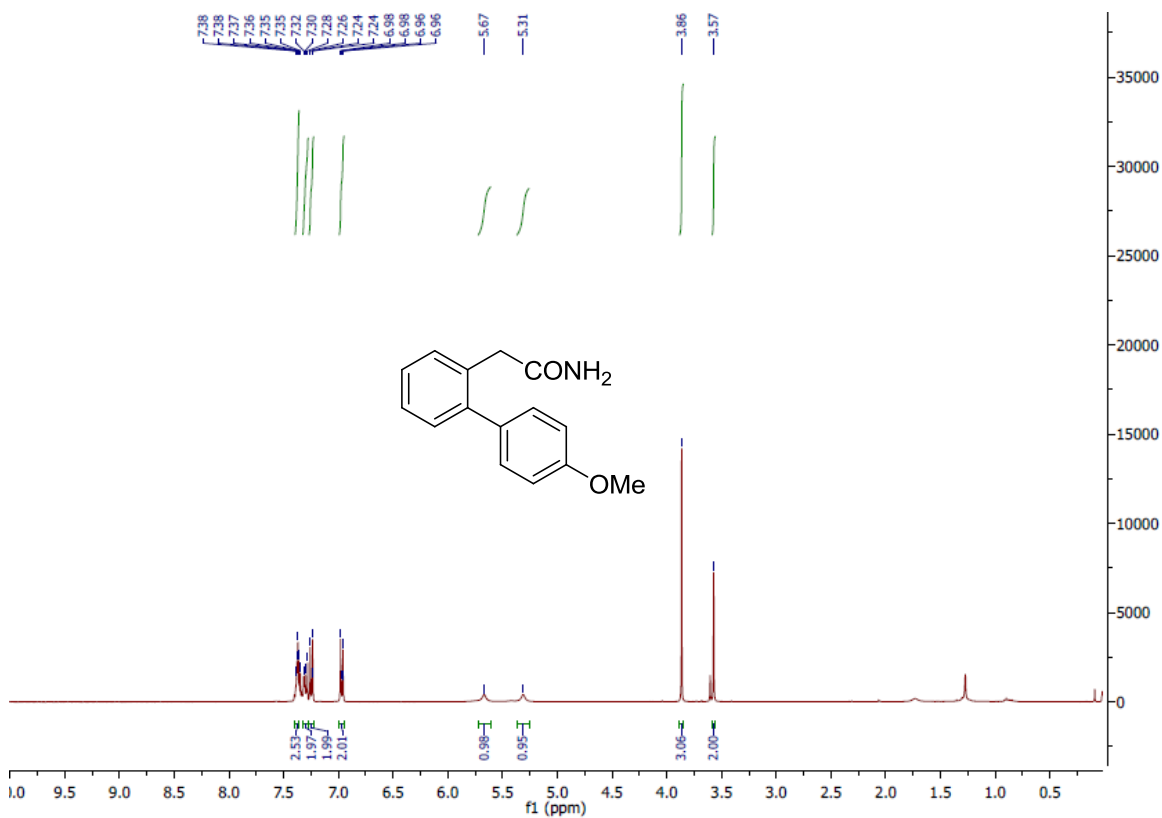

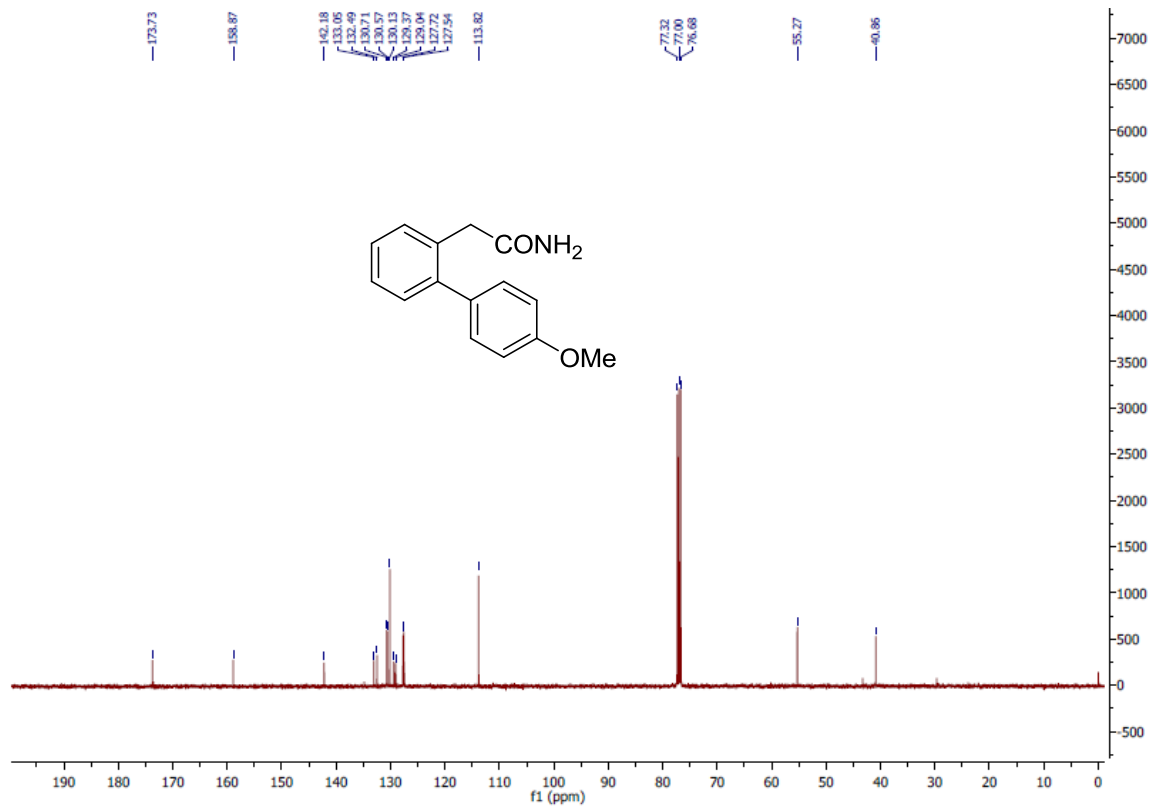

<sup>1</sup>H and <sup>13</sup>C{H} spectra of 5a

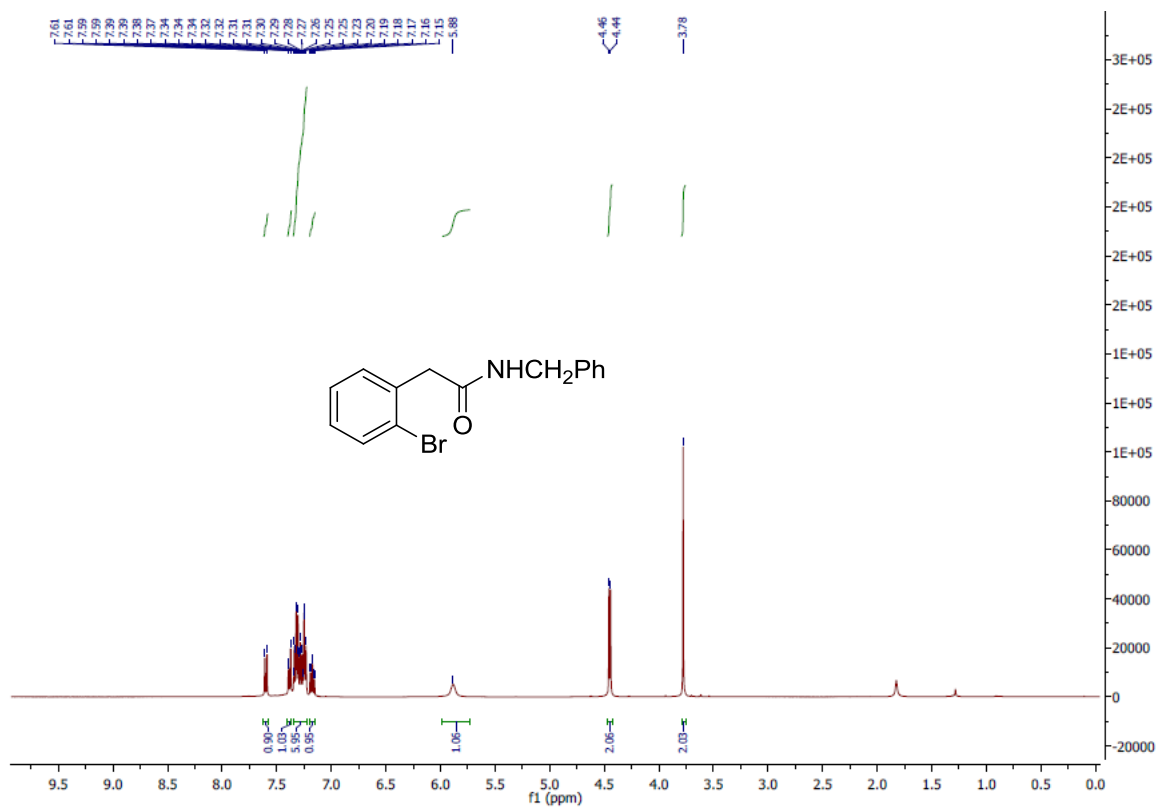

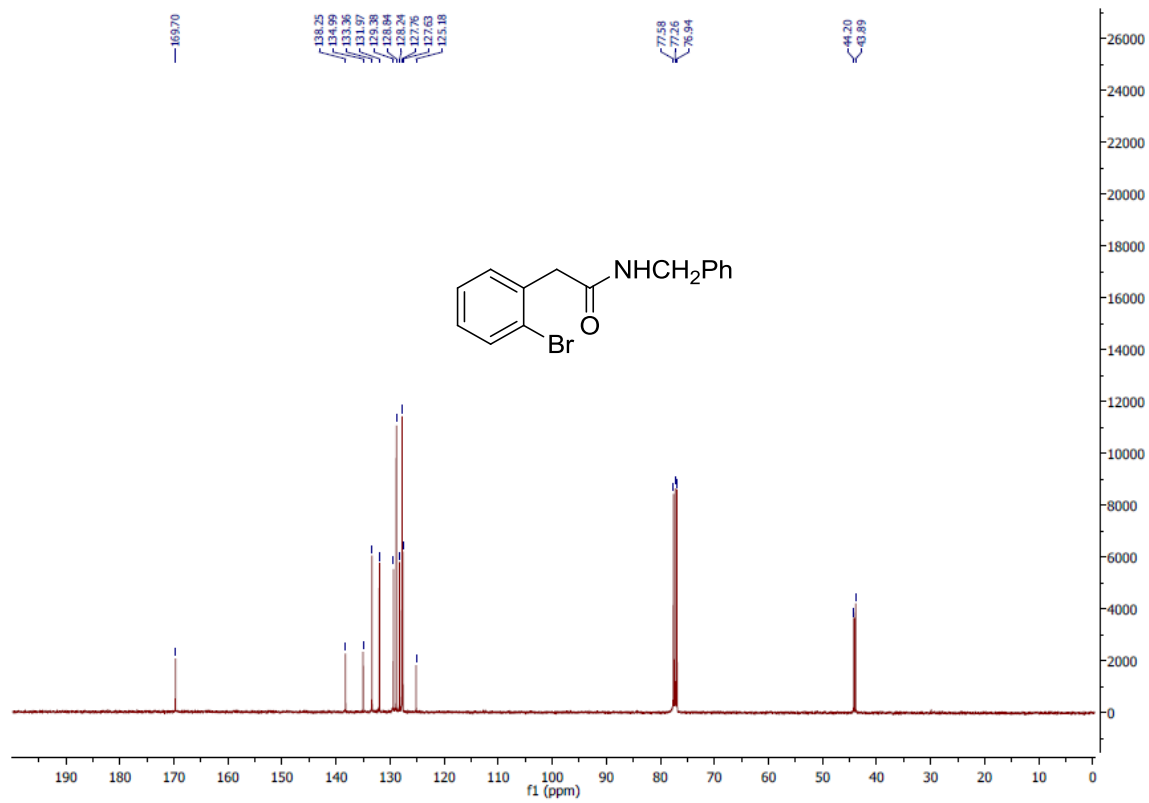

Supplement: c9ob01082c1.pdf [file c9ob01082c1.pdf]
